# Supplementary material
Source: Royal Society of Chemistry journal article supplement (doi:10.1039/d5qi01281c)

# Supporting Information

## **Spin-Crossover Tuning in Synergistic Luminescent Fe(II) Coordination Compounds via Topochemical [4+4] Photocycloaddition of an Anthracene-Based Ligand**

Matthias Schöbinger,<sup>\*,[a]</sup> Martin Huber,<sup>+[a]</sup> Sophia Mundigler,<sup>+[a]</sup> Berthold Stöger,<sup>[b]</sup> Michael Reissner<sup>[c]</sup> and Peter Weinberger<sup>\*,[a]</sup>

[a]

*Dr. M. Schöbinger, Dr. M. Huber, S. Mundigler, MSc., Prof. P. Weinberger  
Institute of Applied Synthetic Chemistry, TU Wien  
Getreidemarkt 9, 1060, Vienna (Austria)  
E-mail: matthias.schoebinger@tuwien.ac.at, peter.e163.weinberger@tuwien.ac.at*

[b]

*Dr. B. Stöger  
X-ray Center, TU Wien  
Getreidemarkt 9/164, 1060, Vienna (Austria)*

[c]

*Prof. M. Reissner  
Institute of Solid State Physics  
Wiedner Hauptstraße 8, 1040, Vienna (Austria)*

[\*]

*These authors contributed equally to this manuscript.*

# Table of Contents

|                                                                 |    |
|-----------------------------------------------------------------|----|
| Experimental Protocols .....                                    | 3  |
| Spectroscopic Measurements .....                                | 4  |
| Room Temperature Diffuse Reflectance and Emission Spectra ..... | 5  |
| Variable-Temperature Emission Spectra .....                     | 7  |
| L1 .....                                                        | 7  |
| L2 .....                                                        | 9  |
| Coordination Compound 1 .....                                   | 11 |
| Coordination Compound 2 .....                                   | 13 |
| Coordination Compound 3 .....                                   | 15 |
| Spectral Overlap of Absorption and Emission Spectra .....       | 17 |
| Magnetic Measurements .....                                     | 18 |
| Thermal Analysis .....                                          | 19 |
| XRPD Measurements .....                                         | 21 |
| X-Ray Structure Determination .....                             | 24 |
| References .....                                                | 58 |
| NMR Spectra .....                                               | 58 |
| Photocycloreversion experiments in solid-state .....            | 60 |
| IR Spectra .....                                                | 64 |

## Experimental Protocols

All syntheses were performed with dried glassware, anhydrous and degassed solvents, and under an atmosphere of argon. Reaction monitoring was performed by TLC, if not otherwise noted. Anthracen-9-ylmethanamine was synthesized according to a literature protocol<sup>1</sup>, all other starting materials were commercially purchased and used without further purifications if not stated otherwise. Irradiation experiments were conducted with an LX500 controller (OmniCure® spot curing system) and a 365 nm LED through quartz glass resulting in a light intensity of approx.  $7 \cdot 10^5 \mu\text{W}/\text{cm}^2$ . The light intensity was measured with an Ocean Optics 200+ device and the SpectraSuit.

### NMR Measurements

NMR measurements were performed in dry, deuterated solvents on a Bruker Avance UltraShield 400 MHz or a 600 MHz spectrometer. The recorded <sup>1</sup>H and <sup>13</sup>C spectra were referenced internally to residual proton signals, respectively, to the solvent resonances and reported relative to TMS.

### HR-MS Measurements

HR-MS measurements were performed in 10 μM solutions of CH<sub>3</sub>CN/H<sub>2</sub>O mixtures. The experimental setup consists of an Agilent G7167B multi sampler, an Agilent G7120A binary pump with a degasser, an Agilent G7116B oven, and an Agilent 6545 Q-TOF mass spectrometer equipped with a dual AJS and Multimode ion source (Agilent Technologies, Palo Alto, United States).

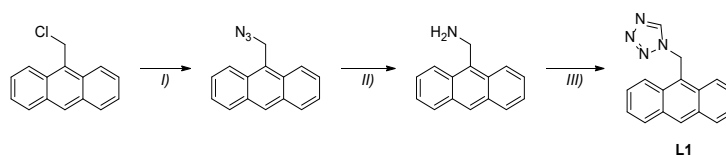

**Scheme 1.** Synthesis of **L1**, reagents and conditions: *i*) NaN<sub>3</sub>, DMF, 50 °C, 2 h, quant.; *ii*) Ph<sub>3</sub>P, H<sub>2</sub>O, THF, 0 °C to rt, o.n., 94.9 %; *iii*) NaN<sub>3</sub>, triethyl orthoformate, acetic acid, 65 °C, o.n., 25.7 %.

### Synthesis of 1-(anthracen-9-ylmethyl)-1H-tetrazole (**L1**)

For the following synthesis a modified literature protocol was used.<sup>2</sup>

Anthracen-9-ylmethanamine (1.77 g, 8.54 mmol, 1.00 equiv.) and NaN<sub>3</sub> (0.837 g, 12.8 mmol, 1.50 equiv.) were added to a mixture of triethyl orthoformate (2.00 g, 13.2 mmol, 1.55 equiv.) and glacial acetic acid (70.8 mL). After the reaction mixture was stirred at 65 °C over night, it was cooled to room temperature, diluted with CH<sub>2</sub>Cl<sub>2</sub> (150 mL) and poured into water (150 mL). The aqueous phase was extracted with CH<sub>2</sub>Cl<sub>2</sub> (3 x 100 mL) and the combined organic phases were washed with water (1 x 100 mL). Then the organic phases were dried over MgSO<sub>4</sub> and concentrated in *vacuo* to yield an orange-yellow solid. The crude product was purified by column chromatography (approx. 400 g silica gel; mobile phase: CH<sub>2</sub>Cl<sub>2</sub>:CH<sub>3</sub>CN = 40:1; R<sub>F</sub> = 0.33) to yield 0.576 g (25.7 %) of **L1** as off-white solid. <sup>1</sup>H-NMR (400 MHz, DMSO-*d*<sub>6</sub>): δ = 9.56 (s, 1H), 8.73 (s, 1H), 8.57 (d, J = 8.9 Hz, 2H), 8.15 (d, J = 8.5 Hz, 2H), 7.70 – 7.62 (m, 2H), 7.61 – 7.52 (m, 2H), 6.75 ppm (s, 2H). <sup>13</sup>C{<sup>1</sup>H}-NMR (151 MHz, DMSO-*d*<sub>6</sub>): δ = 143.8, 16, 131.0, 130.4, 129.5, 129.2, 127.3, 125.5, 124.5, 123.8, 43.8 ppm. HR-MS ESI (+) *m/z* calc. for C<sub>16</sub>H<sub>12</sub>N<sub>4</sub> [M+H]<sup>+</sup>: 261.1134, not detected. Observed fragment: C<sub>15</sub>H<sub>11</sub> [M-tetrazole]<sup>+</sup>, *m/z* calc. 191.0861, found: 191.085

### [4+4] Photocycloaddition of **L1** in Solution (Synthesis of **L2**)

A solution of **L1** (200 mg, 0.762 mmol) in CH<sub>2</sub>Cl<sub>2</sub> (30 mL) was irradiated with 365 nm LED light at room temperature for 6 h. A precipitation formed which was separated from the solution and the crude product was washed with diethyl ether (4 x 12 mL) to yield 188 mg (94.7 %) of **L2** as white solid. <sup>1</sup>H-NMR (400 MHz, DMSO-*d*<sub>6</sub>): δ = 8.37 (s, 2H), 7.15 (d, J = 7.4 Hz, 4H), 6.90 – 6.70 (m, 12H), 6.00 (s, 4H), 4.31 ppm (s, 2H). <sup>13</sup>C{<sup>1</sup>H}-NMR (151 MHz, DMSO-*d*<sub>6</sub>): δ = 143.9, 141.8, 140.9, 128.1, 126.0, 125.7, 125.3, 59.1, 55.4, 50.3 ppm. HR-MS ESI (+) *m/z* calc. for C<sub>32</sub>H<sub>24</sub>N<sub>8</sub> [M+H]<sup>+</sup>: 521.2202, found: 521.2210.

#### [4+4] Photocycloaddition of L1 in Solid State (Synthesis of L2)

A solid-state powder sample of L1 (20.0 mg, 0.0762 mmol) was irradiated with 365 nm LED light at room temperature for 8 h. Every 30 min the powder was homogenized. The conversion rate (<sup>1</sup>H-NMR) reached a plateau after 3 h at 50 %. Due to the successful synthesis of L2 in solution, the product was not isolated.

The [4+4] photocycloaddition is quantitatively reversible by heating L2 in DMSO to 150 °C for 10 min. The solid powder of L2 is thermally stable until 175 °C.

#### Synthesis of Coordination Compound 1

Fe(ClO<sub>4</sub>)<sub>2</sub>•6H<sub>2</sub>O (17.3 mg, 0.0477 mmol, 1.00 equiv.) and a spatula tip of ascorbic acid were mixed in in CH<sub>3</sub>CN (1 mL), filtrated and added to a mixture of L1 (49.7 mg, 0.191 mmol, 4.00 equiv.) and CH<sub>3</sub>CN (2 mL). After the reaction mixture was stirred at 40 °C over night, it was cooled to room temperature, two thirds of the solvent were evaporated and diethyl ether (12 mL) was added to precipitate the yellowish crude product. The precipitation was separated from the yellow supernatant, washed with diethyl ether (3 x 6 mL) and dried in high vacuum to yield 39.0 mg (59.3 %) of 1 as off-white solid.

#### Synthesis of Coordination Compound 2 via Complexation of L1 and L2

Fe(ClO<sub>4</sub>)<sub>2</sub>•6H<sub>2</sub>O (17.3 mg, 0.0477 mmol, 1.00 equiv.) and a spatula tip of ascorbic acid were mixed in in CH<sub>3</sub>CN (1 mL), filtrated and added to a mixture of L1 (24.8 mg, 0.0953 mmol, 2.00 equiv.), L2 (24.8 mg, 0.0477 mmol, 1.00 equiv.) and CH<sub>3</sub>CN (2 mL). After the reaction mixture was stirred at 40 °C over night, it was cooled to room temperature, two thirds of the solvent were evaporated and diethyl ether (12 mL) was added to precipitate the yellowish crude product. The precipitation was separated from the yellow supernatant, washed with diethyl ether (3 x 6 mL) and dried in high vacuum to yield 40.0 mg (60.9 %) of 2 as off-white solid.

#### Synthesis of Coordination Compound 2 via Solid-State Photopolymerization

A solid-state powder sample of 1 (20.0 mg, 0.0170 mmol) was irradiated with 365 nm LED light at room temperature for 3 h. Every 30 min the powder was homogenized. According to XRPD and IR-spectroscopy the reaction was quantitative, no color change was observed.

#### Synthesis of Coordination Compound 3

Fe(ClO<sub>4</sub>)<sub>2</sub>•6H<sub>2</sub>O (17.3 mg, 0.0477 mmol, 1.00 equiv.) and a spatula tip of ascorbic acid were mixed in in CH<sub>3</sub>CN (1 mL), filtrated and added to a mixture of L2 (49.7 mg, 0.0953 mmol, 2.00 equiv.) and CH<sub>3</sub>CN (2 mL). After the reaction mixture was stirred at 40 °C over night, it was cooled to room temperature, two thirds of the solvent were evaporated and diethyl ether (12 mL) was added to precipitate the off-white crude product. The precipitation was separated from the supernatant, washed with diethyl ether (3 x 6 mL) and dried in high vacuum to yield 46.0 mg (70.0 %) of 3 as white solid.

## Spectroscopic Measurements

UV-Vis-NIR measurements were performed on a Lambda 900 spectrophotometer (PerkinElmer). Solid samples were measured in diffuse reflectance with a Harrick powder sample holder in "Praying Mantis" configuration against BaSO<sub>4</sub>. Diffuse reflectance data (R) were converted using the Kubelka-Munk function, defined as  $F(R) = \frac{(1-R)}{2R}$ .

IR spectra were recorded with a SpectrumTwo ATR-FT-IR-spectrometer (Perkin Elmer) using a diamond ATR-unit.

All PL spectra were recorded with a FluoTime 300 fluorescence lifetime spectrometer (PicoQuant) equipped with a coaxial UV-Xenon arc lamp, a high-resolution excitation and emission double monochromator, and a PMA hybrid 07 detector. Variable temperature experiments were performed using a liquid-nitrogen-filled cryostat Optistat DN connected to a Mercury ITC temperature controller (Oxford Instruments).

## Room Temperature Diffuse Reflectance and Emission Spectra

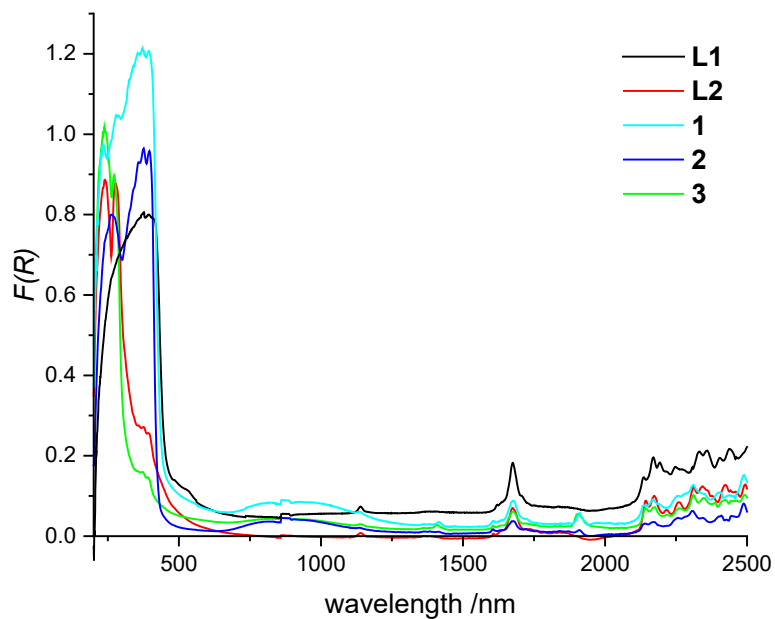

Figure S 1. UV-Vis-NIR spectra of L1, L2 and 1-3.

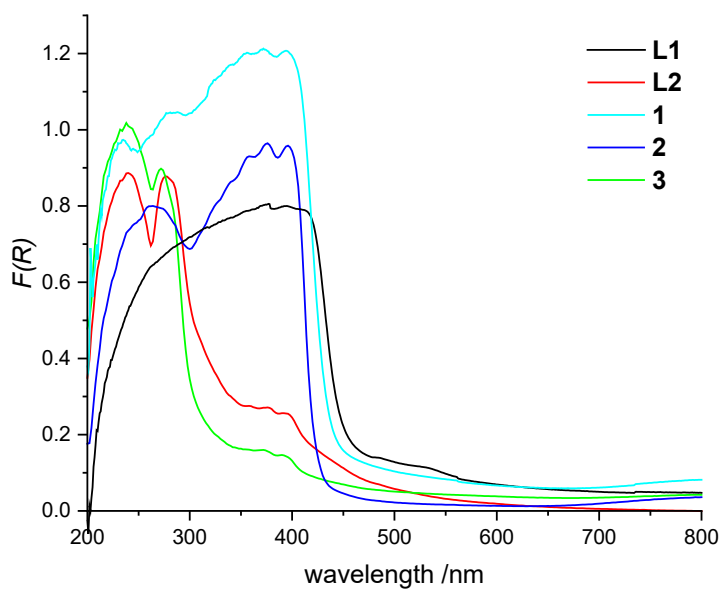

Figure S 2. UV-Vis range of L1, L2 and 1-3.

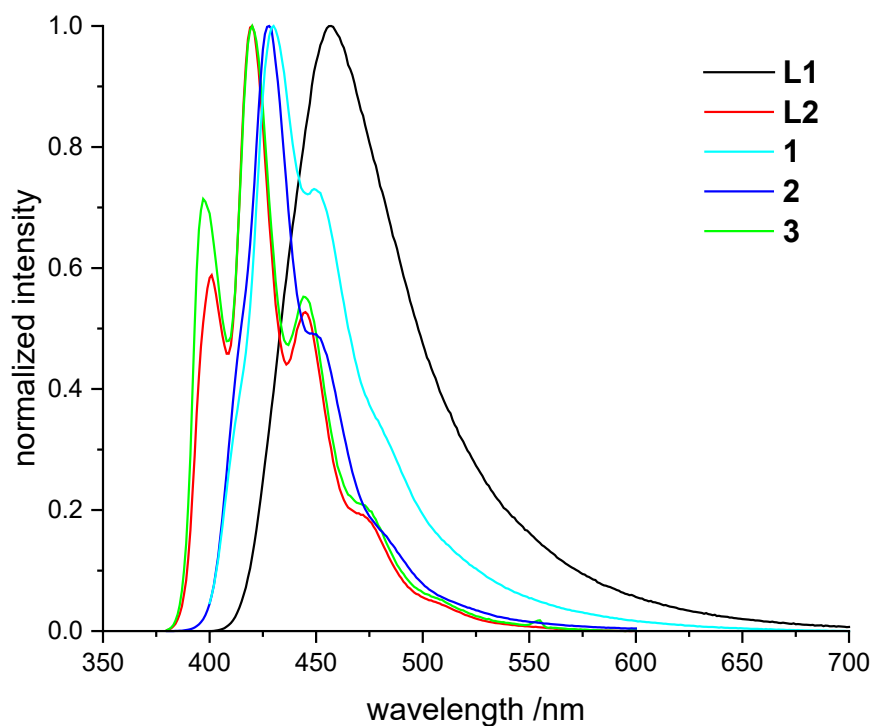

**Figure S 3.** Normalized solid state emission spectra of **L1, 1** ( $\lambda_{\text{exc.}} = 390 \text{ nm}$ ) and **L2, 2, 3** ( $\lambda_{\text{exc.}} = 370 \text{ nm}$ ).

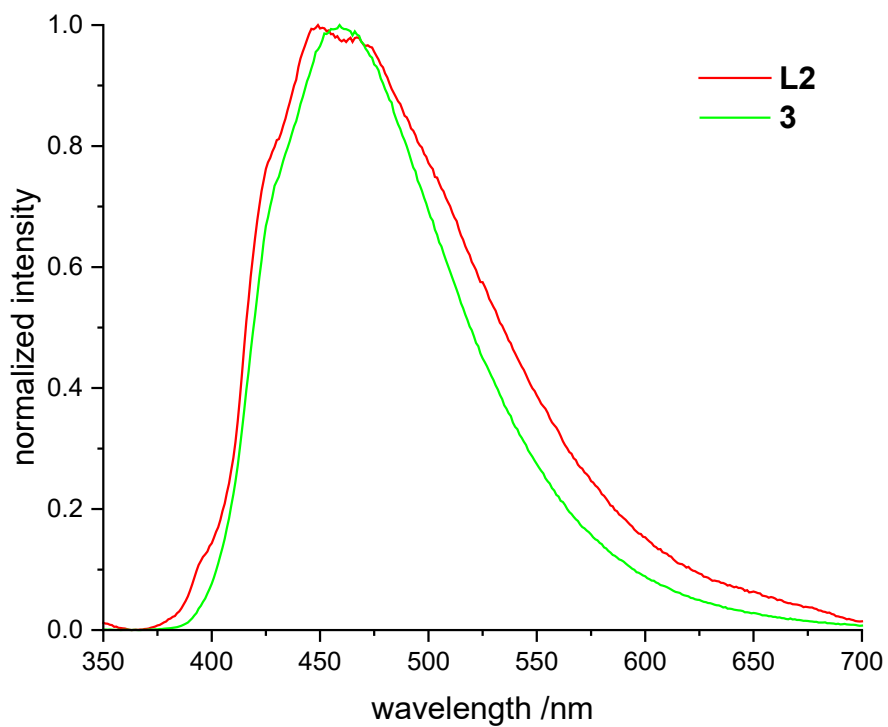

**Figure S 4.** Normalized solid state emission spectra of **L2** and **3** ( $\lambda_{\text{exc.}} = 276 \text{ nm}$ ).

# Variable-Temperature Emission Spectra

L1

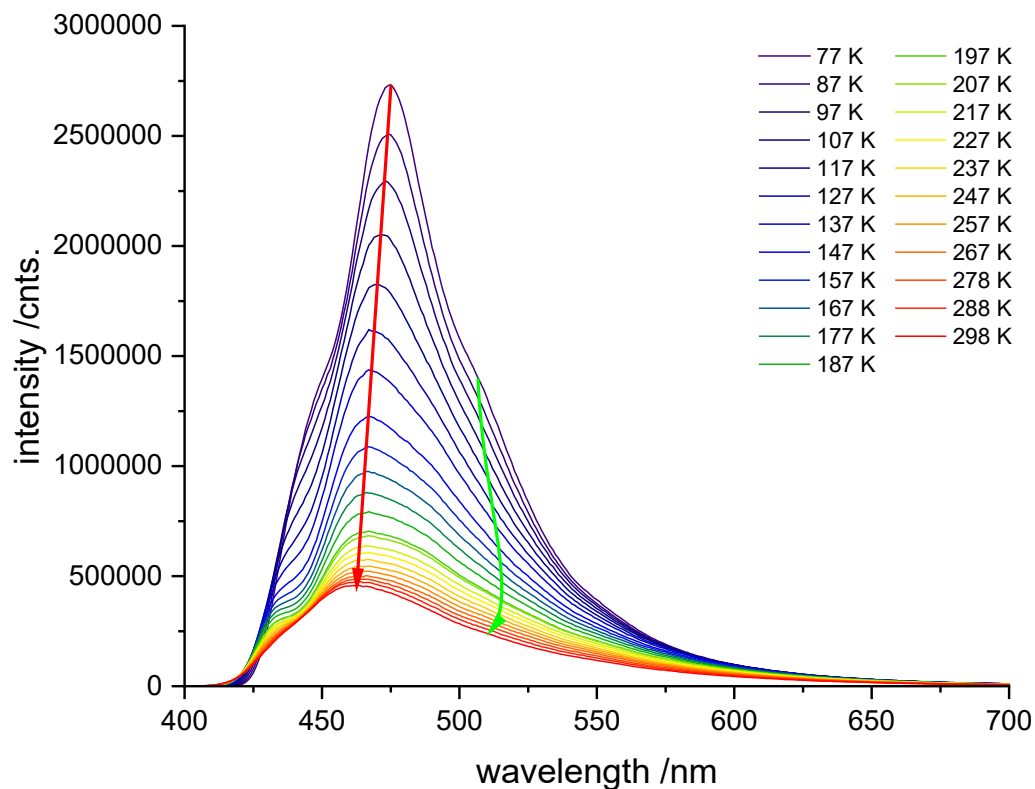

**Figure S 5.** Temperature-dependent fluorescence emission spectra of L1.  $\lambda_{\text{exc.}} = 390$  nm. The colored arrows indicate the evolution of the respective fitted peaks with increasing temperature (red: Peak 1; green: Peak 2).

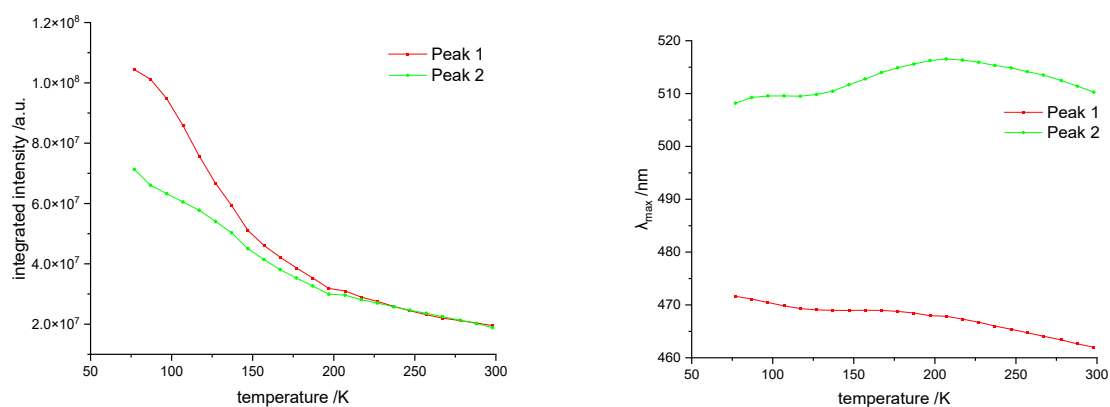

**Figure S 6.** Temperature dependence of the integrated intensity (left) and  $\lambda_{\text{max}}$  (right) of the fitted Peaks 1 and 2 for L1.

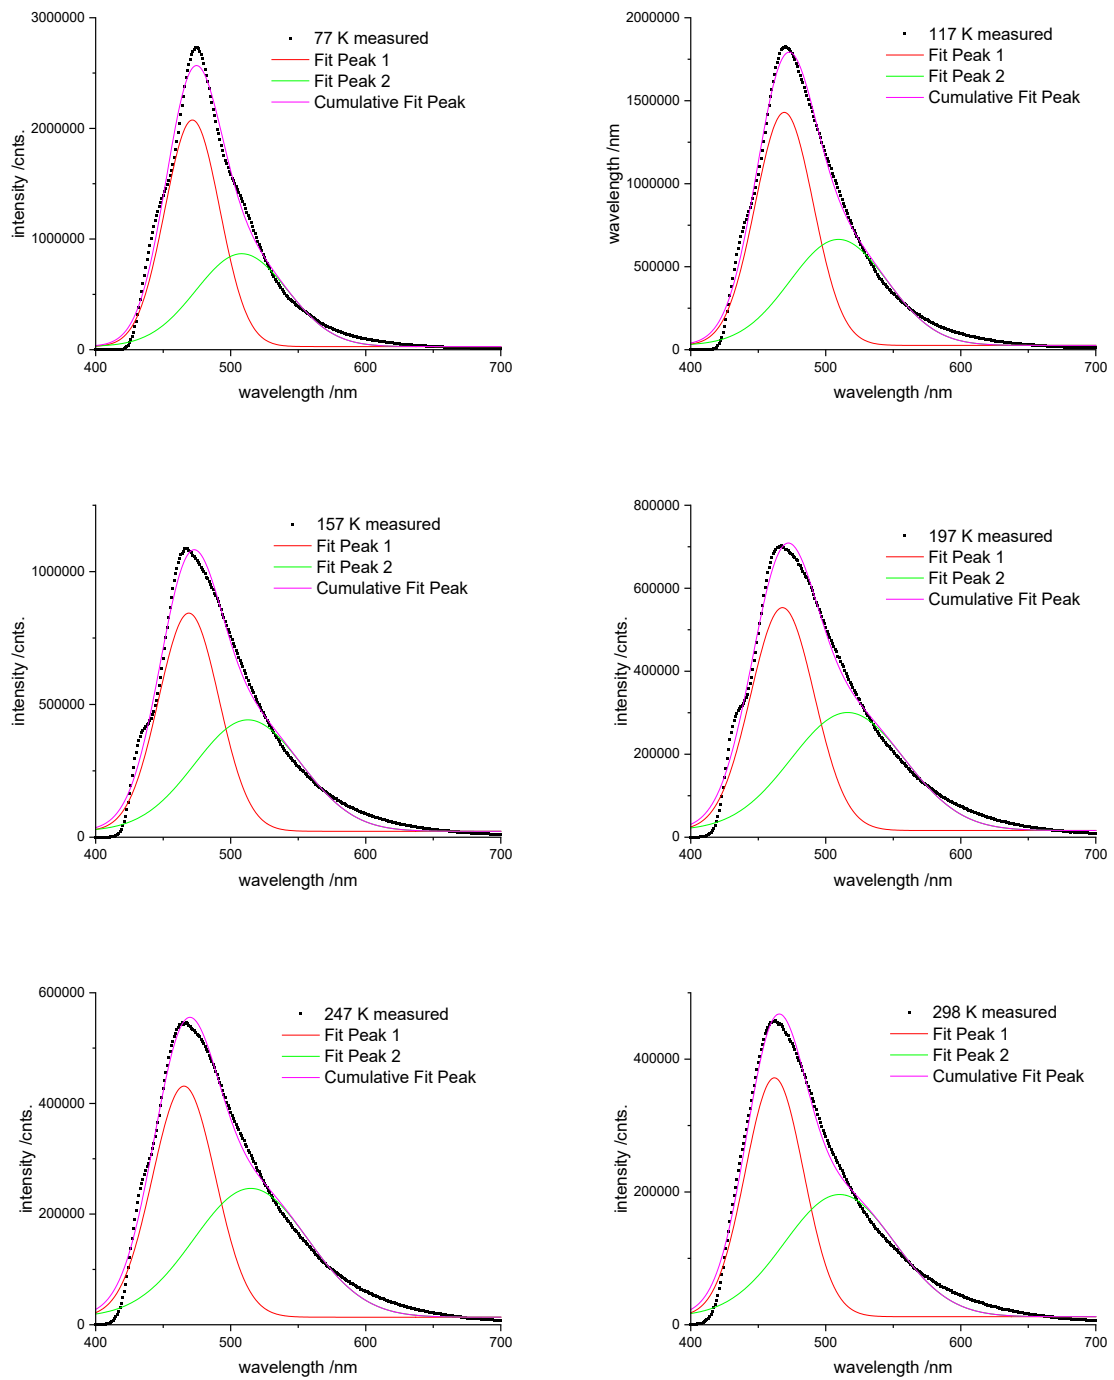

**Figure S 7.** Selected emission spectra at different temperatures of L1 fitted with two Gaussian functions.

L2

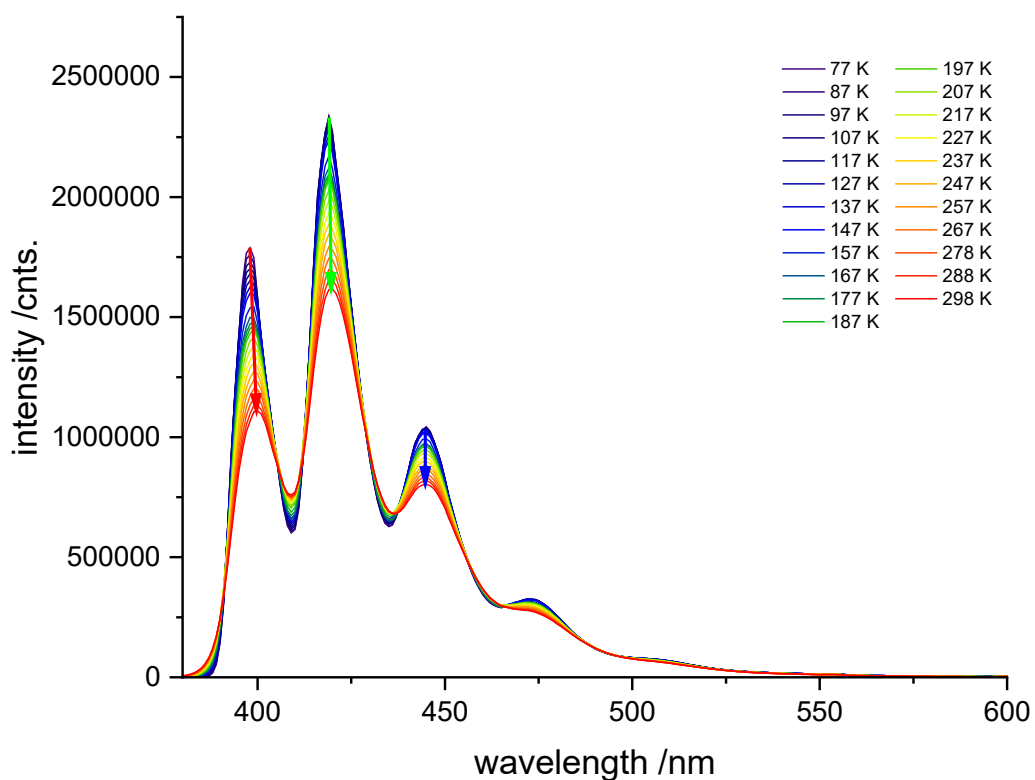

**Figure S 8.** Temperature-dependent fluorescence emission spectra of **L2**.  $\lambda_{exc.} = 370$  nm. The colored arrows indicate the evolution of the respective fitted peaks with increasing temperature (red: Peak 1; green: Peak 2; blue: Peak 3).

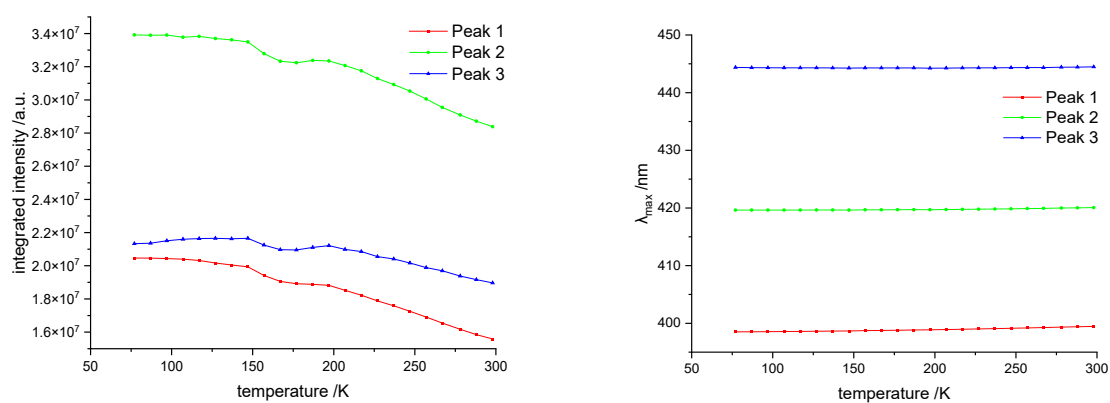

**Figure S 9.** Temperature dependence of the integrated intensity (left) and  $\lambda_{max}$  (right) of the fitted Peaks 1, 2 and 3 for **L2**.

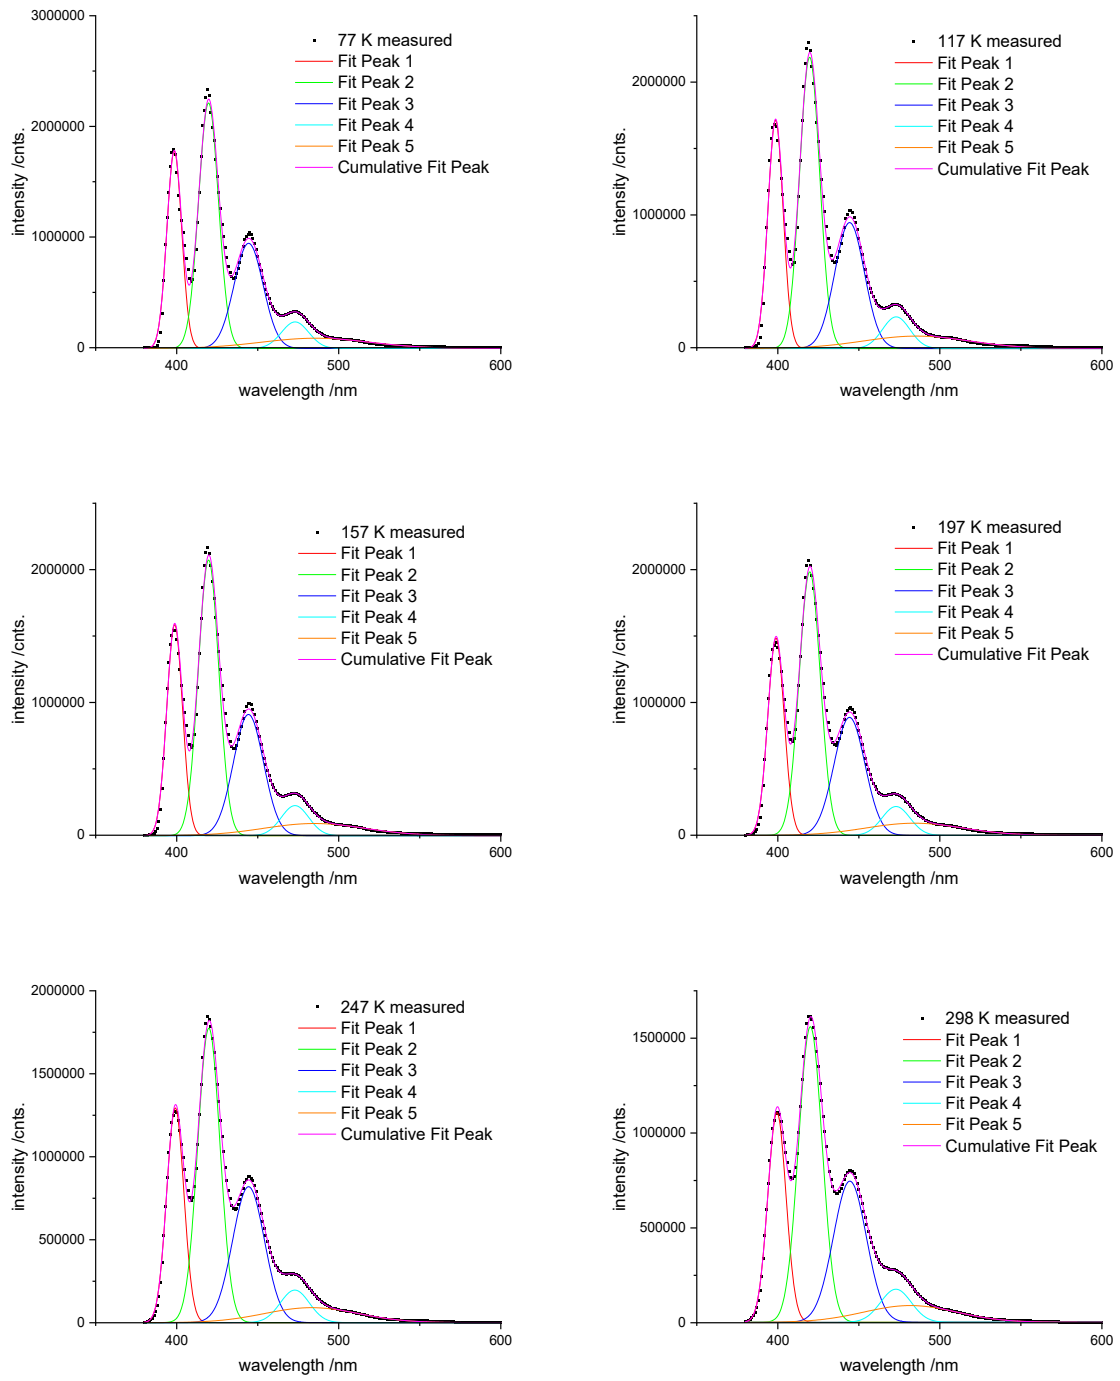

**Figure S 10.** Selected emission spectra at different temperatures of L2 fitted with five Gaussian functions.

## Coordination Compound 1

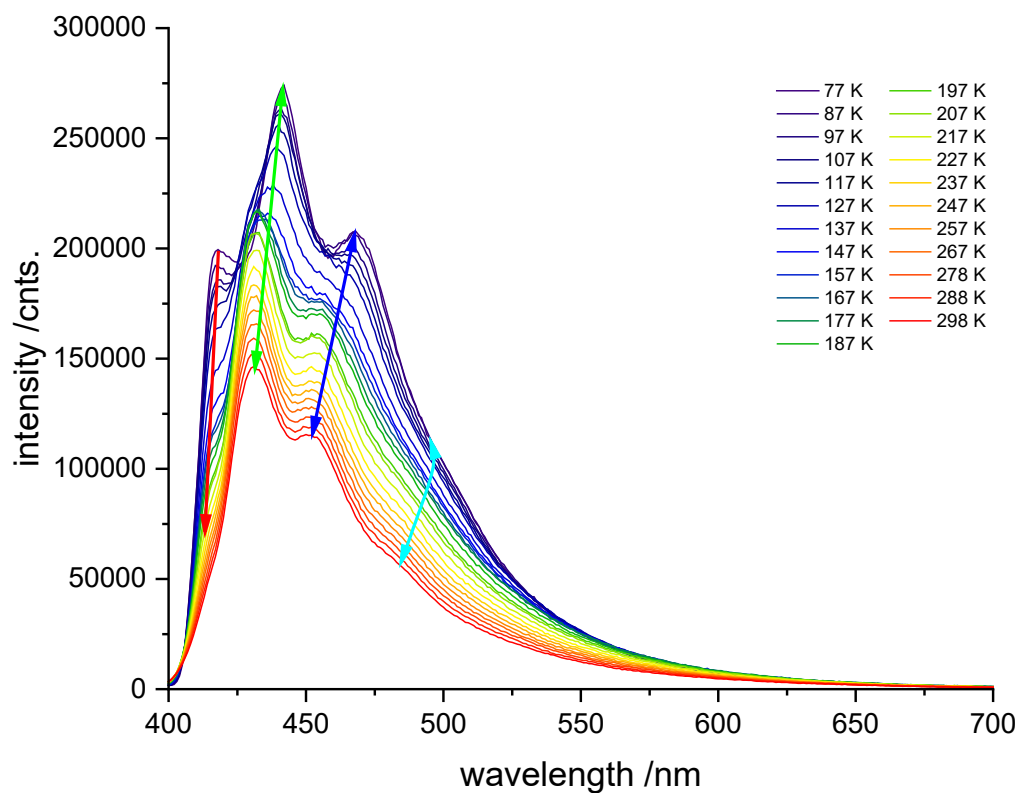

**Figure S 11.** Temperature-dependent fluorescence emission spectra of 1.  $\lambda_{exc.} = 390$  nm. The colored arrows indicate the evolution of the respective fitted peaks with increasing temperature (red: Peak 1; green: Peak 2; blue: Peak 3; cyan: Peak 4).

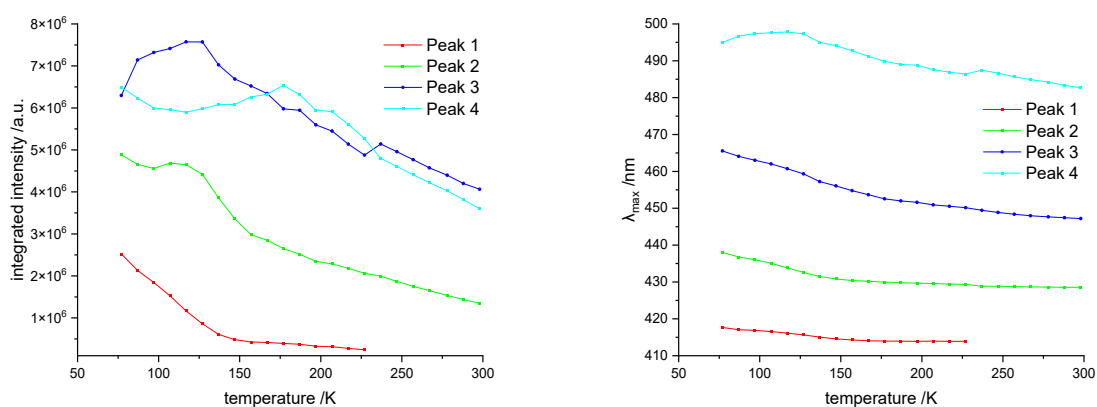

**Figure S 12.** Temperature dependence of the integrated intensity (left) and  $\lambda_{max}$  (right) of the fitted Peaks 1, 2, 3 and 4 for 1.

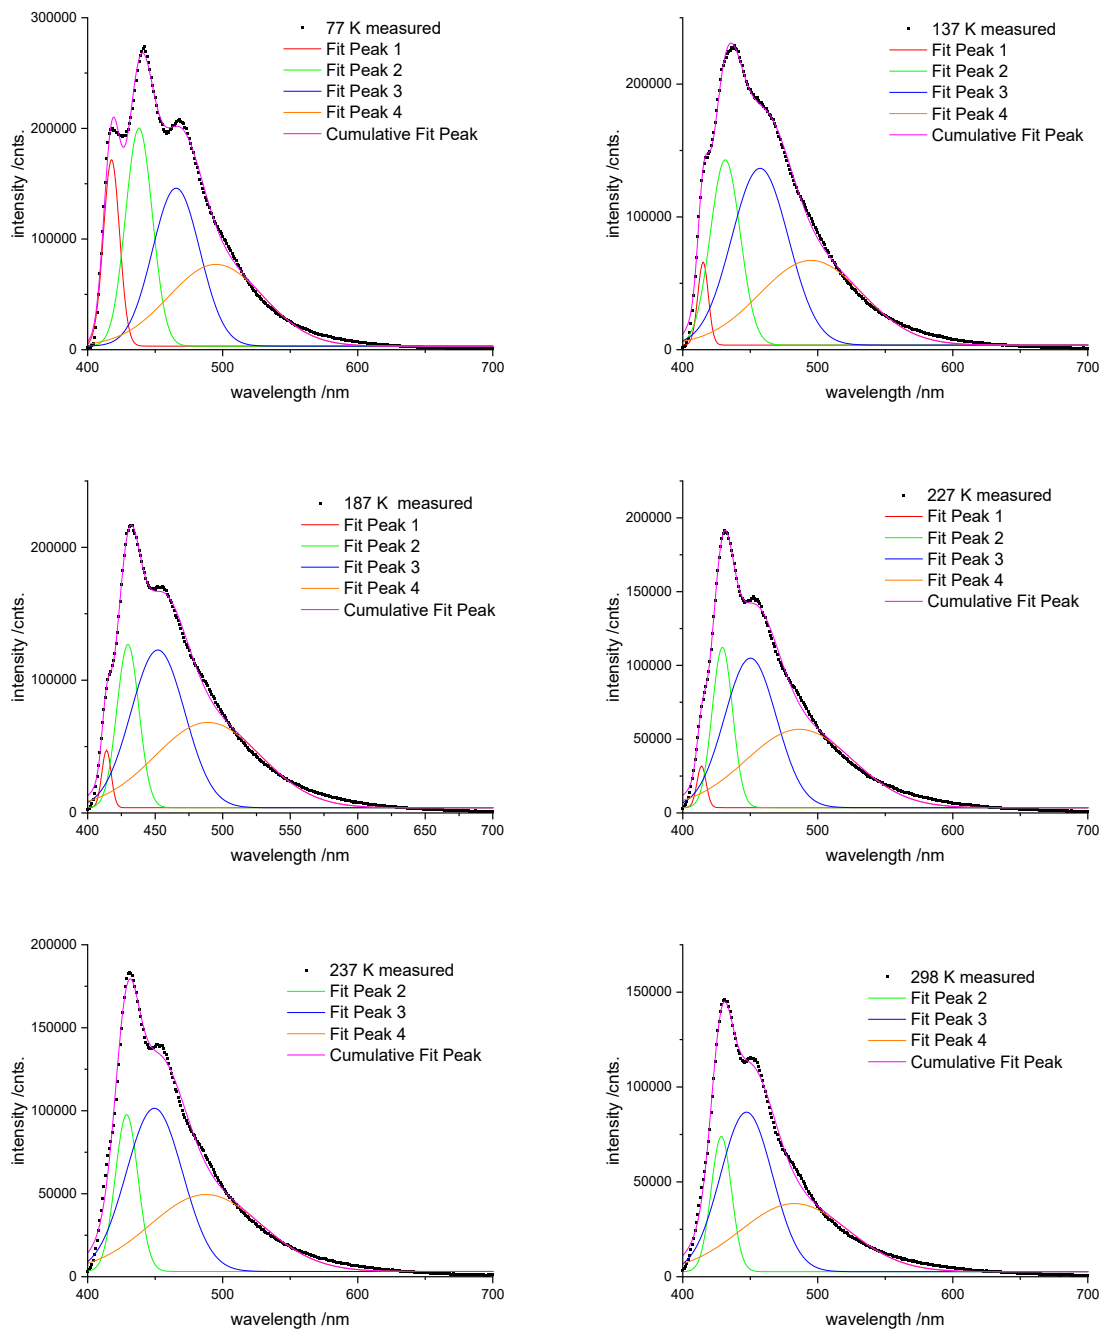

**Figure S 13.** Selected emission spectra at different temperatures of **1** fitted with multiple Gaussian functions.

## Coordination Compound 2

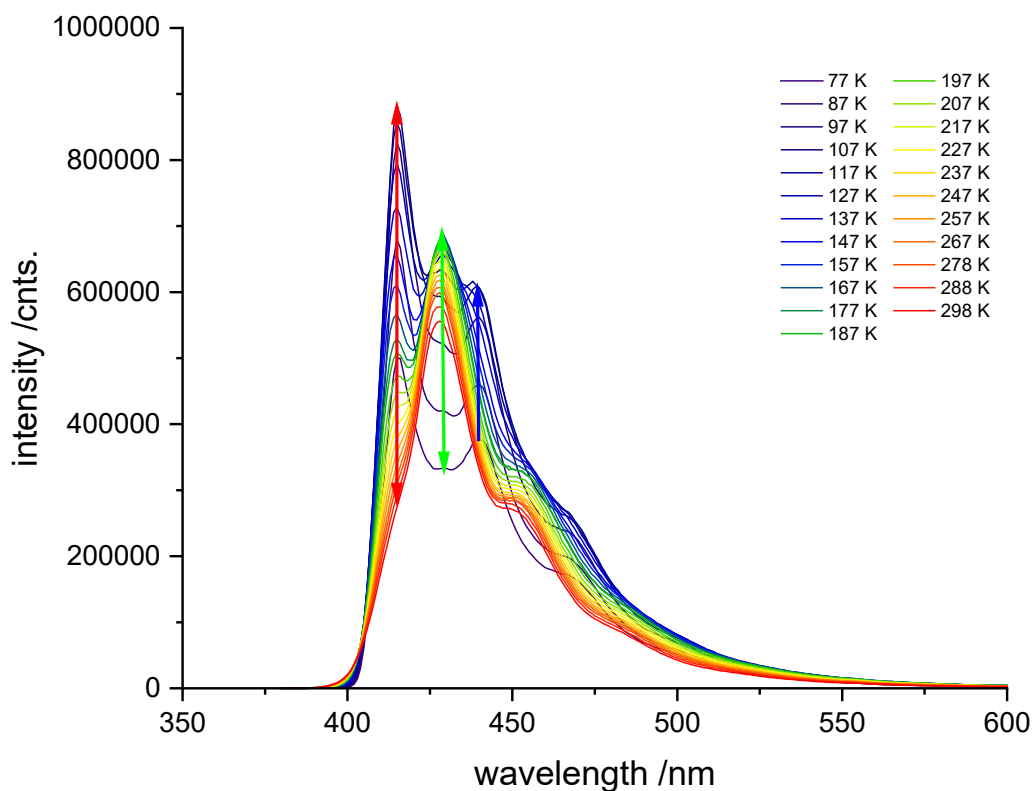

**Figure S 14.** Temperature-dependent fluorescence emission spectra of **2**.  $\lambda_{exc.} = 370$  nm. The colored arrows indicate the evolution of the respective fitted peaks with increasing temperature (red: Peak 1; green: Peak 2; blue: Peak 3).

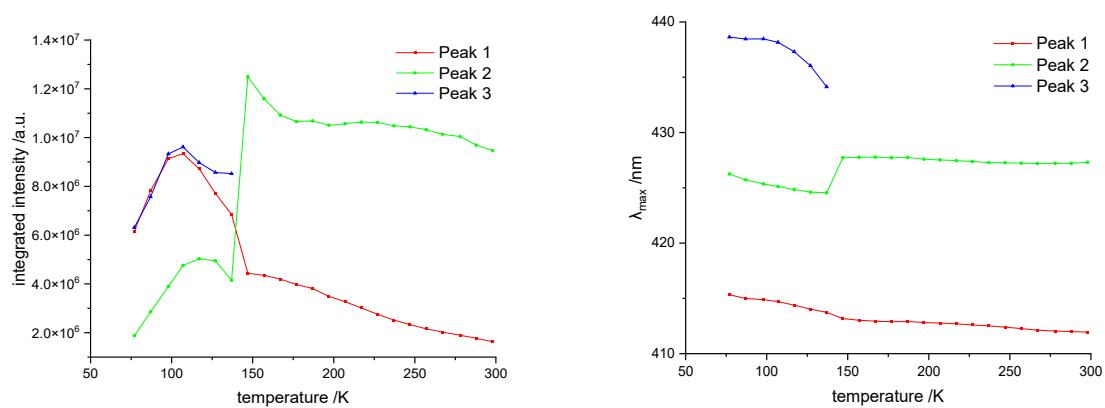

**Figure S 15.** Temperature dependence of the integrated intensity (left) and  $\lambda_{max}$  (right) of the fitted Peaks 1, 2 and 3 for **2**.

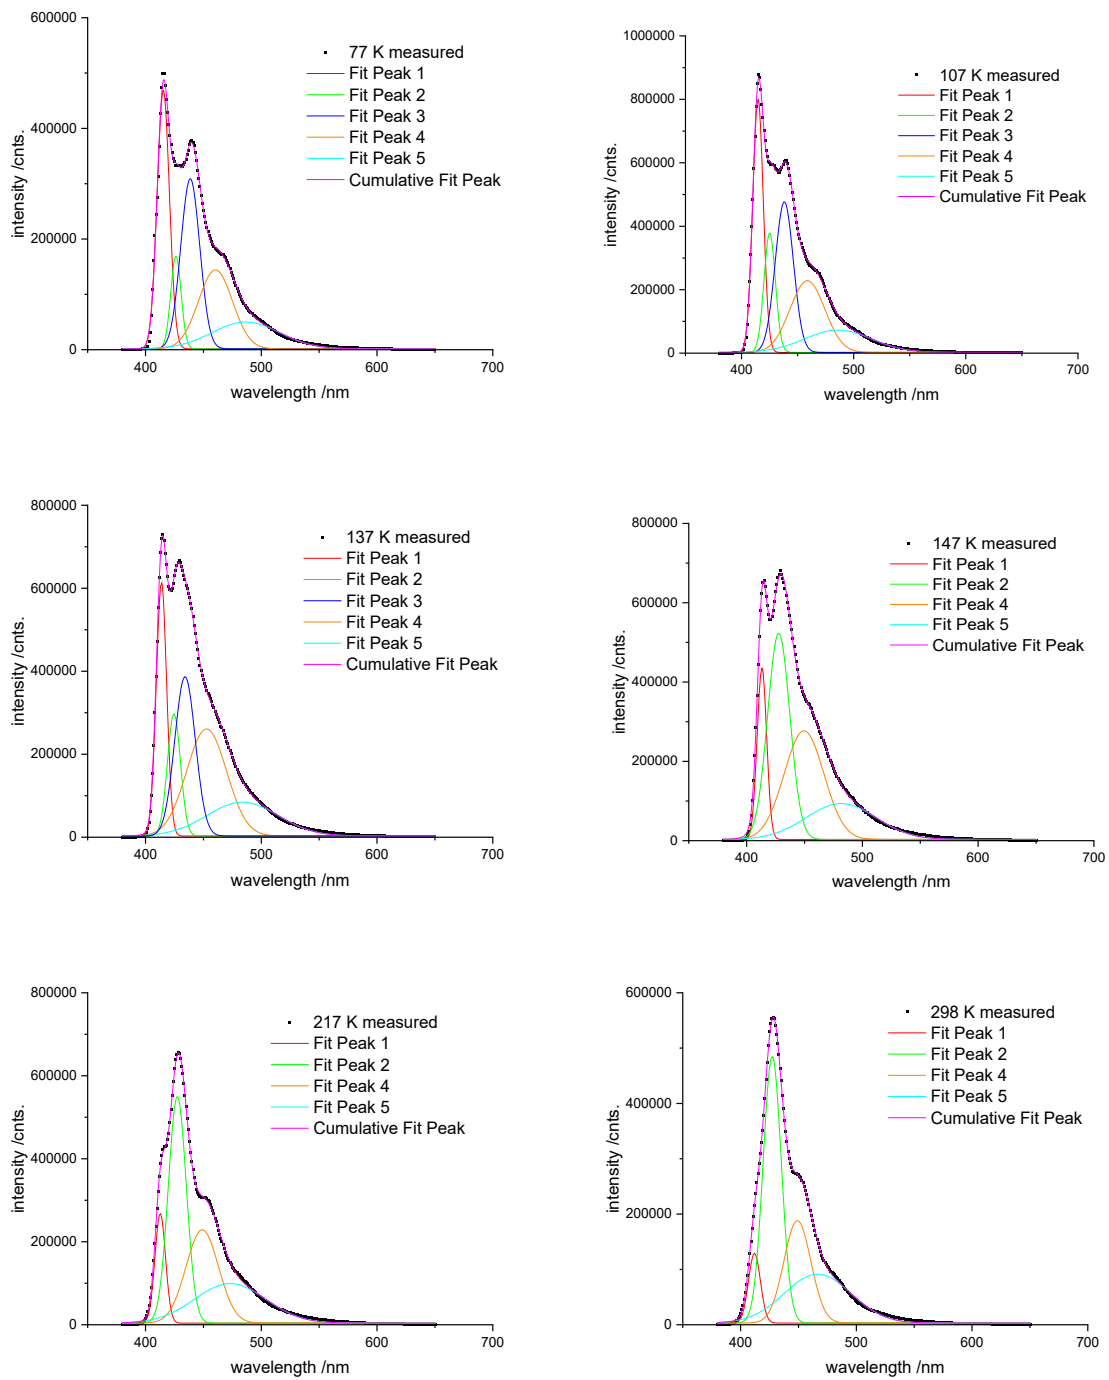

**Figure S 16.** Selected emission spectra at different temperatures of **2** fitted with multiple Gaussian functions.

### Coordination Compound 3

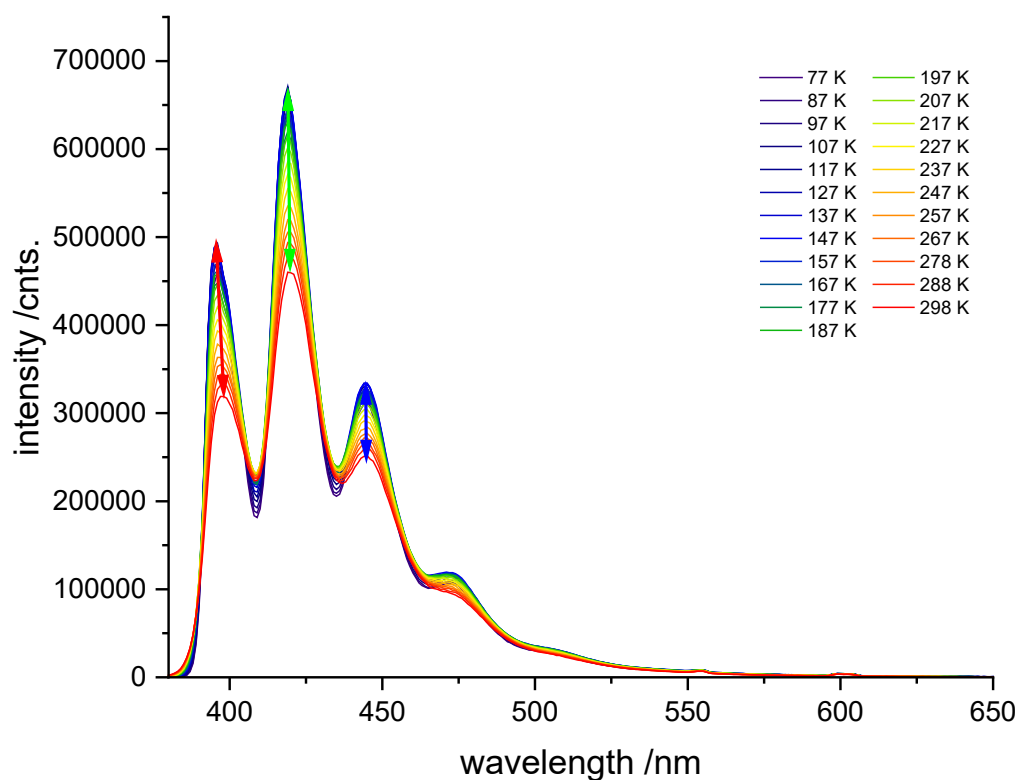

**Figure S17.** Temperature-dependent fluorescence emission spectra of **3**.  $\lambda_{\text{exc.}} = 370$  nm. The colored arrows indicate the evolution of the respective fitted peaks with increasing temperature (red: Peak 1; green: Peak 2; blue: Peak 3).

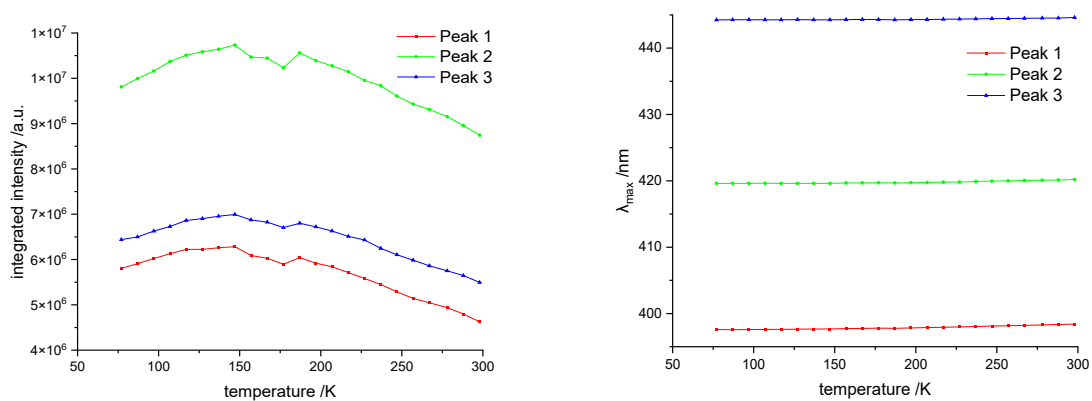

**Figure S18.** Temperature dependence of the integrated intensity (left) and  $\lambda_{\text{max}}$  (right) of the fitted Peaks 1, 2 and 3 for **3**.

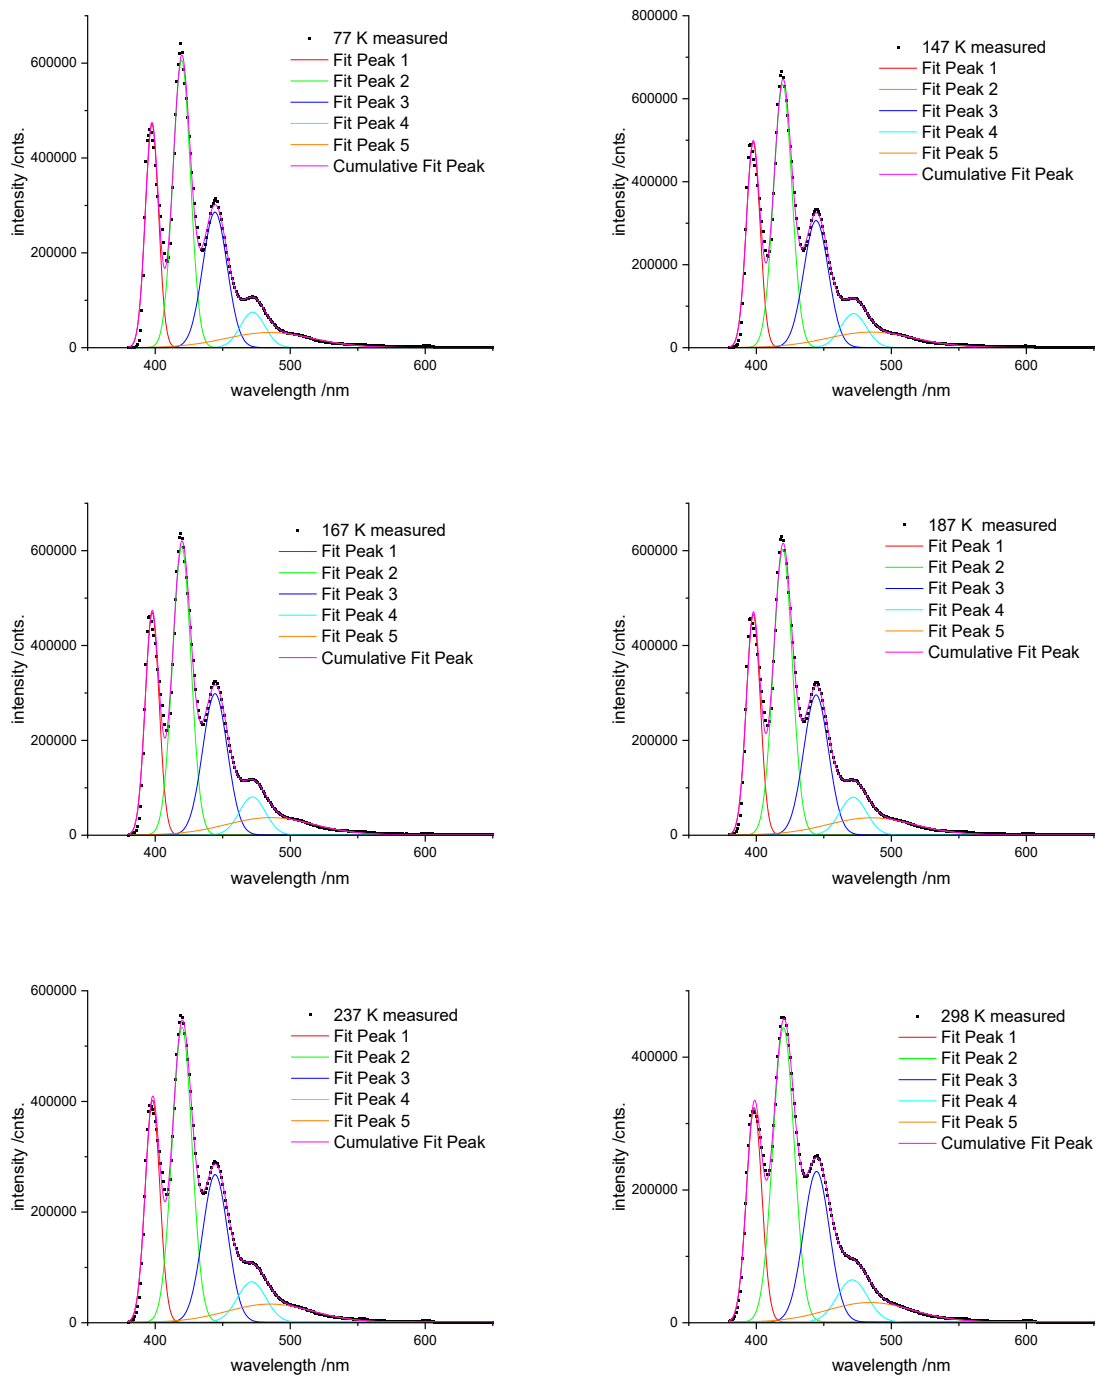

Figure S 19. Selected emission spectra at different temperatures of **3** fitted with five Gaussian functions.

## Spectral Overlap of Absorption and Emission Spectra

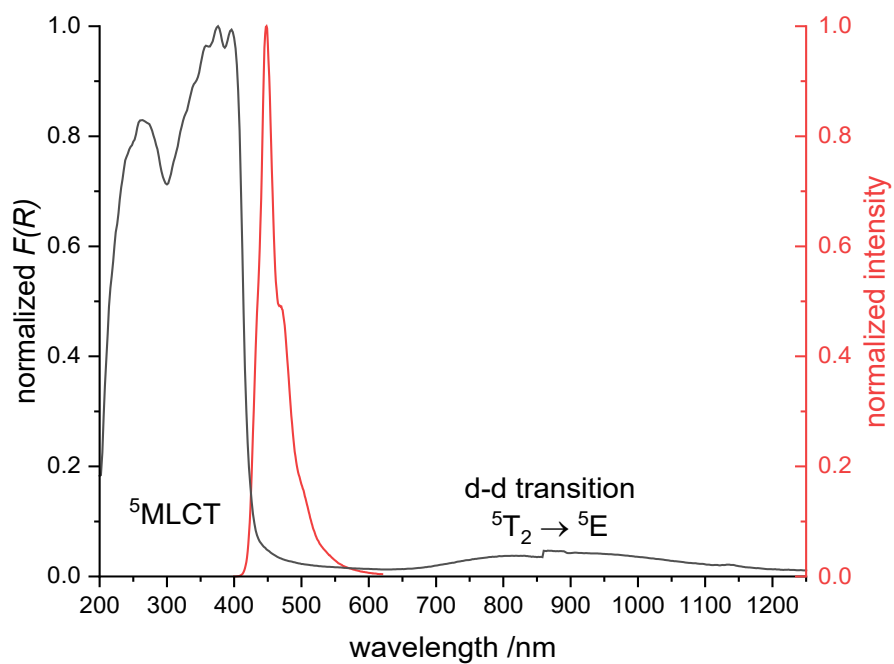

**Figure S 20.** Room temperature absorption (black) and fluorescence emission spectra (red) of **2**; excitation at 370 nm.

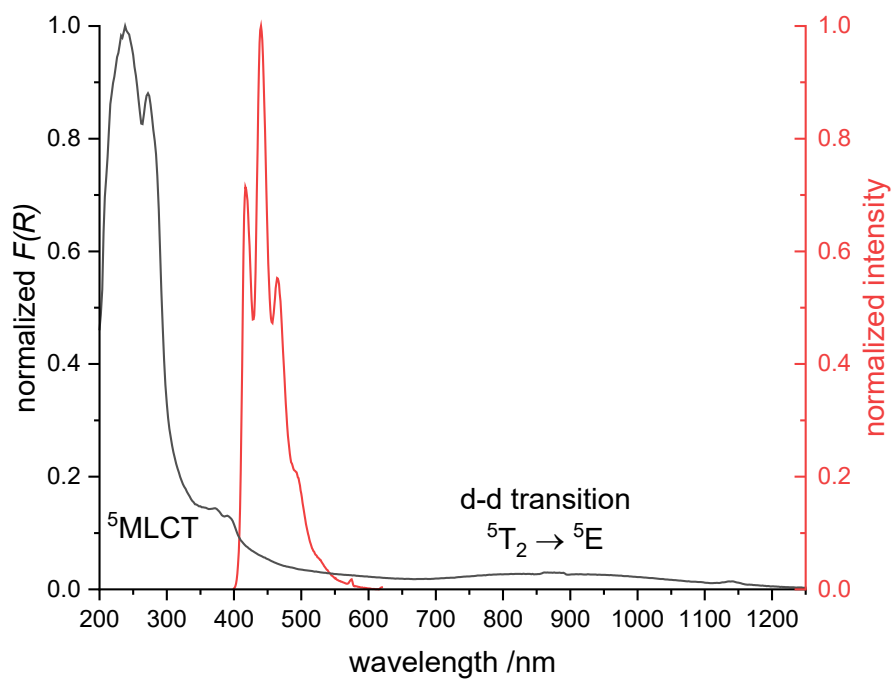

**Figure S 21.** Room temperature absorption (black) and fluorescence emission spectra (red) of **3**; excitation at 370 nm.

## Magnetic Measurements

Magnetic measurements were performed using a Physical Property Measurement System (Quantum Design). The measurement setup employed a vibrating sample magnetometer (VSM) insert, and brass sample holders with polypropylene powder containers. The magnetic moment was measured by applying an external field of 1 T, first in cooling mode from 300 K to 10 K, and subsequently in heating mode from 10 K to 380 K, with data collection in 5 K steps after a thermal stabilization of 1 s and a sweeping rate of 10 K/min (settle mode). Corrections for the diamagnetic contribution of the sample holder were applied by subtracting results of blank measurements and contributions of the ligand by using tabulated Pascal's constants.

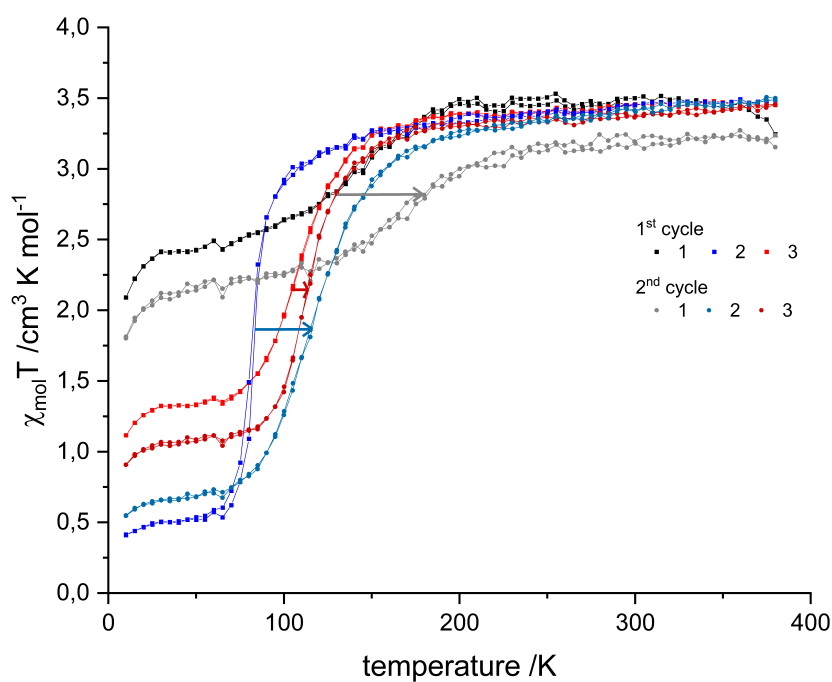

**Figure S 22.** Two cycles of temperature-dependent magnetic susceptibility measurements for **1-3**.

## Thermal Analysis

The TG/DSC analysis was performed on a NETZSCH STA 449 F1 Jupiter with a heating rate of 5 °Cmin<sup>-1</sup> from 25 to 210 °C under an nitrogen atmosphere. The sample was prepared by weighing approx. 9 mg in an aluminium crucible and crimping it with the responding cover. The measurement was calibrated with an empty, but crimped crucible running with the respective temperature scan.

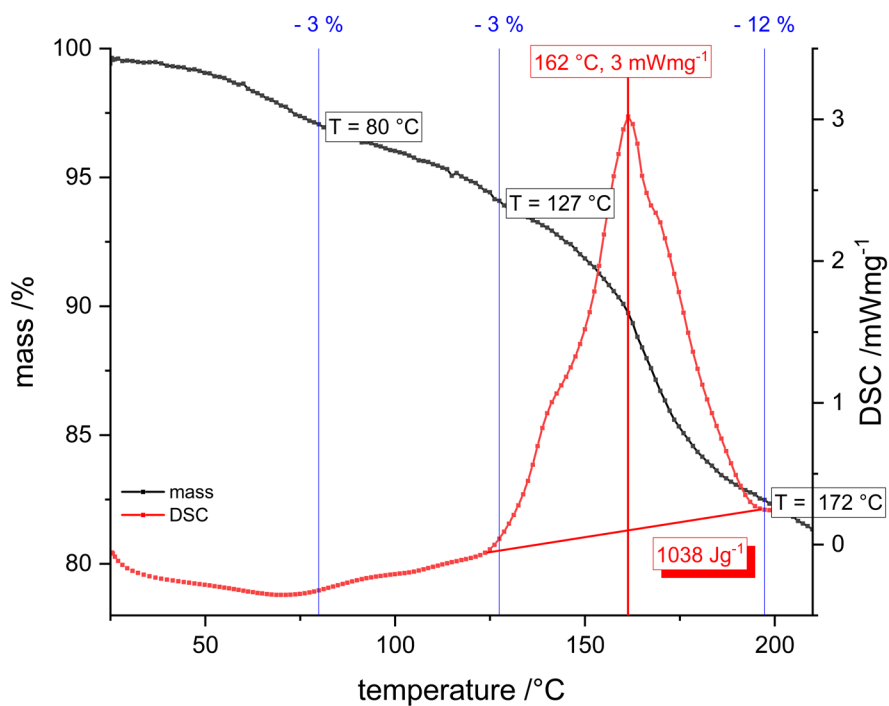

**Figure S 23:** The TGA and DSC curves of compound **1** with the approx. mass losses of CH<sub>3</sub>CN (2 x 3 %) and ClO<sub>4</sub><sup>-</sup> (12 %), with an exothermic peak maximum at 162 °C and an enthalpy of 1038 Jg<sup>-1</sup>.

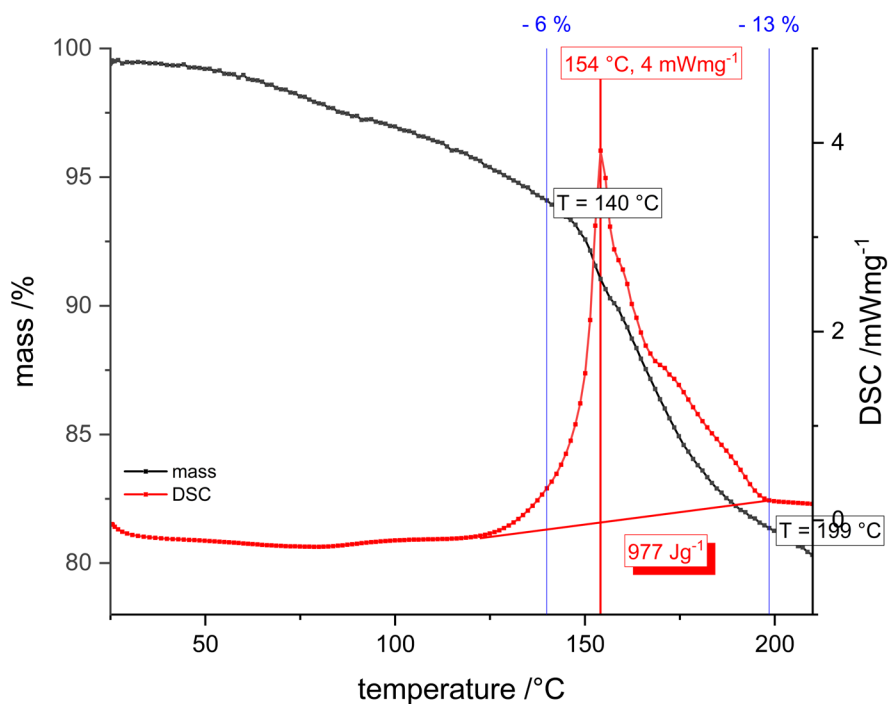

**Figure S 24:** The TGA and DSC curves of compound **2** with the approx. mass losses of  $\text{CH}_3\text{CN}$  (6 %) and  $\text{ClO}_4^-$  (13 %), with an exothermic peak maximum at 154 °C and an enthalpy of 977  $\text{Jg}^{-1}$ .

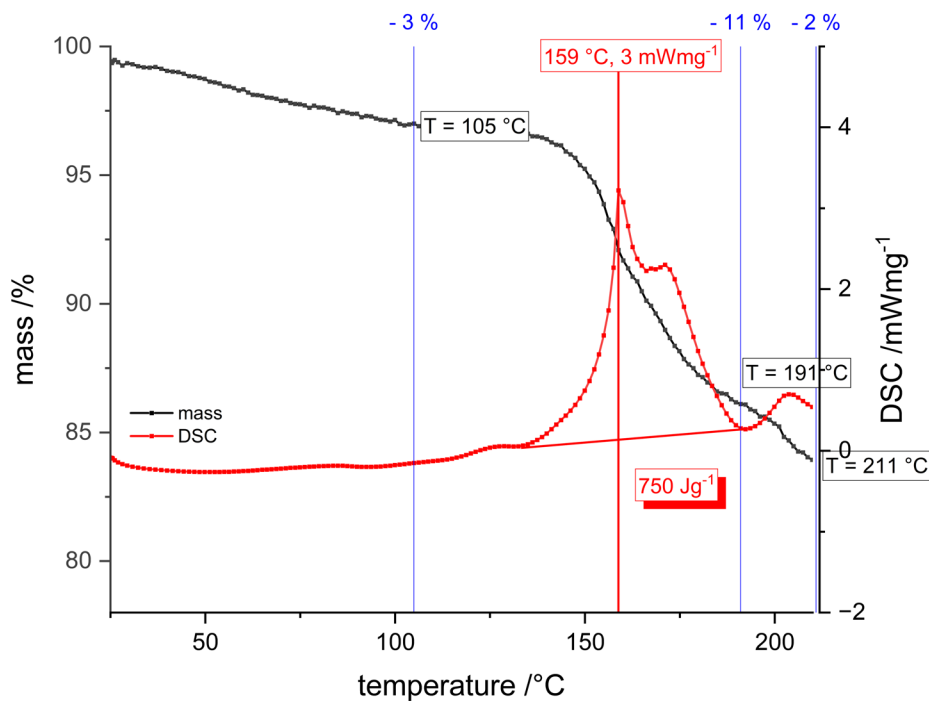

**Figure S 25:** The TGA and DSC curves of compound **3** with the approx. mass losses of  $\text{CH}_3\text{CN}$  (1 x 3 %) and  $\text{ClO}_4^-$  (11 %), with an exothermic peak maximum at 159 °C and an enthalpy of 750  $\text{Jg}^{-1}$ .

## XRPD Measurements

Powder X-ray diffraction experiments were performed on an “Empyrean” (Panalytical) diffractometer using Cu K- $\alpha$  radiation, a primary beam filter (Bragg-Brentano HD), a fixed  $\frac{1}{2}^\circ$  divergence slit, a 0.04 rad soller slit and a GaliPIX3D detector. Finely powdered bulk samples were positioned on a silicon single crystal cut along the (711) plane. It was measured from  $3^\circ$  to  $45^\circ$   $2\theta$  with a step size of  $0.014^\circ$ .

Diffractograms of **L2** and **1-3** were evaluated using the PANalytical program suite HighScorePlus<sup>3</sup>; background correction was applied, and a calculated diffraction pattern derived from single-crystal CIF data was subsequently refined via Rietveld analysis against the measured XRPD data to confirm phase purity and structural consistency.

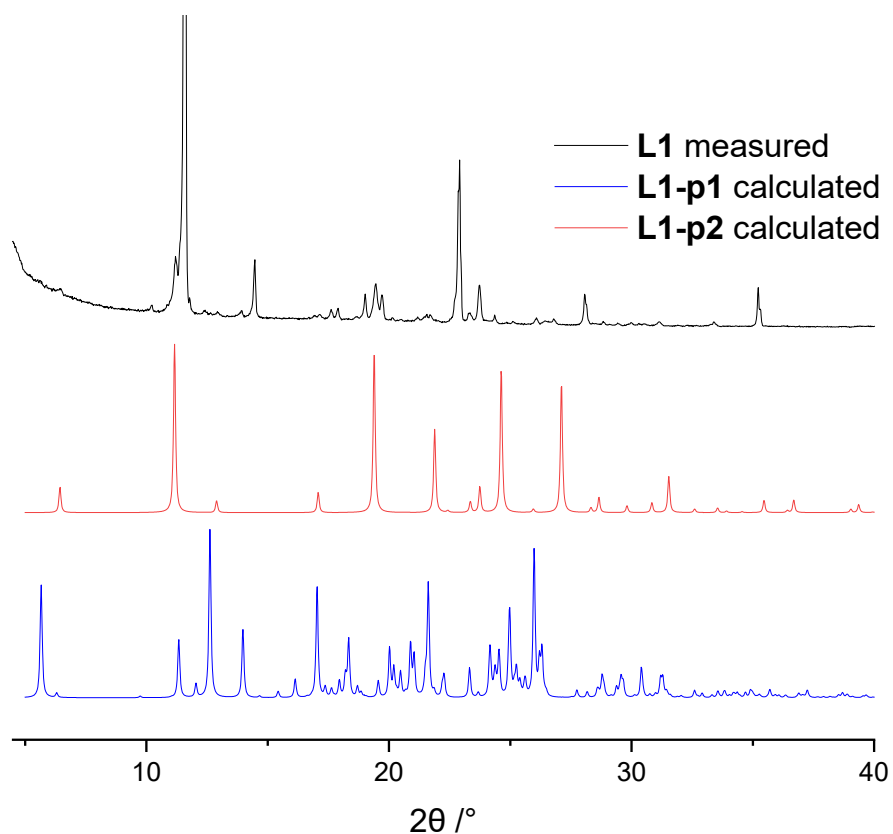

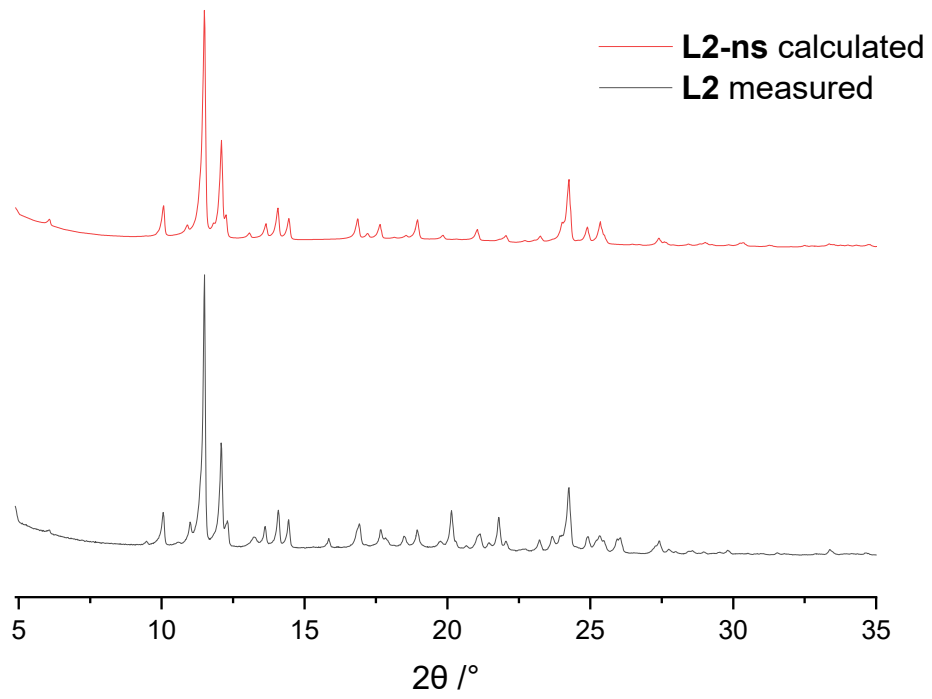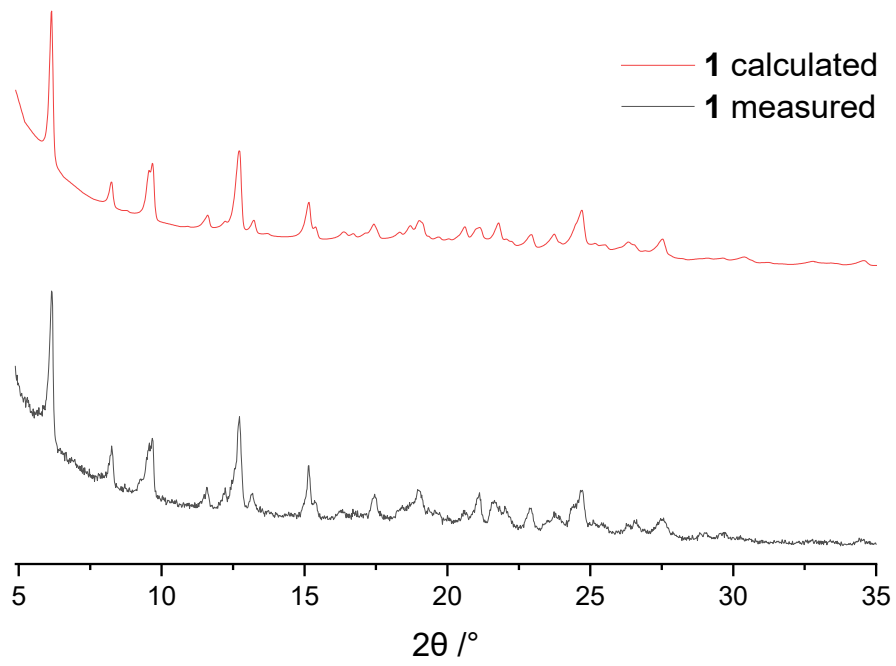

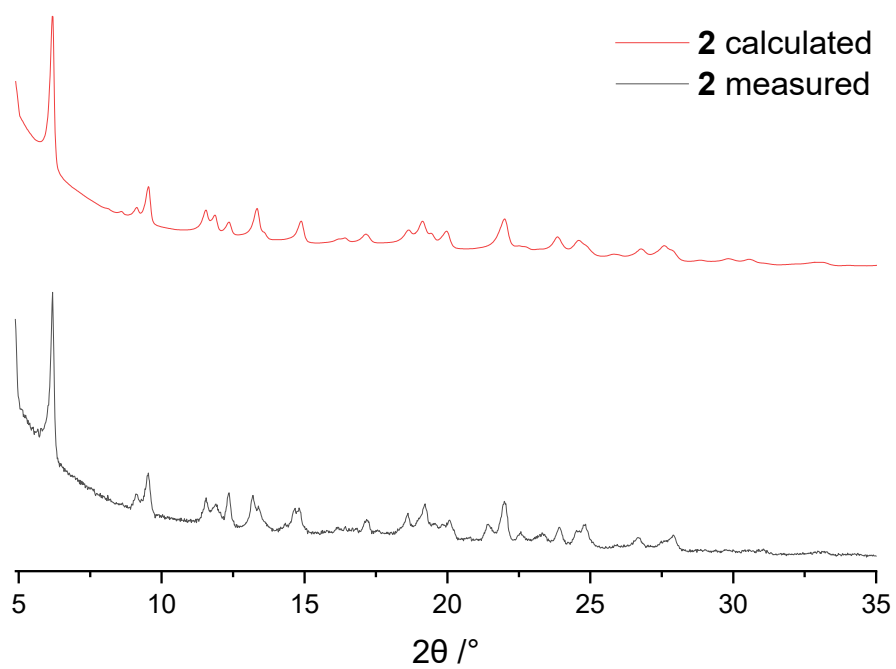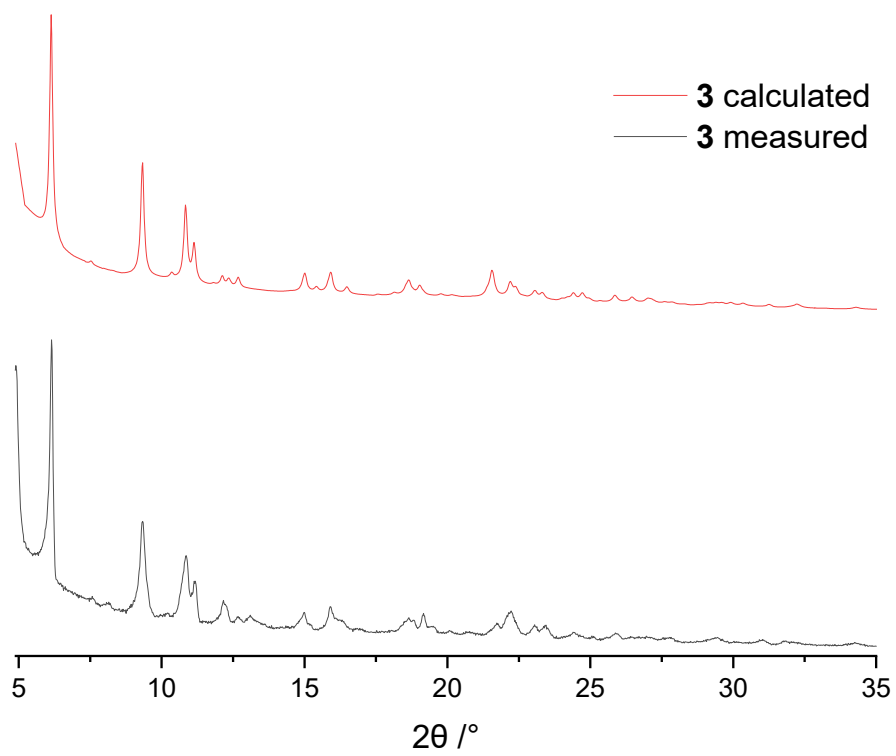

## X-Ray Structure Determination

X-ray diffraction data of **1**, **2**, **L1-p1**, **L1-p2**, **L2-ns**, **L2-s1**, **L2-s2** (CSD 2427600–2427606) were collected at T = 100 K in a dry stream of nitrogen on a STOE STADIVARI diffractometer system equipped with a Dectris Eiger CdTe hybrid photon counting detector using Cu-K $\alpha$  radiation ( $\lambda = 1.54186 \text{ \AA}$ ). Data were reduced with X-Area (X-Area 1.31.194.0, LANA 2.8.4; STOE & Cie GmbH, Darmstadt, Germany, 2024). **L1-p1** and **L2-ns** were treated as twins with partial reflection overlap (HKL5-style reflection file). An absorption correction was applied with the multi-scan approach implemented in LANA. The structures were solved by the dual-space approach implemented in SHELXT<sup>4</sup> and refined against F<sup>2</sup> with SHELXL<sup>5</sup>.

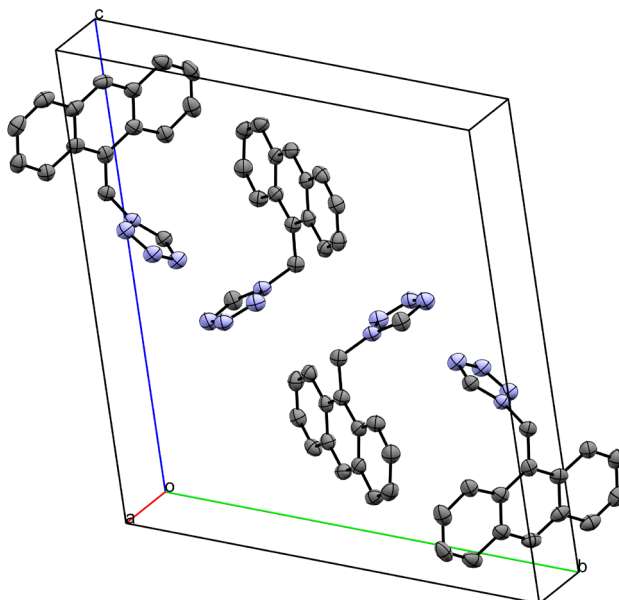

**Figure S 26.** Crystal packing of **L1-p1** (ellipsoids: 50 % probability level; atom color code: grey...C, blue...N; H-atoms are omitted for clarity).

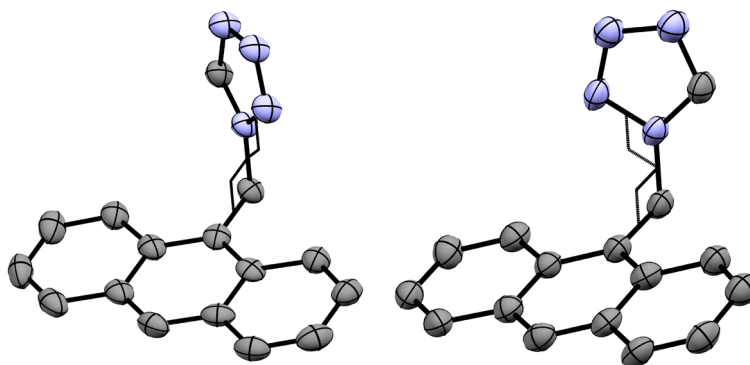

**Figure S 27.** Side view of the molecular structures of the two different conformers in **L1-p1**, showing the orientation of the tz moiety (ellipsoids: 50 % probability level; atom color code: grey...C, blue...N; H-atoms are omitted for clarity).

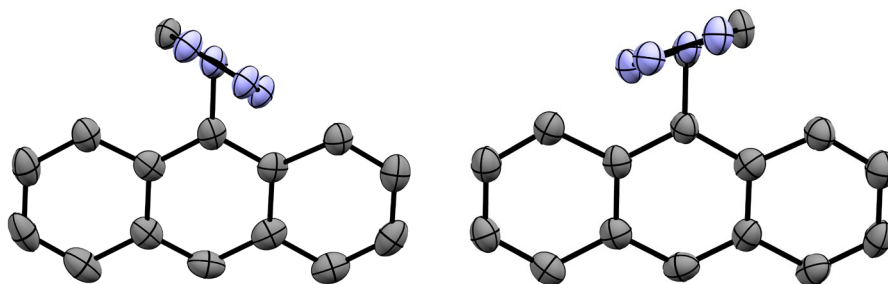

**Figure S 28.** Top view of the molecular structures of the two different conformers in **L1-p1**, showing the orientation of the tz moiety (ellipsoids: 50 % probability level; atom color code: grey...C, blue...N; H-atoms are omitted for clarity).

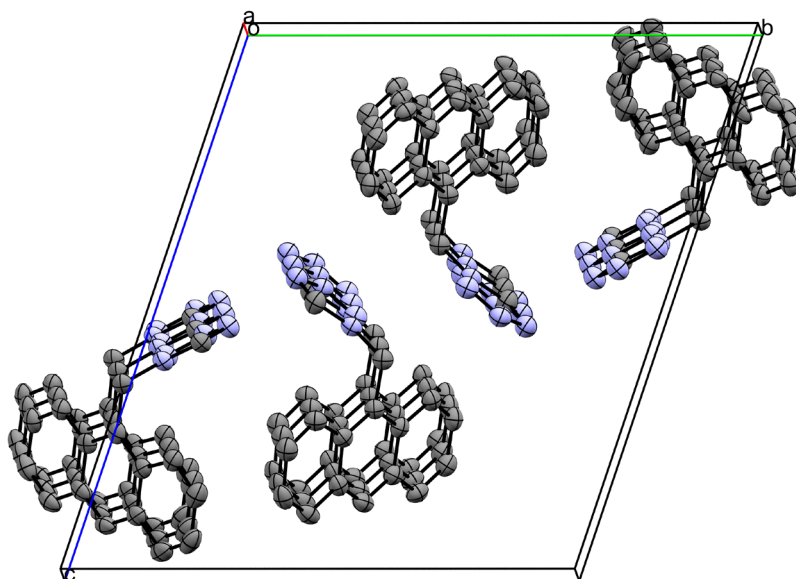

**Figure S 29.** Crystal packing with co-planar arrangement of **L1-p1** viewed along the crystallographic *a*-axis (ellipsoids: 50 % probability level; atom color code: grey...C, blue...N; H-atoms are omitted for clarity).

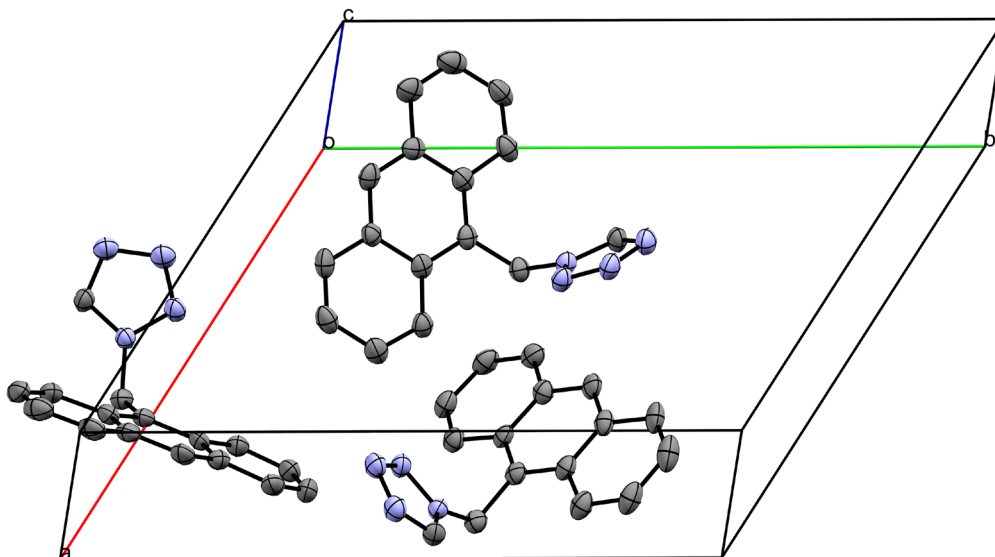

**Figure S 30.** Crystal packing of **L1-p2** (ellipsoids: 50 % probability level; atom color code: grey...C, blue...N; H-atoms are omitted for clarity).

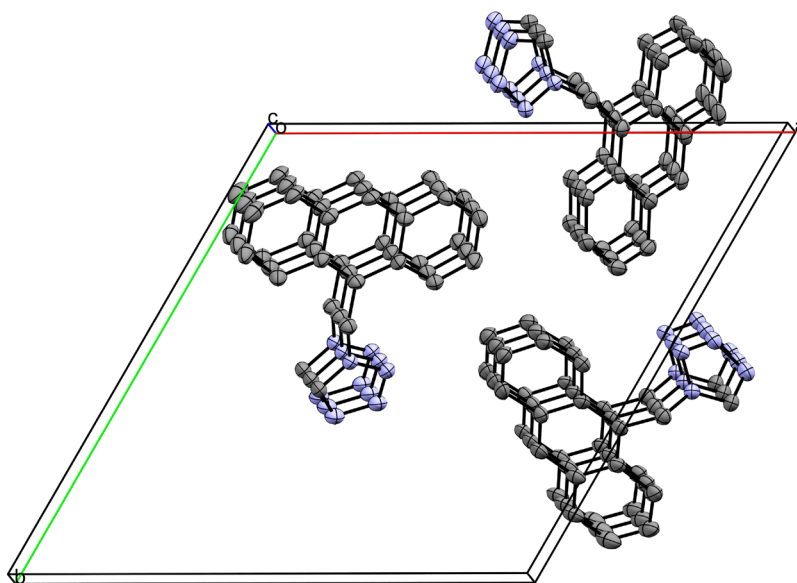

**Figure S 31.** Crystal packing with co-planar arrangement of **L1-p2** viewed along the crystallographic *c*-axis (ellipsoids: 50 % probability level; atom color code: grey...C, blue...N; H-atoms are omitted for clarity).

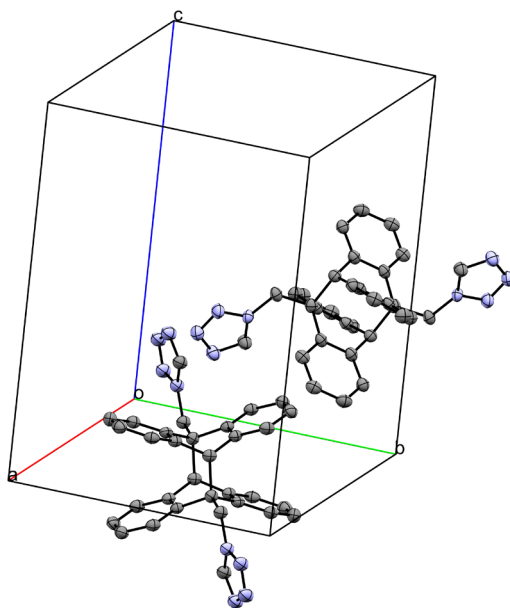

**Figure S 32.** Crystal packing of **L2-ns**, showing the two different conformers of **L2** (ellipsoids: 50 % probability level; atom color code: grey...C, blue...N; H-atoms are omitted for clarity).

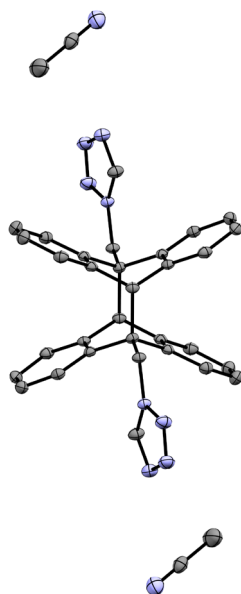

**Figure S 33.** Molecular structure of **L2-s1**, showing the relative positions of the two solvate molecules ( $\text{CH}_3\text{CN}$ ) (ellipsoids: 50 % probability level; atom color code: grey...C, blue...N; H-atoms are omitted for clarity).

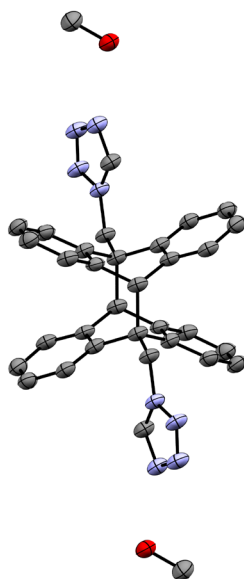

**Figure S 34.** Molecular structure of **L2-s2**, showing the relative positions of the two solvate molecules ( $\text{CH}_3\text{OH}$ ) (ellipsoids: 50 % probability level; atom color code: grey...C, blue...N, red...O; H-atoms are omitted for clarity).

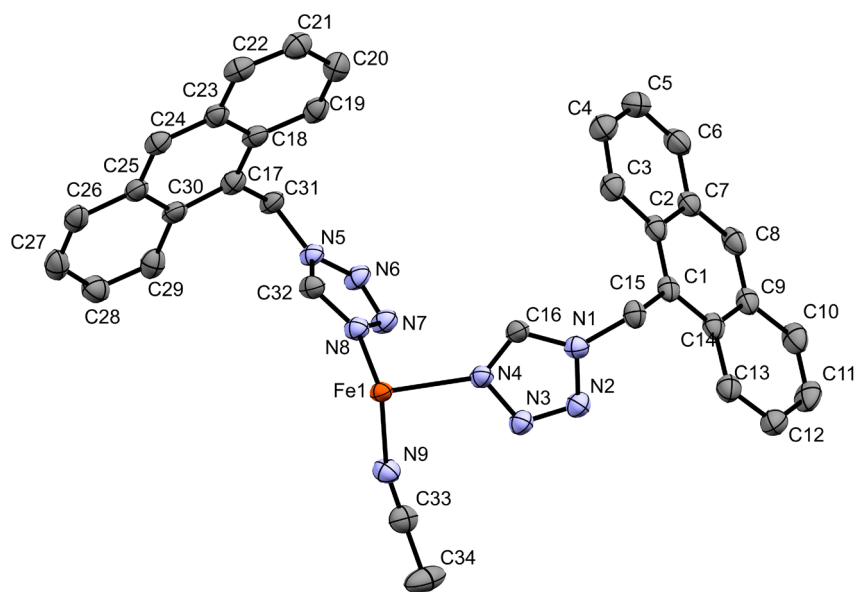

**Figure S 35.** Asymmetric unit of coordination compound **1** with atomic number labeling, showing the two different conformers of **L1** (ellipsoids: 50 % probability level; atom color code: grey...C, blue...N, orange...Fe; H-atoms, solvate molecules and anion molecules are omitted for clarity).

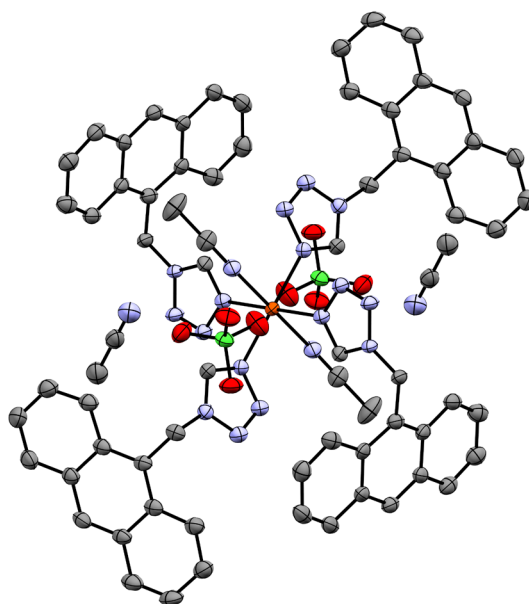

**Figure S 36.** Molecular structure of coordination compound **1**, showing the relative position of the solvate molecules ( $\text{CH}_3\text{CN}$ ) and the anion molecules ( $\text{ClO}_4^-$ ) (ellipsoids: 50 % probability level; atom color code: grey...C, blue...N, red...O, green...Cl, orange...Fe; H-atoms omitted for clarity).

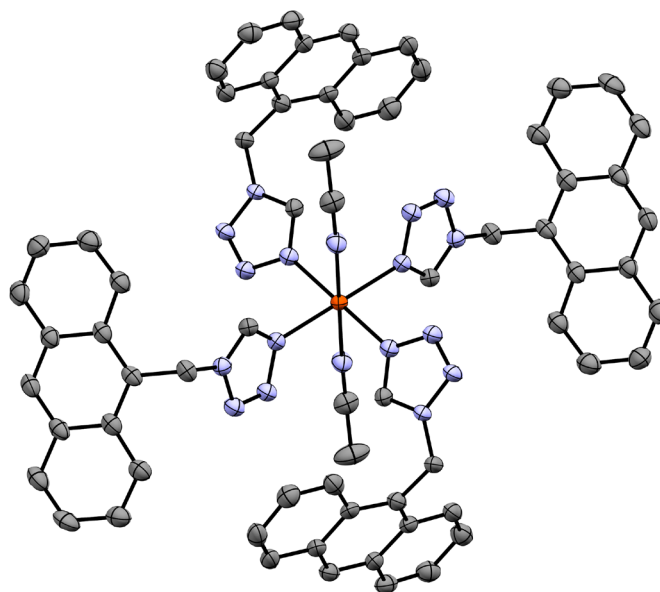

**Figure S 37.** Molecular structure of the mononuclear complex of coordination compound **1** (ellipsoids: 50 % probability level; atom color code: grey...C, blue...N, orange...Fe; H-atoms, solvate molecules and anion molecules are omitted for clarity).

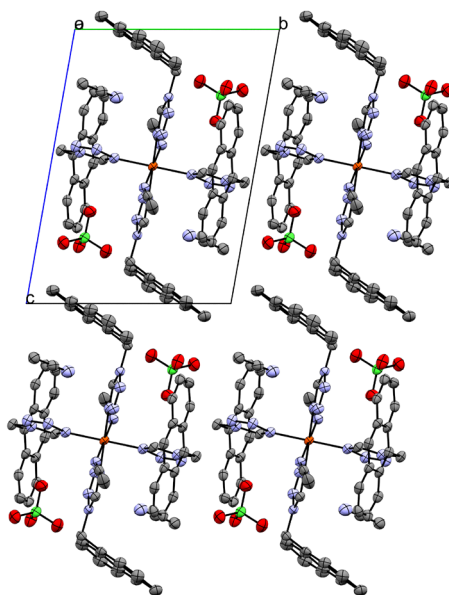

**Figure S 38.** Crystal packing of coordination compound **1** viewed along the crystallographic *a*-axis (ellipsoids: 50 % probability level; atom color code: grey...C, blue...N, red...O, green...Cl, orange...Fe; H-atoms omitted for clarity).

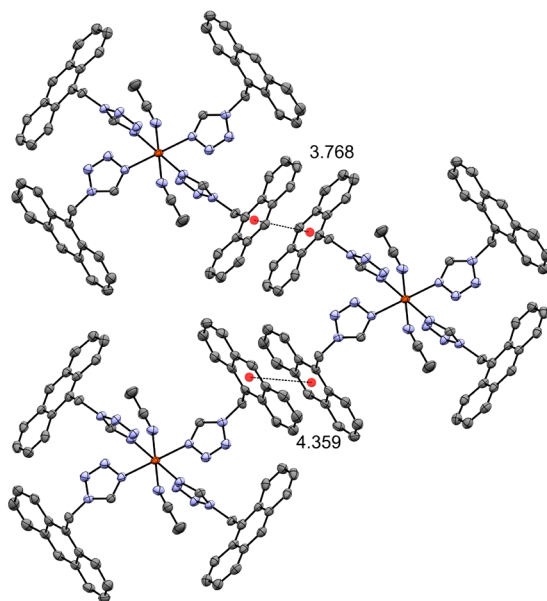

**Figure S 39.** Crystal packing of **1** with co-planar arrangement of anthracene moieties of the ligand **L1** of adjacent mononuclear complexes (ellipsoids: 50 % probability level; atom color code: grey...C, blue...N, orange...Fe; H-atoms, solvate molecules and anion molecules are omitted for clarity; interplane distance as dotted line (/ Å)).

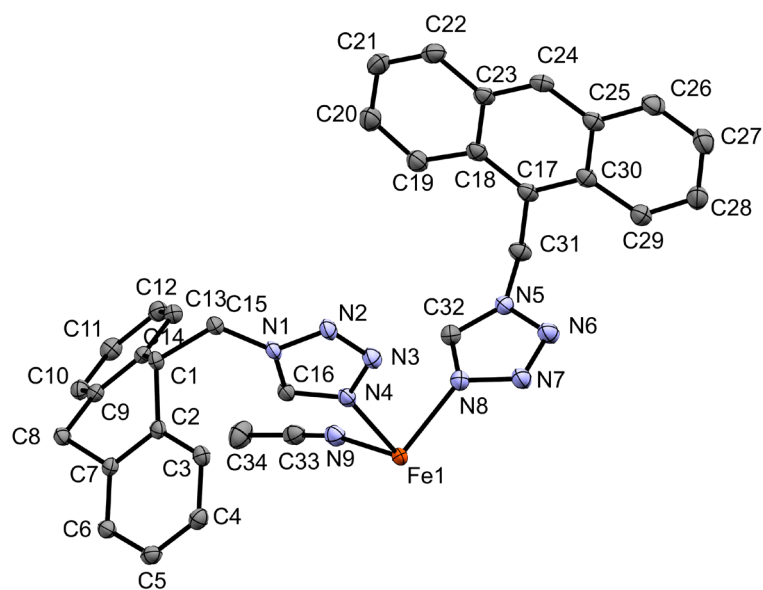

**Figure S 40.** Asymmetric unit of coordination compound **2** with atomic number labeling (ellipsoids: 50 % probability level; atom color code: grey...C, blue...N, orange...Fe; H-atoms, solvate molecules and anion molecules are omitted for clarity).

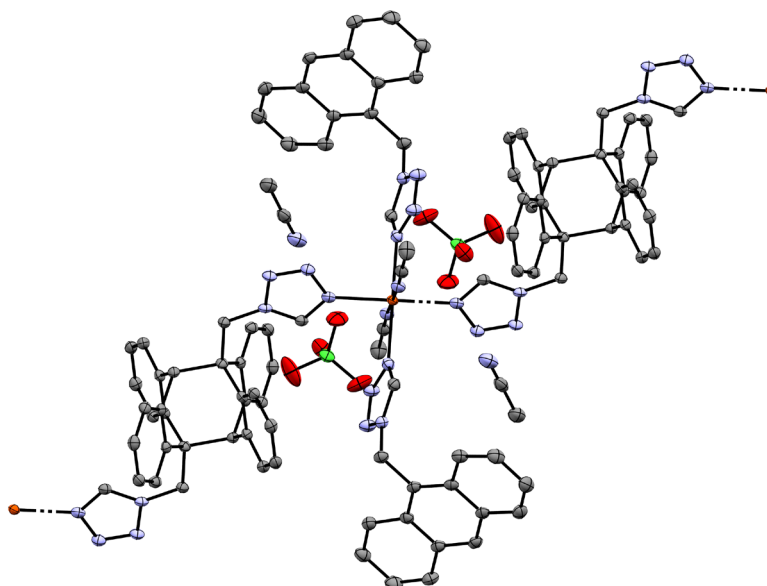

**Figure S 41.** Molecular structure of coordination compound **2**, showing the relative position of the solvate molecules ( $\text{CH}_3\text{CN}$ ) and the anion molecules ( $\text{ClO}_4^-$ ), as well as the bridging coordination mode of **L2** (ellipsoids: 50 % probability level; atom color code: grey...C, blue...N, red...O, green...Cl, orange...Fe; H-atoms omitted for clarity).

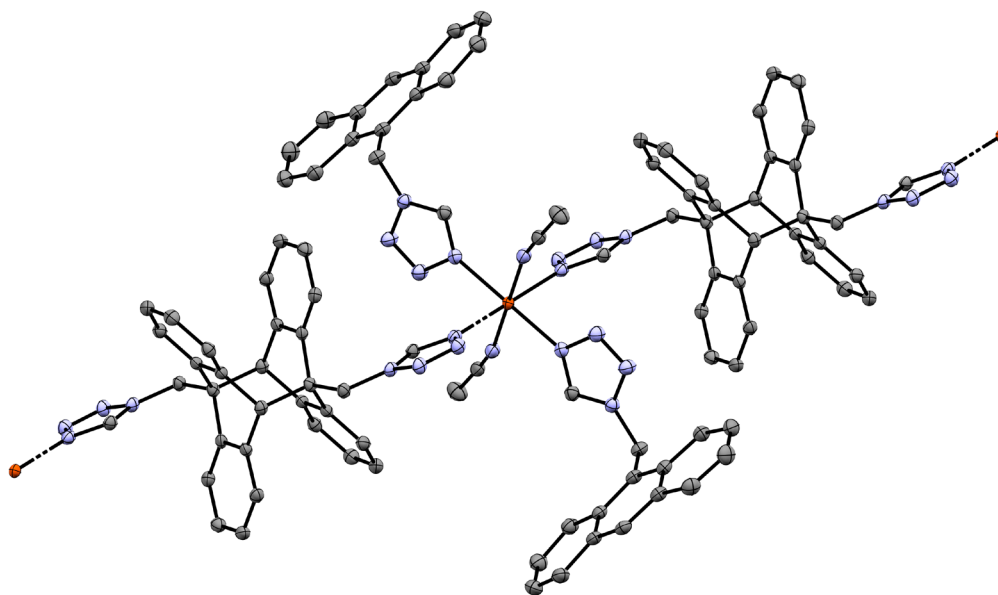

**Figure S 42.** Molecular structure of the 1D coordination polymer chain of coordination compound **2**, showing the bridging coordination mode of **L2** (ellipsoids: 50 % probability level; atom color code: grey...C, blue...N, orange...Fe; H-atoms, solvate molecules and anion molecules are omitted for clarity).

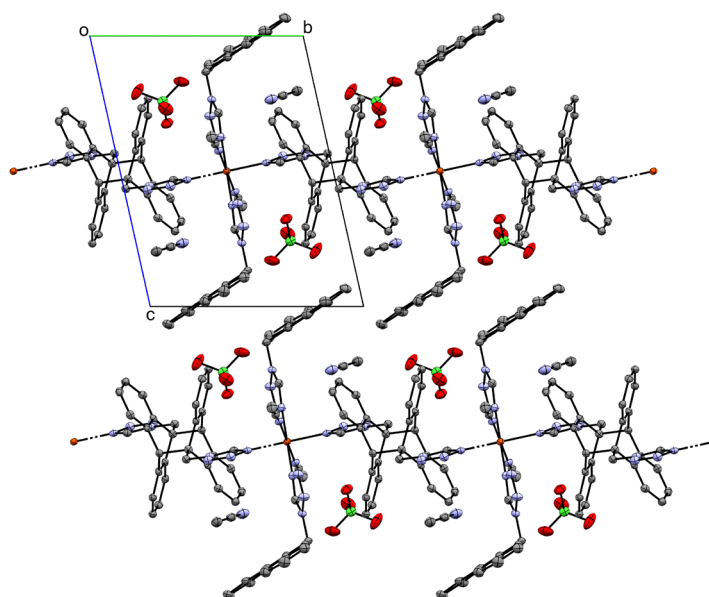

**Figure S 43.** Crystal packing of two parallel 1D coordination polymer chains of coordination compound **2** viewed along the crystallographic *a*-axis (ellipsoids: 50 % probability level; atom color code: grey...C, blue...N, red...O, green...Cl, orange...Fe; H-atoms omitted for clarity).

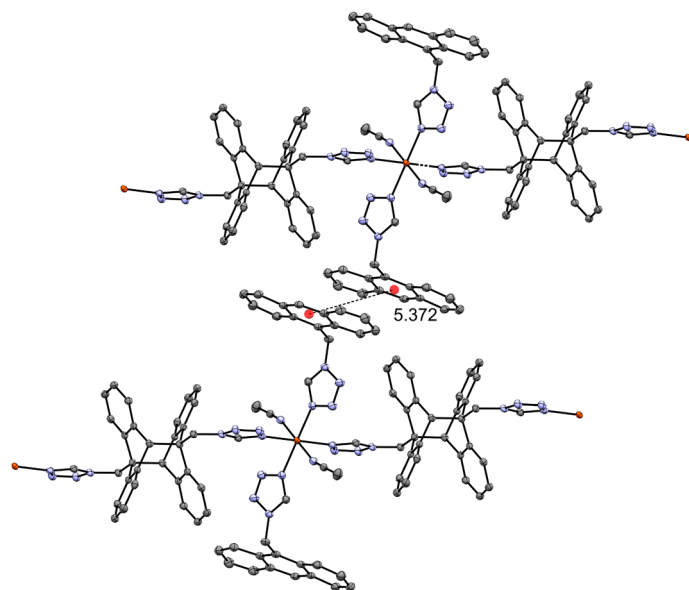

**Figure S 44.** Crystal packing of **2** with co-planar arrangement of anthracene moieties of the ligand **L1** of adjacent 1D coordination polymer chains (ellipsoids: 50 % probability level; atom color code: grey...C, blue...N, orange...Fe; H-atoms, solvate molecules and anion molecules are omitted for clarity; interplane distance as dotted line (*Å*)).

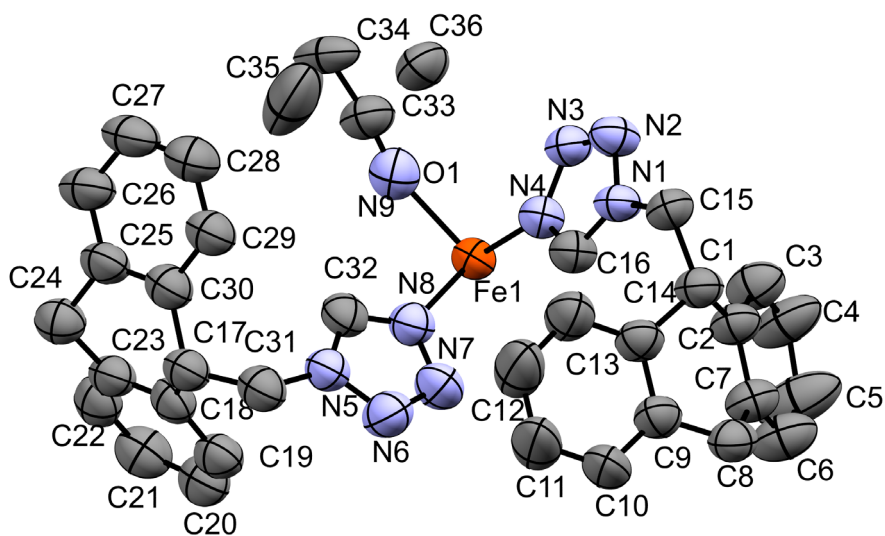

**Figure S 45.** Asymmetric unit of coordination compound **3** with atomic number labeling (ellipsoids: 50 % probability level; atom color code: grey...C, blue...N, orange...Fe; H-atoms, solvate molecules and anion molecules are omitted for clarity).

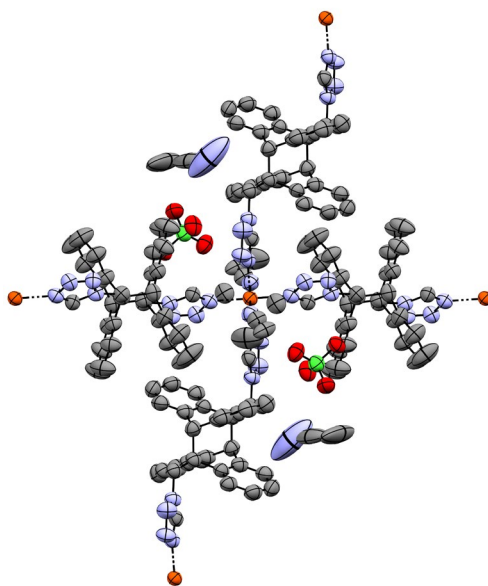

**Figure S 46.** Molecular structure of coordination compound **3**, showing the relative position of the solvate molecules (CH<sub>3</sub>CN) and the anion molecules (ClO<sub>4</sub><sup>-</sup>), as well as the bridging coordination mode of **L2** (ellipsoids: 50 % probability level; atom color code: grey...C, blue...N, red...O, green...Cl, orange...Fe; H-atoms omitted for clarity).

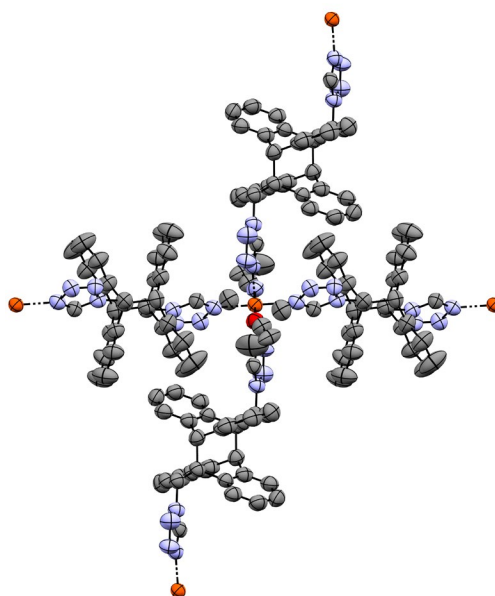

**Figure S 47.** Molecular structure of the 2D coordination polymer chain of coordination compound **3**, showing the bridging coordination mode of **L2** (ellipsoids: 50 % probability level; atom color code: grey...C, blue...N, orange...Fe; H-atoms, solvate molecules and anion molecules are omitted for clarity).

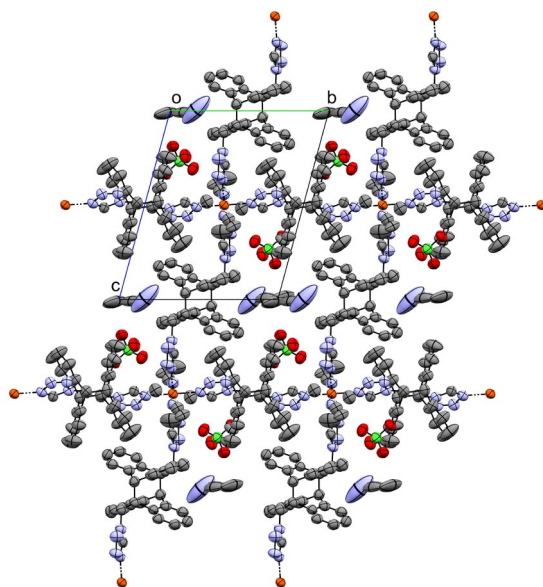

**Figure S 48.** Crystal packing of the 2D coordination polymer layer of coordination compound **2** viewed along the crystallographic *a*-axis (ellipsoids: 50 % probability level; atom color code: grey...C, blue...N, red...O, green...Cl, orange...Fe; H-atoms omitted for clarity).

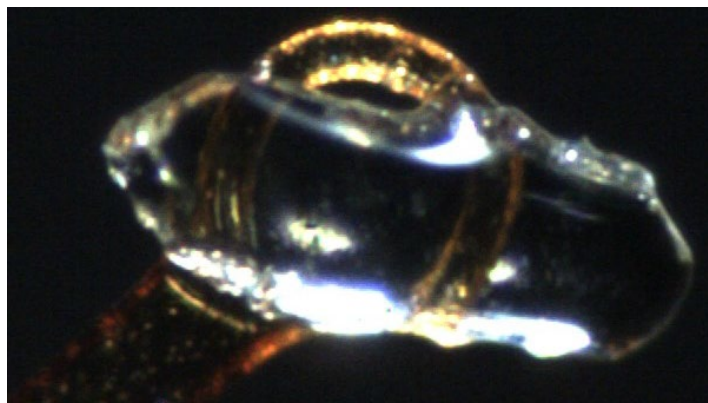

**Figure S 49.** SC of **1** mounted on the crystal pin before irradiation with a 365 nm LED.

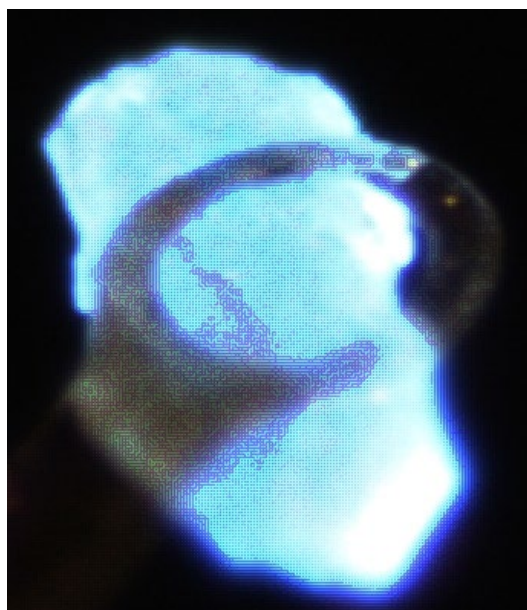

**Figure S 50.** SC of **1** mounted on the crystal pin during irradiation with a 365 nm LED.

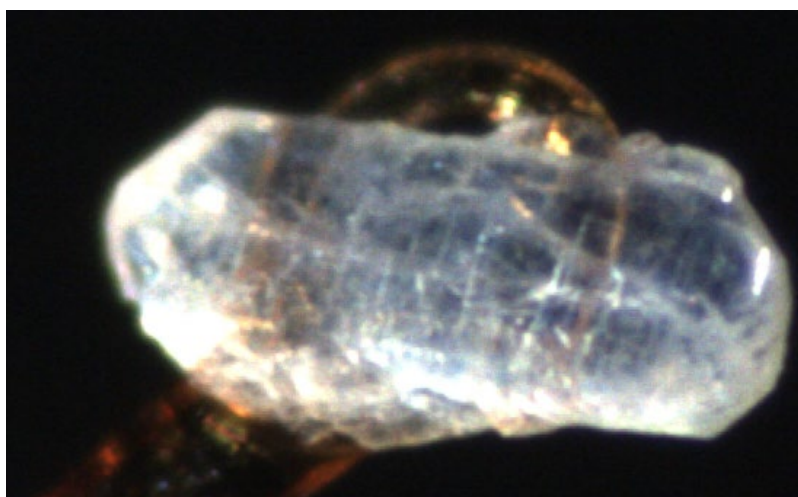

**Figure S 51.** SC of **2** mounted on the crystal pin after irradiation of a SC of **1** with a 365 nm LED with clearly visible fragmentation.

**Table 1:** Hydrogens bond distances of polymorph **L1-p1**

| donor<br>atom (D) | H<br>atom | acceptor<br>atom (A) | D-H<br>/ Å | H...A<br>/ Å | D...A<br>/ Å | D-H...A<br>/° |
|-------------------|-----------|----------------------|------------|--------------|--------------|---------------|
| C32               | H32       | N4                   | 0.93       | 4.48         | 3.143(8)     | 129           |
| C16               | H16       | N3                   | 0.93       | 2.35         | 3.265(7)     | 168           |
| C13               | H13       | N2                   | 0.93       | 2.60         | 3.429(8)     | 149           |
| C31               | H31A      | N6                   | 0.97       | 2.62         | 3.562(7)     | 165           |
| C32               | H32       | N7                   | 0.93       | 2.50         | 3.317(8)     | 146           |

**Table 2:** Hydrogen bond distances of polymorph L1-p2

| donor<br>atom (D) | H<br>atom | acceptor<br>atom (A) | D-H<br>/ Å | H...A<br>/ Å | D...A<br>/ Å | D-H...A<br>/ ° |
|-------------------|-----------|----------------------|------------|--------------|--------------|----------------|
| C16               | H16       | N4                   | 0.95       | 2.51         | 3.373(9)     | 151            |
| C15               | H15A      | N2                   | 0.99       | 2.49         | 3.366(7)     | 147            |

**Table 3:** Octahedral distortion parameters of compound 1

|        |           |
|--------|-----------|
| <D>    | 2.165899  |
| ζ      | 0.117186  |
| Δ      | 0.000107  |
| Σ      | 27.412707 |
| Θ      | 73.871601 |
| Volume | 13.500000 |

**Table 4:** Octahedral distortion parameters of compound 2

|        |           |
|--------|-----------|
| <D>    | 2.141788  |
| ζ      | 0.094145  |
| Δ      | 0.000061  |
| Σ      | 21.122430 |
| Θ      | 50.718178 |
| Volume | 13.080000 |

**Table 5:** Octahedral distortion parameters of compound 3

|        |          |
|--------|----------|
| <D>    | 2.1205   |
| ζ      | 0.103597 |
| Δ      | 0.000080 |
| Σ      | 18.2745  |
| Θ      | 53.1683  |
| Volume | 12.6900  |

**Table 6:** Crystal data of 1, 2, L1-p1, L1-p2

| Chemical formula                   | C <sub>68</sub> H <sub>54</sub> FeN <sub>18</sub> +2(ClO <sub>4</sub> )+2(C <sub>2</sub> H <sub>3</sub> N) | C <sub>68</sub> H <sub>54</sub> FeN <sub>18</sub> +2(ClO <sub>4</sub> )+2(C <sub>2</sub> H <sub>3</sub> N) | C <sub>16</sub> H <sub>12</sub> N <sub>4</sub> | C <sub>16</sub> H <sub>12</sub> N <sub>4</sub> |
|------------------------------------|------------------------------------------------------------------------------------------------------------|------------------------------------------------------------------------------------------------------------|------------------------------------------------|------------------------------------------------|
| <i>M<sub>r</sub></i>               | 1460.15                                                                                                    | 1460.15                                                                                                    | 260.30                                         | 260.30                                         |
| Crystal system, space group        | Triclinic, <i>P</i> $\bar{1}$                                                                              | Triclinic, <i>P</i> $\bar{1}$                                                                              | Triclinic, <i>P</i> $\bar{1}$                  | Trigonal, <i>P</i> 3 <sub>2</sub>              |
| Temperature (K)                    | 100                                                                                                        | 100                                                                                                        | 100                                            | 100                                            |
| <i>a</i> , <i>b</i> , <i>c</i> (Å) | 10.2758 (4), 11.0058 (4), 15.2855 (6)                                                                      | 10.4902 (3), 11.0975 (3), 14.7129 (5)                                                                      | 5.3803 (5), 14.8209 (13), 16.6040 (14)         | 15.8450 (7), 15.8450 (7), 4.2481 (2)           |
| <i>α</i> , <i>β</i> , <i>γ</i> (°) | 99.189 (3), 101.318 (3), 93.090 (3)                                                                        | 76.991 (2), 78.172 (2), 86.627 (2)                                                                         | 108.530 (7), 96.770 (7), 91.608 (7)            | 90, 90, 120                                    |
| <i>V</i> (Å <sup>3</sup> )         | 1666.82 (11)                                                                                               | 1633.26 (9)                                                                                                | 1243.6 (2)                                     | 923.65 (9)                                     |
| <i>Z</i>                           | 1                                                                                                          | 1                                                                                                          | 4                                              | 3                                              |
| Radiation type                     | Cu <i>Kα</i>                                                                                               | Cu <i>Kα</i>                                                                                               | Cu <i>Kα</i>                                   | Cu <i>Kα</i>                                   |
| μ (mm <sup>-1</sup> )              | 3.17                                                                                                       | 3.24                                                                                                       | 0.69                                           | 0.69                                           |
| Crystal size (mm)                  | 0.15 × 0.08 × 0.03 × 0.07 (radius)                                                                         | 0.16 × 0.09 × 0.02 × 0.04 (radius)                                                                         | 0.15 × 0.08 × 0.02 × 0.10 (radius)             | 0.3 × 0.12 × 0.03 × 0.05 (radius)              |

**Table 7:** Data collection of **1, 2, L1-p1, L1-p2**

| Diffractionmeter                                                           | STOE STADIVARI                                                                                                                                                                                                                                                                                                                                                                                      | STOE STADIVARI                                                                                                                                                                                                                                                                                                                                                                                      | STOE STADIVARI                                                                                                                                                                                                                                                                                                                                                                                     | STOE STADIVARI                                                                                                                                                                                                                                                                                                                                                                                      |
|----------------------------------------------------------------------------|-----------------------------------------------------------------------------------------------------------------------------------------------------------------------------------------------------------------------------------------------------------------------------------------------------------------------------------------------------------------------------------------------------|-----------------------------------------------------------------------------------------------------------------------------------------------------------------------------------------------------------------------------------------------------------------------------------------------------------------------------------------------------------------------------------------------------|----------------------------------------------------------------------------------------------------------------------------------------------------------------------------------------------------------------------------------------------------------------------------------------------------------------------------------------------------------------------------------------------------|-----------------------------------------------------------------------------------------------------------------------------------------------------------------------------------------------------------------------------------------------------------------------------------------------------------------------------------------------------------------------------------------------------|
| Absorption correction                                                      | Multi-scan STOE LANA, absorption correction by scaling of reflection intensities. J. Koziskova, F. Hahn, J. Richter, J. Kozisek, "Comparison of different absorption corrections on the model structure of tetrakis( $\mu$ 2-acetato)- diaqua-dicopper(II)", Acta Chimica Slovaca, vol. 9, no. 2, 2016, pp. 136 - 140. Afterwards a spherical absorption correction was performed within STOE LANA. | Multi-scan STOE LANA, absorption correction by scaling of reflection intensities. J. Koziskova, F. Hahn, J. Richter, J. Kozisek, "Comparison of different absorption corrections on the model structure of tetrakis( $\mu$ 2-acetato)- diaqua-dicopper(II)", Acta Chimica Slovaca, vol. 9, no. 2, 2016, pp. 136 - 140. Afterwards a spherical absorption correction was performed within STOE LANA. | Multi-scan STOE LANA, absorption correction by scaling of reflection intensities. J. Koziskova, F.Hahn, J. Richter, J. Kozisek, "Comparison of different absorption corrections on the model structure of tetrakis( $\mu$ 2-acetato)- diaquadi-copper(II)", Acta Chimica Slovaca, vol. 9, no. 2, 2016, pp. 136 - 140. Afterwards a spherical absorption correction was performed within STOE LANA. | Multi-scan STOE LANA, absorption correction by scaling of reflection intensities. J. Koziskova, F. Hahn, J. Richter, J. Kozisek, "Comparison of different absorption corrections on the model structure of tetrakis( $\mu$ 2-acetato)- diaqua-dicopper(II)", Acta Chimica Slovaca, vol. 9, no. 2, 2016, pp. 136 - 140. Afterwards a spherical absorption correction was performed within STOE LANA. |
| $T_{\min}, T_{\max}$                                                       | 0.372, 0.551                                                                                                                                                                                                                                                                                                                                                                                        | 0.527, 0.712                                                                                                                                                                                                                                                                                                                                                                                        | 0.0000, 0.0000                                                                                                                                                                                                                                                                                                                                                                                     | 0.780, 0.898                                                                                                                                                                                                                                                                                                                                                                                        |
| No. of measured, independent and observed [ $I > 2\sigma(I)$ ] reflections | 31264, 5911, 5456                                                                                                                                                                                                                                                                                                                                                                                   | 21824, 6017, 5487                                                                                                                                                                                                                                                                                                                                                                                   | 8027, 8027, 5553                                                                                                                                                                                                                                                                                                                                                                                   | 9409, 1729, 1700                                                                                                                                                                                                                                                                                                                                                                                    |
| $R_{\text{int}}$                                                           | 0.046                                                                                                                                                                                                                                                                                                                                                                                               | 0.024                                                                                                                                                                                                                                                                                                                                                                                               | ?                                                                                                                                                                                                                                                                                                                                                                                                  | 0.036                                                                                                                                                                                                                                                                                                                                                                                               |
| $(\sin \theta/\lambda)_{\text{max}}$ ( $\text{\AA}^{-1}$ )                 | 0.604                                                                                                                                                                                                                                                                                                                                                                                               | 0.612                                                                                                                                                                                                                                                                                                                                                                                               | 0.602                                                                                                                                                                                                                                                                                                                                                                                              | 0.605                                                                                                                                                                                                                                                                                                                                                                                               |
| Refinement $R[F^2 > 2\sigma(F^2)]$ , $wR(F^2)$ , $S$                       | 0.061, 0.166, 1.10                                                                                                                                                                                                                                                                                                                                                                                  | 0.042, 0.112, 1.05                                                                                                                                                                                                                                                                                                                                                                                  | 0.089, 0.300, 1.08                                                                                                                                                                                                                                                                                                                                                                                 | 0.050, 0.139, 1.14                                                                                                                                                                                                                                                                                                                                                                                  |
| No. of reflections                                                         | 5911                                                                                                                                                                                                                                                                                                                                                                                                | 6017                                                                                                                                                                                                                                                                                                                                                                                                | 8027                                                                                                                                                                                                                                                                                                                                                                                               | 1729                                                                                                                                                                                                                                                                                                                                                                                                |
| No. of parameters                                                          | 468                                                                                                                                                                                                                                                                                                                                                                                                 | 468                                                                                                                                                                                                                                                                                                                                                                                                 | 362                                                                                                                                                                                                                                                                                                                                                                                                | 182                                                                                                                                                                                                                                                                                                                                                                                                 |
| No. of restraints                                                          | 0                                                                                                                                                                                                                                                                                                                                                                                                   | 0                                                                                                                                                                                                                                                                                                                                                                                                   | 0                                                                                                                                                                                                                                                                                                                                                                                                  | 1                                                                                                                                                                                                                                                                                                                                                                                                   |
| H-atom treatment                                                           | H-atom parameters constrained                                                                                                                                                                                                                                                                                                                                                                       | H-atom parameters constrained                                                                                                                                                                                                                                                                                                                                                                       | H-atom parameters constrained                                                                                                                                                                                                                                                                                                                                                                      | H-atom parameters constrained                                                                                                                                                                                                                                                                                                                                                                       |
| $\Delta\rho_{\text{max}}, \Delta\rho_{\text{min}}$ ( $\text{e \AA}^{-3}$ ) | 0.83, -0.35                                                                                                                                                                                                                                                                                                                                                                                         | 0.48, -0.50                                                                                                                                                                                                                                                                                                                                                                                         | 0.44, -0.40                                                                                                                                                                                                                                                                                                                                                                                        | 0.21, -0.23                                                                                                                                                                                                                                                                                                                                                                                         |

|                              |   |   |   |                                                                                                                             |
|------------------------------|---|---|---|-----------------------------------------------------------------------------------------------------------------------------|
| Absolute structure           | – | – | – | Flack x determined using 571 quotients [(I+)-(I-)]/[(I+)+(I-)] (Parsons, Flack and Wagner, Acta Cryst. B69 (2013) 249-259). |
| Absolute structure parameter | – | – | – | 0.3 (9)                                                                                                                     |

**Table 8:** Crystal data of **L2-ns**, **L2-s1**, **L2-s2**

|                                    |                                                |                                                                                    |                                                                     |
|------------------------------------|------------------------------------------------|------------------------------------------------------------------------------------|---------------------------------------------------------------------|
| Chemical formula                   | C <sub>32</sub> H <sub>24</sub> N <sub>8</sub> | C <sub>32</sub> H <sub>24</sub> N <sub>8</sub> +2(C <sub>2</sub> H <sub>3</sub> N) | 2(CH <sub>4</sub> O)+C <sub>32</sub> H <sub>24</sub> N <sub>8</sub> |
| <i>M<sub>r</sub></i>               | 520.59                                         | 602.70                                                                             | 584.67                                                              |
| Crystal system, space group        | Triclinic, <i>P</i> $\bar{1}$                  | Triclinic, <i>P</i> $\bar{1}$                                                      | Triclinic, <i>P</i> $\bar{1}$                                       |
| Temperature (K)                    | 100                                            | 100                                                                                | 100                                                                 |
| <i>a</i> , <i>b</i> , <i>c</i> (Å) | 8.9531 (7), 10.6297 (9), 15.4615 (11)          | 8.3531 (6), 9.3239 (6), 9.6269 (7)                                                 | 8.1947 (8), 9.5350 (9), 10.8960 (11)                                |
| $\alpha$ , $\beta$ , $\gamma$ (°)  | 94.965 (6), 104.688 (6), 114.640 (6)           | 95.204 (6), 92.686 (6), 94.521 (6)                                                 | 114.584 (7), 107.805 (7), 93.255 (8)                                |
| <i>V</i> (Å <sup>3</sup> )         | 1262.45 (18)                                   | 743.26 (9)                                                                         | 720.28 (13)                                                         |
| <i>Z</i>                           | 2                                              | 1                                                                                  | 1                                                                   |
| Radiation type                     | Cu <i>K</i> $\alpha$                           | Cu <i>K</i> $\alpha$                                                               | Cu <i>K</i> $\alpha$                                                |
| $\mu$ (mm <sup>-1</sup> )          | 0.68                                           | 0.67                                                                               | 0.70                                                                |
| Crystal size (mm)                  | 0.07 × 0.05 × 0.02                             | 0.22 × 0.16 × 0.06 × 0.04 (radius)                                                 | 0.15 × 0.08 × 0.02 × 0.05 (radius)                                  |

**Table 9:** Data collection of of **L2-ns**, **L2-s1**, **L2-s2**

|                                                                                                                                    |                                                                                                                                                                                                                                                                                                                        |                                                                                                                                                                                                                                                                                                                        |                                                                                                                                                                                                                                                                                                                                                                                                      |
|------------------------------------------------------------------------------------------------------------------------------------|------------------------------------------------------------------------------------------------------------------------------------------------------------------------------------------------------------------------------------------------------------------------------------------------------------------------|------------------------------------------------------------------------------------------------------------------------------------------------------------------------------------------------------------------------------------------------------------------------------------------------------------------------|------------------------------------------------------------------------------------------------------------------------------------------------------------------------------------------------------------------------------------------------------------------------------------------------------------------------------------------------------------------------------------------------------|
| Diffractometer                                                                                                                     | STOE STADIVARI                                                                                                                                                                                                                                                                                                         | STOE STADIVARI                                                                                                                                                                                                                                                                                                         | STOE STADIVARI                                                                                                                                                                                                                                                                                                                                                                                       |
| Absorption correction                                                                                                              | Multi-scan STOE LANA, absorption correction by scaling of reflection intensities. J. Koziskova, F. Hahn, J. Richter, J. Kozisek, "Comparison of different absorption corrections on the model structure of tetrakis( $\mu$ 2-acetato)- diaqua-dicopper(II)", Acta Chimica Slovaca, vol. 9, no. 2, 2016, pp. 136 - 140. | Multi-scan STOE LANA, absorption correction by scaling of reflection intensities. J. Koziskova, F. Hahn, J. Richter, J. Kozisek, "Comparison of different absorption corrections on the model structure of tetrakis( $\mu$ 2-acetato)-diaqua-di-copper(II)", Acta Chimica Slovaca, vol. 9, no. 2, 2016, pp. 136 - 140. | Multi-scan STOE LANA, absorption correction by scaling of reflection intensities. J. Koziskova, F. Hahn, J. Richter, J. Kozisek, "Comparison of different absorption corrections on the model structure of tetrakis( $\mu$ 2-acetato)- diaqua-di-copper(II)", Acta Chimica Slovaca, vol. 9, no. 2, 2016, pp. 136 - 140. Afterwards a spherical absorption correction was performed within STOE LANA. |
| <i>T<sub>min</sub></i> , <i>T<sub>max</sub></i>                                                                                    | 0.954, 0.987                                                                                                                                                                                                                                                                                                           | 0.863, 0.961                                                                                                                                                                                                                                                                                                           | 0.686, 0.949                                                                                                                                                                                                                                                                                                                                                                                         |
| No. of measured, independent and observed [ <i>I</i> > 2 $\sigma$ ( <i>I</i> )] reflections                                        | 25734, 25734, 19209                                                                                                                                                                                                                                                                                                    | 10260, 2721, 2495                                                                                                                                                                                                                                                                                                      | 8615, 2500, 1864                                                                                                                                                                                                                                                                                                                                                                                     |
| <i>R<sub>int</sub></i>                                                                                                             | ?                                                                                                                                                                                                                                                                                                                      | 0.022                                                                                                                                                                                                                                                                                                                  | 0.069                                                                                                                                                                                                                                                                                                                                                                                                |
| ( <i>sin</i> $\theta$ / $\lambda$ ) <sub>max</sub> (Å <sup>-1</sup> )                                                              | 0.599                                                                                                                                                                                                                                                                                                                  | 0.610                                                                                                                                                                                                                                                                                                                  | 0.600                                                                                                                                                                                                                                                                                                                                                                                                |
| Refinement <i>R</i> [ <i>F</i> <sup>2</sup> > 2 $\sigma$ ( <i>F</i> <sup>2</sup> )], <i>wR</i> ( <i>F</i> <sup>2</sup> ), <i>S</i> | 0.063, 0.180, 1.03                                                                                                                                                                                                                                                                                                     | 0.037, 0.101, 1.04                                                                                                                                                                                                                                                                                                     | 0.068, 0.187, 1.07                                                                                                                                                                                                                                                                                                                                                                                   |
| No. of reflections                                                                                                                 | 25734                                                                                                                                                                                                                                                                                                                  | 2721                                                                                                                                                                                                                                                                                                                   | 2500                                                                                                                                                                                                                                                                                                                                                                                                 |
| No. of parameters                                                                                                                  | 363                                                                                                                                                                                                                                                                                                                    | 210                                                                                                                                                                                                                                                                                                                    | 201                                                                                                                                                                                                                                                                                                                                                                                                  |
| No. of restraints                                                                                                                  | 0                                                                                                                                                                                                                                                                                                                      | 0                                                                                                                                                                                                                                                                                                                      | 0                                                                                                                                                                                                                                                                                                                                                                                                    |

| H-atom treatment                                                | H-atom parameters constrained | H-atom parameters constrained | H-atom parameters constrained |
|-----------------------------------------------------------------|-------------------------------|-------------------------------|-------------------------------|
| $\Delta\rho_{\max}, \Delta\rho_{\min}$ ( $e \text{ \AA}^{-3}$ ) | 0.41, -0.34                   | 0.22, -0.22                   | 0.27, -0.25                   |
| Absolute structure                                              | –                             | –                             | –                             |
| Absolute structure parameter                                    | –                             | –                             | –                             |

**Table 10:** Geometric parameters of compound **1** ( $\text{\AA}$ ,  $^\circ$ ), symmetry code: (i)  $-x+1, -y+1, -z+1$

|                                      |           |               |          |
|--------------------------------------|-----------|---------------|----------|
| Fe1—N4                               | 2.195(3)  | C15—H15A      | 0.9900   |
| Fe1—N4 <sup>i</sup>                  | 2.195(3)  | C15—H15B      | 0.9900   |
| Fe1—N8 <sup>i</sup>                  | 2.162(3)  | C16—H16       | 0.9500   |
| Fe1—N8                               | 2.162(3)  | C17—C18       | 1.391(5) |
| Fe1—N9 <sup>i</sup>                  | 2.141(3)  | C17—C30       | 1.428(5) |
| Fe1—N9                               | 2.141(3)  | C17—C31       | 1.522(5) |
| N1—N2                                | 1.352(4)  | C18—C19       | 1.423(5) |
| N1—C15                               | 1.474(4)  | C18—C23       | 1.451(5) |
| N1—C16                               | 1.327(4)  | C19—H19       | 0.9500   |
| N2—N3                                | 1.291(4)  | C19—C20       | 1.371(6) |
| N3—N4                                | 1.374(4)  | C20—H20       | 0.9500   |
| N4—C16                               | 1.316(4)  | C20—C21       | 1.418(5) |
| N5—N6                                | 1.347(4)  | C21—H21       | 0.9500   |
| N5—C31                               | 1.470(4)  | C21—C22       | 1.350(6) |
| N5—C32                               | 1.323(4)  | C22—H22       | 0.9500   |
| N6—N7                                | 1.288(4)  | C22—C23       | 1.419(5) |
| N7—N8                                | 1.356(4)  | C23—C24       | 1.393(5) |
| N8—C32                               | 1.310(4)  | C24—H24       | 0.9500   |
| N9—C33                               | 1.166(5)  | C24—C25       | 1.401(5) |
| C1—C2                                | 1.399(5)  | C25—C26       | 1.438(5) |
| C1—C14                               | 1.409(5)  | C25—C30       | 1.444(5) |
| C1—C15                               | 1.519(5)  | C26—H26       | 0.9500   |
| C2—C3                                | 1.431(5)  | C26—C27       | 1.323(6) |
| C2—C7                                | 1.447(5)  | C27—H27       | 0.9500   |
| C3—H3                                | 0.9500    | C27—C28       | 1.424(6) |
| C3—C4                                | 1.363(6)  | C28—H28       | 0.9500   |
| C4—H4                                | 0.9500    | C28—C29       | 1.368(5) |
| C4—C5                                | 1.413(6)  | C29—H29       | 0.9500   |
| C5—H5                                | 0.9500    | C29—C30       | 1.423(5) |
| C5—C6                                | 1.359(6)  | C31—H31A      | 0.9900   |
| C6—H6                                | 0.9500    | C31—H31B      | 0.9900   |
| C6—C7                                | 1.425(5)  | C32—H32       | 0.9500   |
| C7—C8                                | 1.392(5)  | C33—C34       | 1.438(6) |
| C8—H8                                | 0.9500    | C34—H34A      | 0.9800   |
| C8—C9                                | 1.389(5)  | C34—H34B      | 0.9800   |
| C9—C10                               | 1.433(5)  | C34—H34C      | 0.9800   |
| C9—C14                               | 1.437(5)  | C11—O1        | 1.443(3) |
| C10—H10                              | 0.9500    | C11—O2        | 1.436(3) |
| C10—C11                              | 1.354(6)  | C11—O3        | 1.434(3) |
| C11—H11                              | 0.9500    | C11—O4        | 1.429(3) |
| C11—C12                              | 1.423(6)  | N10—C35       | 1.146(6) |
| C12—H12                              | 0.9500    | C35—C36       | 1.454(6) |
| C12—C13                              | 1.360(5)  | C36—H36A      | 0.9800   |
| C13—H13                              | 0.9500    | C36—H36B      | 0.9800   |
| C13—C14                              | 1.435(5)  | C36—H36C      | 0.9800   |
| N4 <sup>i</sup> —Fe1—N4              | 180.0     | C1—C15—H15A   | 109.1    |
| N8—Fe1—N4                            | 92.96(10) | C1—C15—H15B   | 109.1    |
| N8 <sup>i</sup> —Fe1—N4 <sup>i</sup> | 92.96(10) | H15A—C15—H15B | 107.8    |
| N8 <sup>i</sup> —Fe1—N4              | 87.04(10) | N1—C16—H16    | 125.4    |
| N8—Fe1—N4 <sup>i</sup>               | 87.05(10) | N4—C16—N1     | 109.1(3) |
| N8 <sup>i</sup> —Fe1—N8              | 180.0     | N4—C16—H16    | 125.4    |
| N9 <sup>i</sup> —Fe1—N4 <sup>i</sup> | 89.42(11) | C18—C17—C30   | 121.8(3) |
| N9—Fe1—N4                            | 89.42(11) | C18—C17—C31   | 120.3(3) |
| N9—Fe1—N4 <sup>i</sup>               | 90.58(11) | C30—C17—C31   | 117.9(3) |

|                                      |           |               |            |
|--------------------------------------|-----------|---------------|------------|
| N9 <sup>i</sup> —Fe1—N4              | 90.58(11) | C17—C18—C19   | 123.5(3)   |
| N9 <sup>i</sup> —Fe1—N8              | 86.70(11) | C17—C18—C23   | 119.6(3)   |
| N9 <sup>i</sup> —Fe1—N8 <sup>i</sup> | 93.30(11) | C19—C18—C23   | 116.8(3)   |
| N9—Fe1—N8 <sup>i</sup>               | 86.70(11) | C18—C19—H19   | 119.3      |
| N9—Fe1—N8                            | 93.30(11) | C20—C19—C18   | 121.4(3)   |
| N9—Fe1—N9 <sup>i</sup>               | 180.0     | C20—C19—H19   | 119.3      |
| N2—N1—C15                            | 121.1(3)  | C19—C20—H20   | 119.5      |
| C16—N1—N2                            | 108.0(3)  | C19—C20—C21   | 121.0(4)   |
| C16—N1—C15                           | 130.9(3)  | C21—C20—H20   | 119.5      |
| N3—N2—N1                             | 107.5(3)  | C20—C21—H21   | 120.2      |
| N2—N3—N4                             | 109.4(3)  | C22—C21—C20   | 119.6(4)   |
| N3—N4—Fe1                            | 122.7(2)  | C22—C21—H21   | 120.2      |
| C16—N4—Fe1                           | 129.9(2)  | C21—C22—H22   | 119.2      |
| C16—N4—N3                            | 106.0(3)  | C21—C22—C23   | 121.5(4)   |
| N6—N5—C31                            | 122.9(3)  | C23—C22—H22   | 119.2      |
| C32—N5—N6                            | 108.3(3)  | C22—C23—C18   | 119.6(3)   |
| C32—N5—C31                           | 128.8(3)  | C24—C23—C18   | 118.9(3)   |
| N7—N6—N5                             | 106.7(3)  | C24—C23—C22   | 121.5(3)   |
| N6—N7—N8                             | 110.0(3)  | C23—C24—H24   | 119.1      |
| N7—N8—Fe1                            | 128.6(2)  | C23—C24—C25   | 121.7(3)   |
| C32—N8—Fe1                           | 125.0(2)  | C25—C24—H24   | 119.1      |
| C32—N8—N7                            | 106.3(3)  | C24—C25—C26   | 121.6(3)   |
| C33—N9—Fe1                           | 157.2(3)  | C24—C25—C30   | 120.3(3)   |
| C2—C1—C14                            | 121.1(3)  | C26—C25—C30   | 118.1(3)   |
| C2—C1—C15                            | 119.6(3)  | C25—C26—H26   | 119.3      |
| C14—C1—C15                           | 119.3(3)  | C27—C26—C25   | 121.4(4)   |
| C1—C2—C3                             | 123.9(3)  | C27—C26—H26   | 119.3      |
| C1—C2—C7                             | 119.3(3)  | C26—C27—H27   | 119.5      |
| C3—C2—C7                             | 116.8(3)  | C26—C27—C28   | 120.9(4)   |
| C2—C3—H3                             | 119.1     | C28—C27—H27   | 119.5      |
| C4—C3—C2                             | 121.9(4)  | C27—C28—H28   | 119.7      |
| C4—C3—H3                             | 119.1     | C29—C28—C27   | 120.5(4)   |
| C3—C4—H4                             | 119.6     | C29—C28—H28   | 119.7      |
| C3—C4—C5                             | 120.8(4)  | C28—C29—H29   | 119.8      |
| C5—C4—H4                             | 119.6     | C28—C29—C30   | 120.4(4)   |
| C4—C5—H5                             | 120.0     | C30—C29—H29   | 119.8      |
| C6—C5—C4                             | 119.9(4)  | C17—C30—C25   | 117.5(3)   |
| C6—C5—H5                             | 120.0     | C29—C30—C17   | 124.1(3)   |
| C5—C6—H6                             | 119.3     | C29—C30—C25   | 118.4(3)   |
| C5—C6—C7                             | 121.4(4)  | N5—C31—C17    | 109.2(3)   |
| C7—C6—H6                             | 119.3     | N5—C31—H31A   | 109.8      |
| C6—C7—C2                             | 119.3(3)  | N5—C31—H31B   | 109.8      |
| C8—C7—C2                             | 118.8(3)  | C17—C31—H31A  | 109.8      |
| C8—C7—C6                             | 121.9(3)  | C17—C31—H31B  | 109.8      |
| C7—C8—H8                             | 118.8     | H31A—C31—H31B | 108.3      |
| C9—C8—C7                             | 122.4(3)  | N5—C32—H32    | 125.7      |
| C9—C8—H8                             | 118.8     | N8—C32—N5     | 108.7(3)   |
| C8—C9—C10                            | 121.6(3)  | N8—C32—H32    | 125.7      |
| C8—C9—C14                            | 119.1(3)  | N9—C33—C34    | 178.6(4)   |
| C10—C9—C14                           | 119.2(4)  | C33—C34—H34A  | 109.5      |
| C9—C10—H10                           | 119.5     | C33—C34—H34B  | 109.5      |
| C11—C10—C9                           | 121.1(4)  | C33—C34—H34C  | 109.5      |
| C11—C10—H10                          | 119.5     | H34A—C34—H34B | 109.5      |
| C10—C11—H11                          | 119.8     | H34A—C34—H34C | 109.5      |
| C10—C11—C12                          | 120.4(4)  | H34B—C34—H34C | 109.5      |
| C12—C11—H11                          | 119.8     | O2—C11—O1     | 109.10(17) |
| C11—C12—H12                          | 119.9     | O3—C11—O1     | 110.13(18) |
| C13—C12—C11                          | 120.1(4)  | O3—C11—O2     | 109.99(18) |
| C13—C12—H12                          | 119.9     | O4—C11—O1     | 109.64(19) |
| C12—C13—H13                          | 119.0     | O4—C11—O2     | 108.4(2)   |
| C12—C13—C14                          | 122.0(4)  | O4—C11—O3     | 109.59(18) |
| C14—C13—H13                          | 119.0     | N10—C35—C36   | 179.4(5)   |
| C1—C14—C9                            | 119.3(3)  | C35—C36—H36A  | 109.5      |
| C1—C14—C13                           | 123.6(3)  | C35—C36—H36B  | 109.5      |

|                 |           |                 |           |
|-----------------|-----------|-----------------|-----------|
| C13—C14—C9      | 117.1(3)  | C35—C36—H36C    | 109.5     |
| N1—C15—C1       | 112.7(3)  | H36A—C36—H36B   | 109.5     |
| N1—C15—H15A     | 109.1     | H36A—C36—H36C   | 109.5     |
| N1—C15—H15B     | 109.1     | H36B—C36—H36C   | 109.5     |
| Fe1—N4—C16—N1   | 167.0(2)  | C15—N1—C16—N4   | -178.3(3) |
| Fe1—N8—C32—N5   | 177.4(2)  | C15—C1—C2—C3    | 0.8(5)    |
| N1—N2—N3—N4     | 0.1(4)    | C15—C1—C2—C7    | 179.0(3)  |
| N2—N1—C15—C1    | 74.6(4)   | C15—C1—C14—C9   | -177.8(3) |
| N2—N1—C16—N4    | -0.4(4)   | C15—C1—C14—C13  | 1.5(5)    |
| N2—N3—N4—Fe1    | -168.1(2) | C16—N1—N2—N3    | 0.2(4)    |
| N2—N3—N4—C16    | -0.3(4)   | C16—N1—C15—C1   | -107.7(4) |
| N3—N4—C16—N1    | 0.4(4)    | C17—C18—C19—C20 | -177.2(3) |
| N5—N6—N7—N8     | 0.6(4)    | C17—C18—C23—C22 | 179.4(3)  |
| N6—N5—C31—C17   | -170.9(3) | C17—C18—C23—C24 | 0.7(5)    |
| N6—N5—C32—N8    | 0.8(4)    | C18—C17—C30—C25 | 4.6(5)    |
| N6—N7—N8—Fe1    | -177.8(2) | C18—C17—C30—C29 | -173.8(3) |
| N6—N7—N8—C32    | -0.1(4)   | C18—C17—C31—N5  | 91.0(4)   |
| N7—N8—C32—N5    | -0.4(4)   | C18—C19—C20—C21 | -1.7(6)   |
| C1—C2—C3—C4     | 177.3(4)  | C18—C23—C24—C25 | 0.9(5)    |
| C1—C2—C7—C6     | -178.9(3) | C19—C18—C23—C22 | 2.3(5)    |
| C1—C2—C7—C8     | -1.2(5)   | C19—C18—C23—C24 | -176.3(3) |
| C2—C1—C14—C9    | 0.4(5)    | C19—C20—C21—C22 | 1.7(6)    |
| C2—C1—C14—C13   | 179.8(3)  | C20—C21—C22—C23 | 0.4(6)    |
| C2—C1—C15—N1    | 91.3(4)   | C21—C22—C23—C18 | -2.4(5)   |
| C2—C3—C4—C5     | 1.3(6)    | C21—C22—C23—C24 | 176.2(3)  |
| C2—C7—C8—C9     | 0.5(5)    | C22—C23—C24—C25 | -177.7(3) |
| C3—C2—C7—C6     | -0.5(5)   | C23—C18—C19—C20 | -0.3(5)   |
| C3—C2—C7—C8     | 177.1(3)  | C23—C24—C25—C26 | 179.4(3)  |
| C3—C4—C5—C6     | -0.2(6)   | C23—C24—C25—C30 | 0.2(5)    |
| C4—C5—C6—C7     | -1.3(6)   | C24—C25—C26—C27 | -177.7(3) |
| C5—C6—C7—C2     | 1.6(6)    | C24—C25—C30—C17 | -2.9(5)   |
| C5—C6—C7—C8     | -175.9(4) | C24—C25—C30—C29 | 175.6(3)  |
| C6—C7—C8—C9     | 178.1(3)  | C25—C26—C27—C28 | 1.6(6)    |
| C7—C2—C3—C4     | -0.9(5)   | C26—C25—C30—C17 | 177.9(3)  |
| C7—C8—C9—C10    | -178.1(3) | C26—C25—C30—C29 | -3.6(5)   |
| C7—C8—C9—C14    | 0.7(5)    | C26—C27—C28—C29 | -2.6(6)   |
| C8—C9—C10—C11   | 179.4(4)  | C27—C28—C29—C30 | 0.4(6)    |
| C8—C9—C14—C1    | -1.1(5)   | C28—C29—C30—C17 | -178.9(3) |
| C8—C9—C14—C13   | 179.5(3)  | C28—C29—C30—C25 | 2.7(5)    |
| C9—C10—C11—C12  | 0.7(6)    | C30—C17—C18—C19 | 173.2(3)  |
| C10—C9—C14—C1   | 177.6(3)  | C30—C17—C18—C23 | -3.6(5)   |
| C10—C9—C14—C13  | -1.8(5)   | C30—C17—C31—N5  | -88.3(4)  |
| C10—C11—C12—C13 | -0.8(6)   | C30—C25—C26—C27 | 1.5(5)    |
| C11—C12—C13—C14 | -0.4(6)   | C31—N5—N6—N7    | 178.0(3)  |
| C12—C13—C14—C1  | -177.7(3) | C31—N5—C32—N8   | -178.0(3) |
| C12—C13—C14—C9  | 1.7(5)    | C31—C17—C18—C19 | -6.1(5)   |
| C14—C1—C2—C3    | -177.5(3) | C31—C17—C18—C23 | 177.1(3)  |
| C14—C1—C2—C7    | 0.7(5)    | C31—C17—C30—C25 | -176.0(3) |
| C14—C1—C15—N1   | -90.5(4)  | C31—C17—C30—C29 | 5.6(5)    |
| C14—C9—C10—C11  | 0.6(6)    | C32—N5—N6—N7    | -0.8(4)   |
| C15—N1—N2—N3    | 178.3(3)  | C32—N5—C31—C17  | 7.7(5)    |

**Table 11:** Geometric parameters of compound **2** (Å, °), symmetry codes: (i) -x+1, -y+1, -z+1; (ii) -x, -y+2, -z+1

|                     |            |          |          |
|---------------------|------------|----------|----------|
| Fe1—N4              | 2.1313(18) | C11—H11  | 0.9500   |
| Fe1—N4 <sup>i</sup> | 2.1314(18) | C11—C12  | 1.392(3) |
| Fe1—N8              | 2.1653(18) | C12—H12  | 0.9500   |
| Fe1—N8 <sup>i</sup> | 2.1653(18) | C12—C13  | 1.388(3) |
| Fe1—N9              | 2.1288(19) | C13—H13  | 0.9500   |
| Fe1—N9 <sup>i</sup> | 2.1289(19) | C13—C14  | 1.393(3) |
| Cl1—O1              | 1.421(2)   | C15—H15A | 0.9900   |
| Cl1—O2              | 1.4281(18) | C15—H15B | 0.9900   |
| Cl1—O3              | 1.4325(17) | C16—H16  | 0.9500   |

|                                      |            |               |            |
|--------------------------------------|------------|---------------|------------|
| C11—O4                               | 1.435(2)   | C17—C18       | 1.411(3)   |
| N1—N2                                | 1.355(2)   | C17—C30       | 1.415(3)   |
| N1—C15                               | 1.476(3)   | C17—C31       | 1.513(3)   |
| N1—C16                               | 1.328(3)   | C18—C19       | 1.436(3)   |
| N2—N3                                | 1.292(3)   | C18—C23       | 1.435(3)   |
| N3—N4                                | 1.352(2)   | C19—H19       | 0.9500     |
| N4—C16                               | 1.318(3)   | C19—C20       | 1.365(3)   |
| N5—N6                                | 1.356(2)   | C20—H20       | 0.9500     |
| N5—C31                               | 1.475(3)   | C20—C21       | 1.413(4)   |
| N5—C32                               | 1.333(3)   | C21—H21       | 0.9500     |
| N6—N7                                | 1.292(3)   | C21—C22       | 1.354(3)   |
| N7—N8                                | 1.372(2)   | C22—H22       | 0.9500     |
| N8—C32                               | 1.310(3)   | C22—C23       | 1.428(3)   |
| N9—C33                               | 1.142(3)   | C23—C24       | 1.394(3)   |
| N10—C35                              | 1.142(3)   | C24—H24       | 0.9500     |
| C1—C2                                | 1.526(3)   | C24—C25       | 1.394(3)   |
| C1—C8 <sup>ii</sup>                  | 1.631(3)   | C25—C26       | 1.429(3)   |
| C1—C14                               | 1.534(3)   | C25—C30       | 1.435(3)   |
| C1—C15                               | 1.534(3)   | C26—H26       | 0.9500     |
| C2—C3                                | 1.393(3)   | C26—C27       | 1.353(4)   |
| C2—C7                                | 1.406(3)   | C27—H27       | 0.9500     |
| C3—H3                                | 0.9500     | C27—C28       | 1.418(3)   |
| C3—C4                                | 1.393(3)   | C28—H28       | 0.9500     |
| C4—H4                                | 0.9500     | C28—C29       | 1.360(3)   |
| C4—C5                                | 1.382(3)   | C29—H29       | 0.9500     |
| C5—H5                                | 0.9500     | C29—C30       | 1.435(3)   |
| C5—C6                                | 1.390(3)   | C31—H31A      | 0.9900     |
| C6—H6                                | 0.9500     | C31—H31B      | 0.9900     |
| C6—C7                                | 1.384(3)   | C32—H32       | 0.9500     |
| C7—C8                                | 1.510(3)   | C33—C34       | 1.455(3)   |
| C8—C1 <sup>ii</sup>                  | 1.631(3)   | C34—H34A      | 0.9800     |
| C8—H8                                | 1.0000     | C34—H34B      | 0.9800     |
| C8—C9                                | 1.516(3)   | C34—H34C      | 0.9800     |
| C9—C10                               | 1.388(3)   | C35—C36       | 1.451(4)   |
| C9—C14                               | 1.404(3)   | C36—H36A      | 0.9800     |
| C10—H10                              | 0.9500     | C36—H36B      | 0.9800     |
| C10—C11                              | 1.389(3)   | C36—H36C      | 0.9800     |
| N4—Fe1—N4 <sup>i</sup>               | 180.0      | C12—C13—H13   | 119.5      |
| N4—Fe1—N8 <sup>i</sup>               | 88.35(6)   | C12—C13—C14   | 120.91(19) |
| N4 <sup>i</sup> —Fe1—N8 <sup>i</sup> | 91.65(6)   | C14—C13—H13   | 119.5      |
| N4—Fe1—N8                            | 91.65(6)   | C9—C14—C1     | 116.59(18) |
| N4 <sup>i</sup> —Fe1—N8              | 88.35(6)   | C13—C14—C1    | 124.36(18) |
| N8—Fe1—N8 <sup>i</sup>               | 180.0      | C13—C14—C9    | 119.04(19) |
| N9 <sup>i</sup> —Fe1—N4              | 91.69(7)   | N1—C15—C1     | 114.98(16) |
| N9—Fe1—N4 <sup>i</sup>               | 91.69(7)   | N1—C15—H15A   | 108.5      |
| N9 <sup>i</sup> —Fe1—N4 <sup>i</sup> | 88.31(7)   | N1—C15—H15B   | 108.5      |
| N9—Fe1—N4                            | 88.31(7)   | C1—C15—H15A   | 108.5      |
| N9 <sup>i</sup> —Fe1—N8              | 88.05(7)   | C1—C15—H15B   | 108.5      |
| N9—Fe1—N8                            | 91.95(7)   | H15A—C15—H15B | 107.5      |
| N9—Fe1—N8 <sup>i</sup>               | 88.05(7)   | N1—C16—H16    | 125.7      |
| N9 <sup>i</sup> —Fe1—N8 <sup>i</sup> | 91.94(7)   | N4—C16—N1     | 108.52(18) |
| N9—Fe1—N9 <sup>i</sup>               | 180.00(7)  | N4—C16—H16    | 125.7      |
| O1—C11—O2                            | 109.79(14) | C18—C17—C30   | 120.60(19) |
| O1—C11—O3                            | 109.86(12) | C18—C17—C31   | 119.84(19) |
| O1—C11—O4                            | 110.11(16) | C30—C17—C31   | 119.55(19) |
| O2—C11—O3                            | 108.99(12) | C17—C18—C19   | 123.8(2)   |
| O2—C11—O4                            | 107.99(12) | C17—C18—C23   | 119.42(19) |
| O3—C11—O4                            | 110.07(11) | C23—C18—C19   | 116.8(2)   |
| N2—N1—C15                            | 118.72(16) | C18—C19—H19   | 119.3      |
| C16—N1—N2                            | 107.99(17) | C20—C19—C18   | 121.3(2)   |
| C16—N1—C15                           | 133.29(17) | C20—C19—H19   | 119.3      |
| N3—N2—N1                             | 106.94(16) | C19—C20—H20   | 119.4      |
| N2—N3—N4                             | 109.95(16) | C19—C20—C21   | 121.2(2)   |
| N3—N4—Fe1                            | 124.53(13) | C21—C20—H20   | 119.4      |

|                         |             |                |             |
|-------------------------|-------------|----------------|-------------|
| C16—N4—Fe1              | 128.87(14)  | C20—C21—H21    | 120.1       |
| C16—N4—N3               | 106.60(17)  | C22—C21—C20    | 119.8(2)    |
| N6—N5—C31               | 120.95(17)  | C22—C21—H21    | 120.1       |
| C32—N5—N6               | 108.10(17)  | C21—C22—H22    | 119.4       |
| C32—N5—C31              | 130.94(18)  | C21—C22—C23    | 121.2(2)    |
| N7—N6—N5                | 107.05(17)  | C23—C22—H22    | 119.4       |
| N6—N7—N8                | 109.58(17)  | C22—C23—C18    | 119.8(2)    |
| N7—N8—Fe1               | 122.17(13)  | C24—C23—C18    | 119.3(2)    |
| C32—N8—Fe1              | 130.60(15)  | C24—C23—C22    | 120.9(2)    |
| C32—N8—N7               | 106.48(17)  | C23—C24—H24    | 119.0       |
| C33—N9—Fe1              | 165.94(18)  | C25—C24—C23    | 122.0(2)    |
| C2—C1—C8 <sup>ii</sup>  | 109.73(16)  | C25—C24—H24    | 119.0       |
| C2—C1—C14               | 108.49(16)  | C24—C25—C26    | 121.2(2)    |
| C2—C1—C15               | 112.85(16)  | C24—C25—C30    | 119.3(2)    |
| C14—C1—C8 <sup>ii</sup> | 109.56(15)  | C26—C25—C30    | 119.4(2)    |
| C15—C1—C8 <sup>ii</sup> | 103.40(15)  | C25—C26—H26    | 119.5       |
| C15—C1—C14              | 112.68(17)  | C27—C26—C25    | 121.1(2)    |
| C3—C2—C1                | 124.22(18)  | C27—C26—H26    | 119.5       |
| C3—C2—C7                | 119.21(19)  | C26—C27—H27    | 119.9       |
| C7—C2—C1                | 116.48(17)  | C26—C27—C28    | 120.3(2)    |
| C2—C3—H3                | 119.8       | C28—C27—H27    | 119.9       |
| C2—C3—C4                | 120.34(19)  | C27—C28—H28    | 119.8       |
| C4—C3—H3                | 119.8       | C29—C28—C27    | 120.4(2)    |
| C3—C4—H4                | 120.0       | C29—C28—H28    | 119.8       |
| C5—C4—C3                | 119.95(19)  | C28—C29—H29    | 119.1       |
| C5—C4—H4                | 120.0       | C28—C29—C30    | 121.9(2)    |
| C4—C5—H5                | 119.9       | C30—C29—H29    | 119.1       |
| C4—C5—C6                | 120.2(2)    | C17—C30—C25    | 119.3(2)    |
| C6—C5—H5                | 119.9       | C17—C30—C29    | 123.8(2)    |
| C5—C6—H6                | 119.9       | C25—C30—C29    | 116.9(2)    |
| C7—C6—C5                | 120.27(19)  | N5—C31—C17     | 112.01(17)  |
| C7—C6—H6                | 119.9       | N5—C31—H31A    | 109.2       |
| C2—C7—C8                | 118.18(18)  | N5—C31—H31B    | 109.2       |
| C6—C7—C2                | 119.99(19)  | C17—C31—H31A   | 109.2       |
| C6—C7—C8                | 121.82(18)  | C17—C31—H31B   | 109.2       |
| C1 <sup>ii</sup> —C8—H8 | 107.6       | H31A—C31—H31B  | 107.9       |
| C7—C8—C1 <sup>ii</sup>  | 112.39(16)  | N5—C32—H32     | 125.6       |
| C7—C8—H8                | 107.6       | N8—C32—N5      | 108.79(19)  |
| C7—C8—C9                | 108.86(16)  | N8—C32—H32     | 125.6       |
| C9—C8—C1 <sup>ii</sup>  | 112.64(16)  | N9—C33—C34     | 178.0(2)    |
| C9—C8—H8                | 107.6       | C33—C34—H34A   | 109.5       |
| C10—C9—C8               | 122.24(18)  | C33—C34—H34B   | 109.5       |
| C10—C9—C14              | 119.87(19)  | C33—C34—H34C   | 109.5       |
| C14—C9—C8               | 117.88(18)  | H34A—C34—H34B  | 109.5       |
| C9—C10—H10              | 119.7       | H34A—C34—H34C  | 109.5       |
| C9—C10—C11              | 120.60(19)  | H34B—C34—H34C  | 109.5       |
| C11—C10—H10             | 119.7       | N10—C35—C36    | 179.1(3)    |
| C10—C11—H11             | 120.1       | C35—C36—H36A   | 109.5       |
| C10—C11—C12             | 119.8(2)    | C35—C36—H36B   | 109.5       |
| C12—C11—H11             | 120.1       | C35—C36—H36C   | 109.5       |
| C11—C12—H12             | 120.1       | H36A—C36—H36B  | 109.5       |
| C13—C12—C11             | 119.7(2)    | H36A—C36—H36C  | 109.5       |
| C13—C12—H12             | 120.1       | H36B—C36—H36C  | 109.5       |
| Fe1—N4—C16—N1           | 179.01(13)  | C14—C1—C2—C7   | -45.1(2)    |
| Fe1—N8—C32—N5           | -170.35(14) | C14—C1—C15—N1  | -65.7(2)    |
| N1—N2—N3—N4             | -0.2(2)     | C14—C9—C10—C11 | 0.0(3)      |
| N2—N1—C15—C1            | -168.63(17) | C15—N1—N2—N3   | 179.75(17)  |
| N2—N1—C16—N4            | -0.1(2)     | C15—N1—C16—N4  | -179.6(2)   |
| N2—N3—N4—Fe1            | -178.94(13) | C15—C1—C2—C3   | 12.7(3)     |
| N2—N3—N4—C16            | 0.1(2)      | C15—C1—C2—C7   | -170.74(17) |
| N3—N4—C16—N1            | 0.0(2)      | C15—C1—C14—C9  | 170.40(17)  |
| N5—N6—N7—N8             | 0.1(2)      | C15—C1—C14—C13 | -10.8(3)    |
| N6—N5—C31—C17           | -76.3(2)    | C16—N1—N2—N3   | 0.2(2)      |
| N6—N5—C32—N8            | 0.4(2)      | C16—N1—C15—C1  | 10.8(3)     |

|                              |             |                 |             |
|------------------------------|-------------|-----------------|-------------|
| N6—N7—N8—Fe1                 | 171.18(14)  | C17—C18—C19—C20 | -177.2(2)   |
| N6—N7—N8—C32                 | 0.1(2)      | C17—C18—C23—C22 | 177.56(19)  |
| N7—N8—C32—N5                 | -0.3(2)     | C17—C18—C23—C24 | 0.7(3)      |
| C1—C2—C3—C4                  | 178.02(19)  | C18—C17—C30—C25 | 1.3(3)      |
| C1—C2—C7—C6                  | -177.10(18) | C18—C17—C30—C29 | -176.6(2)   |
| C1—C2—C7—C8                  | 1.4(3)      | C18—C17—C31—N5  | -94.0(2)    |
| C1 <sup>ii</sup> —C8—C9—C10  | -97.6(2)    | C18—C19—C20—C21 | -0.2(4)     |
| C1 <sup>ii</sup> —C8—C9—C14  | 82.0(2)     | C18—C23—C24—C25 | 2.2(3)      |
| C2—C1—C14—C9                 | 44.7(2)     | C19—C18—C23—C22 | -0.5(3)     |
| C2—C1—C14—C13                | -136.5(2)   | C19—C18—C23—C24 | -177.39(19) |
| C2—C1—C15—N1                 | 57.6(2)     | C19—C20—C21—C22 | -0.7(4)     |
| C2—C3—C4—C5                  | -1.7(3)     | C20—C21—C22—C23 | 0.9(4)      |
| C2—C7—C8—C1 <sup>ii</sup>    | -82.5(2)    | C21—C22—C23—C18 | -0.3(3)     |
| C2—C7—C8—C9                  | 43.0(2)     | C21—C22—C23—C24 | 176.5(2)    |
| C3—C2—C7—C6                  | -0.4(3)     | C22—C23—C24—C25 | -174.6(2)   |
| C3—C2—C7—C8                  | 178.09(18)  | C23—C18—C19—C20 | 0.8(3)      |
| C3—C4—C5—C6                  | 0.6(3)      | C23—C24—C25—C26 | 174.7(2)    |
| C4—C5—C6—C7                  | 0.6(3)      | C23—C24—C25—C30 | -3.4(3)     |
| C5—C6—C7—C2                  | -0.7(3)     | C24—C25—C26—C27 | -178.3(2)   |
| C5—C6—C7—C8                  | -179.13(18) | C24—C25—C30—C17 | 1.6(3)      |
| C6—C7—C8—C1 <sup>ii</sup>    | 95.9(2)     | C24—C25—C30—C29 | 179.64(19)  |
| C6—C7—C8—C9                  | -138.61(19) | C25—C26—C27—C28 | -0.8(4)     |
| C7—C2—C3—C4                  | 1.6(3)      | C26—C25—C30—C17 | -176.5(2)   |
| C7—C8—C9—C10                 | 137.02(19)  | C26—C25—C30—C29 | 1.6(3)      |
| C7—C8—C9—C14                 | -43.3(2)    | C26—C27—C28—C29 | 0.6(4)      |
| C8 <sup>ii</sup> —C1—C2—C3   | -102.0(2)   | C27—C28—C29—C30 | 0.8(4)      |
| C8 <sup>ii</sup> —C1—C2—C7   | 74.5(2)     | C28—C29—C30—C17 | 176.1(2)    |
| C8 <sup>ii</sup> —C1—C14—C9  | -75.1(2)    | C28—C29—C30—C25 | -1.8(3)     |
| C8 <sup>ii</sup> —C1—C14—C13 | 103.7(2)    | C30—C17—C18—C19 | 175.5(2)    |
| C8 <sup>ii</sup> —C1—C15—N1  | 176.12(16)  | C30—C17—C18—C23 | -2.4(3)     |
| C8—C9—C10—C11                | 179.63(18)  | C30—C17—C31—N5  | 87.3(2)     |
| C8—C9—C14—C1                 | -0.5(3)     | C30—C25—C26—C27 | -0.3(3)     |
| C8—C9—C14—C13                | -179.35(18) | C31—N5—N6—N7    | -179.21(18) |
| C9—C10—C11—C12               | 0.2(3)      | C31—N5—C32—N8   | 179.15(19)  |
| C10—C9—C14—C1                | 179.18(18)  | C31—C17—C18—C19 | -3.1(3)     |
| C10—C9—C14—C13               | 0.3(3)      | C31—C17—C18—C23 | 178.90(18)  |
| C10—C11—C12—C13              | -0.6(3)     | C31—C17—C30—C25 | 179.96(18)  |
| C11—C12—C13—C14              | 0.9(3)      | C31—C17—C30—C29 | 2.0(3)      |
| C12—C13—C14—C1               | -179.49(19) | C32—N5—N6—N7    | -0.3(2)     |
| C12—C13—C14—C9               | -0.7(3)     | C32—N5—C31—C17  | 105.1(2)    |
| C14—C1—C2—C3                 | 138.3(2)    |                 |             |

**Table 12:** Geometric parameters of L1-p1 (Å, °)

|        |           |         |          |
|--------|-----------|---------|----------|
| N1—N2  | 1.342(6)  | N5—N6   | 1.358(6) |
| N1—C15 | 1.469(7)  | N5—C31  | 1.461(7) |
| N1—C16 | 1.337(7)  | N5—C32  | 1.342(8) |
| N2—N3  | 1.295(7)  | N6—N7   | 1.295(7) |
| N3—N4  | 1.354(6)  | N7—N8   | 1.346(7) |
| N4—C16 | 1.324(7)  | N8—C32  | 1.314(8) |
| C1—C2  | 1.419(8)  | C17—C18 | 1.419(8) |
| C1—C14 | 1.401(8)  | C17—C30 | 1.415(8) |
| C1—C15 | 1.500(9)  | C17—C31 | 1.515(8) |
| C2—C3  | 1.424(8)  | C18—C19 | 1.439(8) |
| C2—C7  | 1.427(8)  | C18—C23 | 1.428(8) |
| C3—H3  | 0.9300    | C19—H19 | 0.9300   |
| C3—C4  | 1.360(8)  | C19—C20 | 1.358(9) |
| C4—H4  | 0.9300    | C20—H20 | 0.9300   |
| C4—C5  | 1.408(10) | C20—C21 | 1.389(9) |
| C5—H5  | 0.9300    | C21—H21 | 0.9300   |
| C5—C6  | 1.350(10) | C21—C22 | 1.360(9) |
| C6—H6  | 0.9300    | C22—H22 | 0.9300   |
| C6—C7  | 1.433(9)  | C22—C23 | 1.430(8) |

|             |           |             |           |
|-------------|-----------|-------------|-----------|
| C7—C8       | 1.392(9)  | C23—C24     | 1.399(8)  |
| C8—H8       | 0.9300    | C24—H24     | 0.9300    |
| C8—C9       | 1.386(9)  | C24—C25     | 1.368(9)  |
| C9—C10      | 1.429(9)  | C25—C26     | 1.433(8)  |
| C9—C14      | 1.433(9)  | C25—C30     | 1.431(9)  |
| C10—H10     | 0.9300    | C26—H26     | 0.9300    |
| C10—C11     | 1.369(10) | C26—C27     | 1.345(9)  |
| C11—H11     | 0.9300    | C27—H27     | 0.9300    |
| C11—C12     | 1.398(11) | C27—C28     | 1.421(10) |
| C12—H12     | 0.9300    | C28—H28     | 0.9300    |
| C12—C13     | 1.353(8)  | C28—C29     | 1.354(9)  |
| C13—H13     | 0.9300    | C29—H29     | 0.9300    |
| C13—C14     | 1.431(9)  | C29—C30     | 1.434(8)  |
| C15—H15A    | 0.9700    | C31—H31A    | 0.9700    |
| C15—H15B    | 0.9700    | C31—H31B    | 0.9700    |
| C16—H16     | 0.9300    | C32—H32     | 0.9300    |
| N2—N1—C15   | 120.5(4)  | N6—N5—C31   | 121.6(5)  |
| C16—N1—N2   | 108.5(4)  | C32—N5—N6   | 107.3(5)  |
| C16—N1—C15  | 131.0(4)  | C32—N5—C31  | 131.1(5)  |
| N3—N2—N1    | 106.3(4)  | N7—N6—N5    | 106.4(4)  |
| N2—N3—N4    | 111.2(4)  | N6—N7—N8    | 111.2(5)  |
| C16—N4—N3   | 105.3(5)  | C32—N8—N7   | 105.8(5)  |
| C2—C1—C15   | 120.1(5)  | C18—C17—C31 | 119.5(5)  |
| C14—C1—C2   | 120.3(6)  | C30—C17—C18 | 120.2(5)  |
| C14—C1—C15  | 119.6(5)  | C30—C17—C31 | 120.3(5)  |
| C1—C2—C3    | 123.6(5)  | C17—C18—C19 | 122.8(5)  |
| C1—C2—C7    | 119.2(5)  | C17—C18—C23 | 119.5(5)  |
| C3—C2—C7    | 117.2(5)  | C23—C18—C19 | 117.7(5)  |
| C2—C3—H3    | 119.1     | C18—C19—H19 | 119.8     |
| C4—C3—C2    | 121.9(6)  | C20—C19—C18 | 120.3(6)  |
| C4—C3—H3    | 119.1     | C20—C19—H19 | 119.8     |
| C3—C4—H4    | 119.8     | C19—C20—H20 | 119.0     |
| C3—C4—C5    | 120.4(6)  | C19—C20—C21 | 121.9(6)  |
| C5—C4—H4    | 119.8     | C21—C20—H20 | 119.0     |
| C4—C5—H5    | 119.8     | C20—C21—H21 | 119.8     |
| C6—C5—C4    | 120.4(6)  | C22—C21—C20 | 120.3(6)  |
| C6—C5—H5    | 119.8     | C22—C21—H21 | 119.8     |
| C5—C6—H6    | 119.6     | C21—C22—H22 | 119.7     |
| C5—C6—C7    | 120.9(6)  | C21—C22—C23 | 120.6(6)  |
| C7—C6—H6    | 119.6     | C23—C22—H22 | 119.7     |
| C2—C7—C6    | 119.2(6)  | C18—C23—C22 | 119.1(5)  |
| C8—C7—C2    | 119.3(6)  | C24—C23—C18 | 118.8(5)  |
| C8—C7—C6    | 121.5(6)  | C24—C23—C22 | 122.1(6)  |
| C7—C8—H8    | 118.8     | C23—C24—H24 | 118.7     |
| C9—C8—C7    | 122.4(6)  | C25—C24—C23 | 122.6(6)  |
| C9—C8—H8    | 118.8     | C25—C24—H24 | 118.7     |
| C8—C9—C10   | 121.8(6)  | C24—C25—C26 | 121.8(6)  |
| C8—C9—C14   | 118.8(6)  | C24—C25—C30 | 119.8(5)  |
| C10—C9—C14  | 119.4(6)  | C30—C25—C26 | 118.4(5)  |
| C9—C10—H10  | 119.6     | C25—C26—H26 | 119.1     |
| C11—C10—C9  | 120.7(6)  | C27—C26—C25 | 121.9(6)  |
| C11—C10—H10 | 119.6     | C27—C26—H26 | 119.1     |
| C10—C11—H11 | 120.0     | C26—C27—H27 | 120.2     |
| C10—C11—C12 | 120.1(6)  | C26—C27—C28 | 119.6(6)  |
| C12—C11—H11 | 120.0     | C28—C27—H27 | 120.2     |
| C11—C12—H12 | 119.6     | C27—C28—H28 | 119.5     |
| C13—C12—C11 | 120.9(7)  | C29—C28—C27 | 121.1(6)  |
| C13—C12—H12 | 119.6     | C29—C28—H28 | 119.5     |
| C12—C13—H13 | 118.9     | C28—C29—H29 | 119.5     |
| C12—C13—C14 | 122.2(6)  | C28—C29—C30 | 121.1(6)  |
| C14—C13—H13 | 118.9     | C30—C29—H29 | 119.5     |
| C1—C14—C9   | 120.0(6)  | C17—C30—C25 | 119.1(5)  |
| C1—C14—C13  | 123.3(6)  | C17—C30—C29 | 123.0(5)  |
| C13—C14—C9  | 116.7(5)  | C25—C30—C29 | 117.9(5)  |

|                 |           |                 |           |
|-----------------|-----------|-----------------|-----------|
| N1—C15—C1       | 112.3(5)  | N5—C31—C17      | 112.7(5)  |
| N1—C15—H15A     | 109.1     | N5—C31—H31A     | 109.1     |
| N1—C15—H15B     | 109.1     | N5—C31—H31B     | 109.1     |
| C1—C15—H15A     | 109.1     | C17—C31—H31A    | 109.1     |
| C1—C15—H15B     | 109.1     | C17—C31—H31B    | 109.1     |
| H15A—C15—H15B   | 107.9     | H31A—C31—H31B   | 107.8     |
| N1—C16—H16      | 125.7     | N5—C32—H32      | 125.4     |
| N4—C16—N1       | 108.7(5)  | N8—C32—N5       | 109.3(5)  |
| N4—C16—H16      | 125.7     | N8—C32—H32      | 125.4     |
| N1—N2—N3—N4     | 0.1(6)    | N5—N6—N7—N8     | -0.5(6)   |
| N2—N1—C15—C1    | 60.3(6)   | N6—N5—C31—C17   | -70.0(6)  |
| N2—N1—C16—N4    | -0.1(7)   | N6—N5—C32—N8    | 0.0(7)    |
| N2—N3—N4—C16    | -0.1(7)   | N6—N7—N8—C32    | 0.5(7)    |
| N3—N4—C16—N1    | 0.1(6)    | N7—N8—C32—N5    | -0.3(7)   |
| C1—C2—C3—C4     | 179.8(5)  | C17—C18—C19—C20 | -177.8(5) |
| C1—C2—C7—C6     | 179.6(5)  | C17—C18—C23—C22 | 177.7(5)  |
| C1—C2—C7—C8     | -1.2(8)   | C17—C18—C23—C24 | -2.5(8)   |
| C2—C1—C14—C9    | -0.8(8)   | C18—C17—C30—C25 | 2.8(8)    |
| C2—C1—C14—C13   | 179.7(5)  | C18—C17—C30—C29 | -178.3(5) |
| C2—C1—C15—N1    | -95.8(6)  | C18—C17—C31—N5  | 91.3(6)   |
| C2—C3—C4—C5     | 0.6(9)    | C18—C19—C20—C21 | 0.2(9)    |
| C2—C7—C8—C9     | -0.6(8)   | C18—C23—C24—C25 | 2.7(8)    |
| C3—C2—C7—C6     | -1.1(7)   | C19—C18—C23—C22 | -0.5(8)   |
| C3—C2—C7—C8     | 178.2(5)  | C19—C18—C23—C24 | 179.4(5)  |
| C3—C4—C5—C6     | -1.3(9)   | C19—C20—C21—C22 | -0.5(9)   |
| C4—C5—C6—C7     | 0.7(9)    | C20—C21—C22—C23 | 0.2(9)    |
| C5—C6—C7—C2     | 0.5(8)    | C21—C22—C23—C18 | 0.3(8)    |
| C5—C6—C7—C8     | -178.7(6) | C21—C22—C23—C24 | -179.6(5) |
| C6—C7—C8—C9     | 178.6(5)  | C22—C23—C24—C25 | -177.5(5) |
| C7—C2—C3—C4     | 0.5(8)    | C23—C18—C19—C20 | 0.3(8)    |
| C7—C8—C9—C10    | 179.9(5)  | C23—C24—C25—C26 | -179.6(5) |
| C7—C8—C9—C14    | 1.6(8)    | C23—C24—C25—C30 | -0.1(9)   |
| C8—C9—C10—C11   | -177.8(6) | C24—C25—C26—C27 | -179.4(6) |
| C8—C9—C14—C1    | -0.9(8)   | C24—C25—C30—C17 | -2.7(8)   |
| C8—C9—C14—C13   | 178.6(5)  | C24—C25—C30—C29 | 178.4(5)  |
| C9—C10—C11—C12  | -0.6(9)   | C25—C26—C27—C28 | 0.8(9)    |
| C10—C9—C14—C1   | -179.2(5) | C26—C25—C30—C17 | 176.9(5)  |
| C10—C9—C14—C13  | 0.3(8)    | C26—C25—C30—C29 | -2.1(8)   |
| C10—C11—C12—C13 | 0.0(9)    | C26—C27—C28—C29 | -1.8(9)   |
| C11—C12—C13—C14 | 0.8(9)    | C27—C28—C29—C30 | 0.8(9)    |
| C12—C13—C14—C1  | 178.5(5)  | C28—C29—C30—C17 | -177.7(6) |
| C12—C13—C14—C9  | -0.9(8)   | C28—C29—C30—C25 | 1.2(9)    |
| C14—C1—C2—C3    | -177.4(5) | C30—C17—C18—C19 | 177.9(5)  |
| C14—C1—C2—C7    | 1.9(8)    | C30—C17—C18—C23 | -0.2(8)   |
| C14—C1—C15—N1   | 84.0(6)   | C30—C17—C31—N5  | -90.6(6)  |
| C14—C9—C10—C11  | 0.5(8)    | C30—C25—C26—C27 | 1.1(8)    |
| C15—N1—N2—N3    | -179.6(5) | C31—N5—N6—N7    | 178.8(5)  |
| C15—N1—C16—N4   | 179.5(5)  | C31—N5—C32—N8   | -178.3(6) |
| C15—C1—C2—C3    | 2.4(8)    | C31—C17—C18—C19 | -4.1(8)   |
| C15—C1—C2—C7    | -178.3(5) | C31—C17—C18—C23 | 177.9(5)  |
| C15—C1—C14—C9   | 179.4(5)  | C31—C17—C30—C25 | -175.3(5) |
| C15—C1—C14—C13  | -0.1(8)   | C31—C17—C30—C29 | 3.6(8)    |
| C16—N1—N2—N3    | 0.0(6)    | C32—N5—N6—N7    | 0.3(6)    |
| C16—N1—C15—C1   | -119.2(6) | C32—N5—C31—C17  | 108.0(7)  |

**Table 13:** Geometric parameters of L1-p2 (Å, °)

|        |          |        |          |
|--------|----------|--------|----------|
| N1—N2  | 1.346(6) | C6—C7  | 1.418(7) |
| N1—C15 | 1.461(6) | C7—C8  | 1.399(7) |
| N1—C16 | 1.337(6) | C8—H8  | 0.9500   |
| N2—N3  | 1.299(6) | C8—C9  | 1.385(7) |
| N3—N4  | 1.373(6) | C9—C10 | 1.424(7) |
| N4—C16 | 1.316(7) | C9—C14 | 1.428(7) |

|               |           |                 |           |
|---------------|-----------|-----------------|-----------|
| C1—C2         | 1.423(7)  | C10—H10         | 0.9500    |
| C1—C14        | 1.399(7)  | C10—C11         | 1.344(9)  |
| C1—C15        | 1.510(7)  | C11—H11         | 0.9500    |
| C2—C3         | 1.427(7)  | C11—C12         | 1.407(9)  |
| C2—C7         | 1.437(7)  | C12—H12         | 0.9500    |
| C3—H3         | 0.9500    | C12—C13         | 1.347(8)  |
| C3—C4         | 1.370(7)  | C13—H13         | 0.9500    |
| C4—H4         | 0.9500    | C13—C14         | 1.446(7)  |
| C4—C5         | 1.411(8)  | C15—H15A        | 0.9900    |
| C5—H5         | 0.9500    | C15—H15B        | 0.9900    |
| C5—C6         | 1.356(8)  | C16—H16         | 0.9500    |
| C6—H6         | 0.9500    |                 |           |
| N2—N1—C15     | 122.7(4)  | C9—C8—H8        | 118.8     |
| C16—N1—N2     | 107.7(4)  | C8—C9—C10       | 121.7(5)  |
| C16—N1—C15    | 129.6(4)  | C8—C9—C14       | 119.1(5)  |
| N3—N2—N1      | 106.8(4)  | C10—C9—C14      | 119.1(5)  |
| N2—N3—N4      | 110.8(4)  | C9—C10—H10      | 118.9     |
| C16—N4—N3     | 104.6(4)  | C11—C10—C9      | 122.3(6)  |
| C2—C1—C15     | 119.7(4)  | C11—C10—H10     | 118.9     |
| C14—C1—C2     | 120.8(5)  | C10—C11—H11     | 120.6     |
| C14—C1—C15    | 119.5(4)  | C10—C11—C12     | 118.7(5)  |
| C1—C2—C3      | 124.0(5)  | C12—C11—H11     | 120.6     |
| C1—C2—C7      | 118.7(4)  | C11—C12—H12     | 118.8     |
| C3—C2—C7      | 117.3(4)  | C13—C12—C11     | 122.3(5)  |
| C2—C3—H3      | 119.5     | C13—C12—H12     | 118.8     |
| C4—C3—C2      | 121.0(5)  | C12—C13—H13     | 119.7     |
| C4—C3—H3      | 119.5     | C12—C13—C14     | 120.7(5)  |
| C3—C4—H4      | 119.5     | C14—C13—H13     | 119.7     |
| C3—C4—C5      | 120.9(5)  | C1—C14—C9       | 119.9(4)  |
| C5—C4—H4      | 119.5     | C1—C14—C13      | 123.3(5)  |
| C4—C5—H5      | 120.0     | C9—C14—C13      | 116.8(5)  |
| C6—C5—C4      | 120.1(5)  | N1—C15—C1       | 112.9(4)  |
| C6—C5—H5      | 120.0     | N1—C15—H15A     | 109.0     |
| C5—C6—H6      | 119.5     | N1—C15—H15B     | 109.0     |
| C5—C6—C7      | 121.0(5)  | C1—C15—H15A     | 109.0     |
| C7—C6—H6      | 119.5     | C1—C15—H15B     | 109.0     |
| C6—C7—C2      | 119.7(5)  | H15A—C15—H15B   | 107.8     |
| C8—C7—C2      | 119.1(4)  | N1—C16—H16      | 124.9     |
| C8—C7—C6      | 121.3(5)  | N4—C16—N1       | 110.1(4)  |
| C7—C8—H8      | 118.8     | N4—C16—H16      | 124.9     |
| C9—C8—C7      | 122.4(5)  |                 |           |
| N1—N2—N3—N4   | -0.1(5)   | C8—C9—C10—C11   | -178.6(6) |
| N2—N1—C15—C1  | 60.9(6)   | C8—C9—C14—C1    | -1.5(7)   |
| N2—N1—C16—N4  | 1.2(6)    | C8—C9—C14—C13   | 178.6(5)  |
| N2—N3—N4—C16  | 0.8(6)    | C9—C10—C11—C12  | 0.8(9)    |
| N3—N4—C16—N1  | -1.3(6)   | C10—C9—C14—C1   | -179.8(5) |
| C1—C2—C3—C4   | -177.1(5) | C10—C9—C14—C13  | 0.3(7)    |
| C1—C2—C7—C6   | 177.4(5)  | C10—C11—C12—C13 | -1.4(9)   |
| C1—C2—C7—C8   | -1.6(7)   | C11—C12—C13—C14 | 1.4(9)    |
| C2—C1—C14—C9  | 2.0(8)    | C12—C13—C14—C1  | 179.3(5)  |
| C2—C1—C14—C13 | -178.1(5) | C12—C13—C14—C9  | -0.9(8)   |
| C2—C1—C15—N1  | -99.8(5)  | C14—C1—C2—C3    | 179.0(5)  |
| C2—C3—C4—C5   | -1.2(8)   | C14—C1—C2—C7    | -0.5(7)   |
| C2—C7—C8—C9   | 2.1(8)    | C14—C1—C15—N1   | 82.9(6)   |
| C3—C2—C7—C6   | -2.2(7)   | C14—C9—C10—C11  | -0.3(8)   |
| C3—C2—C7—C8   | 178.9(5)  | C15—N1—N2—N3    | -178.4(4) |
| C3—C4—C5—C6   | -0.5(9)   | C15—N1—C16—N4   | 178.8(5)  |
| C4—C5—C6—C7   | 0.7(9)    | C15—C1—C2—C3    | 1.8(8)    |
| C5—C6—C7—C2   | 0.6(8)    | C15—C1—C2—C7    | -177.8(4) |
| C5—C6—C7—C8   | 179.5(5)  | C15—C1—C14—C9   | 179.3(4)  |
| C6—C7—C8—C9   | -176.8(5) | C15—C1—C14—C13  | -0.8(8)   |
| C7—C2—C3—C4   | 2.5(8)    | C16—N1—N2—N3    | -0.7(5)   |
| C7—C8—C9—C10  | 177.7(5)  | C16—N1—C15—C1   | -116.3(6) |
| C7—C8—C9—C14  | -0.6(8)   |                 |           |

**Table 14:** Geometric parameters of **L2-ns** (Å, °), symmetry codes: (i)  $-x+1, -y+2, -z+1$ ; (ii)  $-x+1, -y+1, -z$ 

|                        |          |                           |          |
|------------------------|----------|---------------------------|----------|
| N1—N2                  | 1.343(4) | C12—C13                   | 1.382(5) |
| N1—C15                 | 1.476(4) | C13—H13                   | 0.9500   |
| N1—C16                 | 1.323(5) | C13—C14                   | 1.387(5) |
| N2—N3                  | 1.297(4) | C15—H15A                  | 0.9900   |
| N3—N4                  | 1.353(4) | C15—H15B                  | 0.9900   |
| N4—C16                 | 1.314(5) | C16—H16                   | 0.9500   |
| N5—N6                  | 1.351(4) | C17—C18                   | 1.535(5) |
| N5—C31                 | 1.480(4) | C17—C24 <sup>ii</sup>     | 1.646(5) |
| N5—C32                 | 1.333(5) | C17—C30                   | 1.528(5) |
| N6—N7                  | 1.299(4) | C17—C31                   | 1.535(5) |
| N7—N8                  | 1.367(4) | C18—C19                   | 1.392(5) |
| N8—C32                 | 1.313(5) | C18—C23                   | 1.405(5) |
| C1—C2                  | 1.540(5) | C19—H19                   | 0.9500   |
| C1—C8 <sup>i</sup>     | 1.629(5) | C19—C20                   | 1.386(5) |
| C1—C14                 | 1.538(5) | C20—H20                   | 0.9500   |
| C1—C15                 | 1.516(5) | C20—C21                   | 1.382(5) |
| C2—C3                  | 1.387(5) | C21—H21                   | 0.9500   |
| C2—C7                  | 1.401(5) | C21—C22                   | 1.387(5) |
| C3—H3                  | 0.9500   | C22—H22                   | 0.9500   |
| C3—C4                  | 1.381(5) | C22—C23                   | 1.383(5) |
| C4—H4                  | 0.9500   | C23—C24                   | 1.514(5) |
| C4—C5                  | 1.389(6) | C24—H24                   | 1.0000   |
| C5—H5                  | 0.9500   | C24—C25                   | 1.498(5) |
| C5—C6                  | 1.384(5) | C25—C26                   | 1.391(5) |
| C6—H6                  | 0.9500   | C25—C30                   | 1.400(5) |
| C6—C7                  | 1.394(5) | C26—H26                   | 0.9500   |
| C7—C8                  | 1.497(5) | C26—C27                   | 1.381(5) |
| C8—H8                  | 1.0000   | C27—H27                   | 0.9500   |
| C8—C9                  | 1.506(5) | C27—C28                   | 1.379(6) |
| C9—C10                 | 1.397(5) | C28—H28                   | 0.9500   |
| C9—C14                 | 1.400(5) | C28—C29                   | 1.391(5) |
| C10—H10                | 0.9500   | C29—H29                   | 0.9500   |
| C10—C11                | 1.380(5) | C29—C30                   | 1.389(5) |
| C11—H11                | 0.9500   | C31—H31A                  | 0.9900   |
| C11—C12                | 1.389(6) | C31—H31B                  | 0.9900   |
| C12—H12                | 0.9500   | C32—H32                   | 0.9500   |
| N2—N1—C15              | 117.7(3) | C1—C15—H15A               | 108.1    |
| C16—N1—N2              | 108.0(3) | C1—C15—H15B               | 108.1    |
| C16—N1—C15             | 134.3(3) | H15A—C15—H15B             | 107.3    |
| N3—N2—N1               | 106.5(3) | N1—C16—H16                | 125.2    |
| N2—N3—N4               | 110.7(3) | N4—C16—N1                 | 109.6(3) |
| C16—N4—N3              | 105.3(3) | N4—C16—H16                | 125.2    |
| N6—N5—C31              | 118.7(3) | C18—C17—C24 <sup>ii</sup> | 109.3(3) |
| C32—N5—N6              | 107.9(3) | C18—C17—C31               | 112.5(3) |
| C32—N5—C31             | 133.3(3) | C30—C17—C18               | 109.2(3) |
| N7—N6—N5               | 106.6(3) | C30—C17—C24 <sup>ii</sup> | 109.0(3) |
| N6—N7—N8               | 110.6(3) | C30—C17—C31               | 112.8(3) |
| C32—N8—N7              | 105.2(3) | C31—C17—C24 <sup>ii</sup> | 103.8(3) |
| C2—C1—C8 <sup>i</sup>  | 110.9(3) | C19—C18—C17               | 124.8(3) |
| C14—C1—C2              | 107.5(3) | C19—C18—C23               | 118.7(3) |
| C14—C1—C8 <sup>i</sup> | 109.4(3) | C23—C18—C17               | 116.4(3) |
| C15—C1—C2              | 113.3(3) | C18—C19—H19               | 119.6    |
| C15—C1—C8 <sup>i</sup> | 102.3(3) | C20—C19—C18               | 120.8(3) |
| C15—C1—C14             | 113.3(3) | C20—C19—H19               | 119.6    |
| C3—C2—C1               | 124.4(3) | C19—C20—H20               | 119.9    |
| C3—C2—C7               | 118.8(3) | C21—C20—C19               | 120.3(3) |
| C7—C2—C1               | 116.8(3) | C21—C20—H20               | 119.9    |
| C2—C3—H3               | 119.8    | C20—C21—H21               | 120.2    |
| C4—C3—C2               | 120.4(3) | C20—C21—C22               | 119.5(3) |
| C4—C3—H3               | 119.8    | C22—C21—H21               | 120.2    |
| C3—C4—H4               | 119.5    | C21—C22—H22               | 119.6    |
| C3—C4—C5               | 120.9(4) | C23—C22—C21               | 120.8(3) |

|                            |           |                                |           |
|----------------------------|-----------|--------------------------------|-----------|
| C5—C4—H4                   | 119.5     | C23—C22—H22                    | 119.6     |
| C4—C5—H5                   | 120.3     | C18—C23—C24                    | 117.7(3)  |
| C6—C5—C4                   | 119.5(3)  | C22—C23—C18                    | 120.0(3)  |
| C6—C5—H5                   | 120.3     | C22—C23—C24                    | 122.3(3)  |
| C5—C6—H6                   | 120.1     | C17 <sup>ii</sup> —C24—H24     | 107.6     |
| C5—C6—C7                   | 119.9(3)  | C23—C24—C17 <sup>ii</sup>      | 111.6(3)  |
| C7—C6—H6                   | 120.1     | C23—C24—H24                    | 107.6     |
| C2—C7—C8                   | 117.5(3)  | C25—C24—C17 <sup>ii</sup>      | 112.6(3)  |
| C6—C7—C2                   | 120.6(3)  | C25—C24—C23                    | 109.6(3)  |
| C6—C7—C8                   | 122.0(3)  | C25—C24—H24                    | 107.6     |
| C1 <sup>i</sup> —C8—H8     | 107.2     | C26—C25—C24                    | 121.9(3)  |
| C7—C8—C1 <sup>i</sup>      | 112.9(3)  | C26—C25—C30                    | 119.6(3)  |
| C7—C8—H8                   | 107.2     | C30—C25—C24                    | 118.4(3)  |
| C7—C8—C9                   | 108.9(3)  | C25—C26—H26                    | 119.7     |
| C9—C8—C1 <sup>i</sup>      | 113.0(3)  | C27—C26—C25                    | 120.5(3)  |
| C9—C8—H8                   | 107.2     | C27—C26—H26                    | 119.7     |
| C10—C9—C8                  | 122.2(3)  | C26—C27—H27                    | 119.9     |
| C10—C9—C14                 | 120.0(3)  | C28—C27—C26                    | 120.1(4)  |
| C14—C9—C8                  | 117.8(3)  | C28—C27—H27                    | 119.9     |
| C9—C10—H10                 | 119.8     | C27—C28—H28                    | 120.1     |
| C11—C10—C9                 | 120.4(3)  | C27—C28—C29                    | 119.9(3)  |
| C11—C10—H10                | 119.8     | C29—C28—H28                    | 120.1     |
| C10—C11—H11                | 120.2     | C28—C29—H29                    | 119.7     |
| C10—C11—C12                | 119.6(4)  | C30—C29—C28                    | 120.6(3)  |
| C12—C11—H11                | 120.2     | C30—C29—H29                    | 119.7     |
| C11—C12—H12                | 119.9     | C25—C30—C17                    | 116.4(3)  |
| C13—C12—C11                | 120.1(3)  | C29—C30—C17                    | 124.2(3)  |
| C13—C12—H12                | 119.9     | C29—C30—C25                    | 119.2(3)  |
| C12—C13—H13                | 119.5     | N5—C31—C17                     | 115.6(3)  |
| C12—C13—C14                | 121.1(3)  | N5—C31—H31A                    | 108.4     |
| C14—C13—H13                | 119.5     | N5—C31—H31B                    | 108.4     |
| C9—C14—C1                  | 116.4(3)  | C17—C31—H31A                   | 108.4     |
| C13—C14—C1                 | 124.9(3)  | C17—C31—H31B                   | 108.4     |
| C13—C14—C9                 | 118.7(3)  | H31A—C31—H31B                  | 107.4     |
| N1—C15—C1                  | 116.8(3)  | N5—C32—H32                     | 125.1     |
| N1—C15—H15A                | 108.1     | N8—C32—N5                      | 109.8(3)  |
| N1—C15—H15B                | 108.1     | N8—C32—H32                     | 125.1     |
| N1—N2—N3—N4                | 0.5(4)    | C15—C1—C2—C7                   | 172.1(3)  |
| N2—N1—C15—C1               | 165.7(3)  | C15—C1—C14—C9                  | -169.6(3) |
| N2—N1—C16—N4               | 0.9(4)    | C15—C1—C14—C13                 | 13.8(5)   |
| N2—N3—N4—C16               | 0.1(4)    | C16—N1—N2—N3                   | -0.8(4)   |
| N3—N4—C16—N1               | -0.6(4)   | C16—N1—C15—C1                  | -15.9(5)  |
| N5—N6—N7—N8                | -0.2(4)   | C17—C18—C19—C20                | -175.0(3) |
| N6—N5—C31—C17              | -169.0(3) | C17—C18—C23—C22                | 175.7(3)  |
| N6—N5—C32—N8               | 0.0(4)    | C17—C18—C23—C24                | -1.9(4)   |
| N6—N7—N8—C32               | 0.2(4)    | C17 <sup>ii</sup> —C24—C25—C26 | 95.7(4)   |
| N7—N8—C32—N5               | -0.1(4)   | C17 <sup>ii</sup> —C24—C25—C30 | -81.0(4)  |
| C1—C2—C3—C4                | -177.9(3) | C18—C17—C30—C25                | -43.1(4)  |
| C1—C2—C7—C6                | 176.9(3)  | C18—C17—C30—C29                | 142.3(3)  |
| C1—C2—C7—C8                | -2.4(4)   | C18—C17—C31—N5                 | -67.1(4)  |
| C1 <sup>i</sup> —C8—C9—C10 | 98.5(4)   | C18—C19—C20—C21                | -0.5(5)   |
| C1 <sup>i</sup> —C8—C9—C14 | -80.1(4)  | C18—C23—C24—C17 <sup>ii</sup>  | 83.3(3)   |
| C2—C1—C14—C9               | -43.6(4)  | C18—C23—C24—C25                | -42.1(4)  |
| C2—C1—C14—C13              | 139.8(3)  | C19—C18—C23—C22                | -0.3(5)   |
| C2—C1—C15—N1               | -58.6(4)  | C19—C18—C23—C24                | -177.9(3) |
| C2—C3—C4—C5                | 1.4(5)    | C19—C20—C21—C22                | 0.0(5)    |
| C2—C7—C8—C1 <sup>i</sup>   | 82.6(4)   | C20—C21—C22—C23                | 0.3(5)    |
| C2—C7—C8—C9                | -43.8(4)  | C21—C22—C23—C18                | -0.1(5)   |
| C3—C2—C7—C6                | -1.0(5)   | C21—C22—C23—C24                | 177.3(3)  |
| C3—C2—C7—C8                | 179.7(3)  | C22—C23—C24—C17 <sup>ii</sup>  | -94.2(4)  |
| C3—C4—C5—C6                | -1.5(5)   | C22—C23—C24—C25                | 140.4(3)  |
| C4—C5—C6—C7                | 0.3(5)    | C23—C18—C19—C20                | 0.6(5)    |
| C5—C6—C7—C2                | 0.9(5)    | C23—C24—C25—C26                | -139.4(3) |
| C5—C6—C7—C8                | -179.8(3) | C23—C24—C25—C30                | 43.8(4)   |

|                             |           |                                |           |
|-----------------------------|-----------|--------------------------------|-----------|
| C6—C7—C8—C1 <sup>i</sup>    | -96.7(4)  | C24 <sup>ii</sup> —C17—C18—C19 | 101.0(3)  |
| C6—C7—C8—C9                 | 136.9(3)  | C24 <sup>ii</sup> —C17—C18—C23 | -74.8(4)  |
| C7—C2—C3—C4                 | -0.1(5)   | C24 <sup>ii</sup> —C17—C30—C25 | 76.3(3)   |
| C7—C8—C9—C10                | -135.1(3) | C24 <sup>ii</sup> —C17—C30—C29 | -98.3(4)  |
| C7—C8—C9—C14                | 46.2(4)   | C24 <sup>ii</sup> —C17—C31—N5  | 174.8(3)  |
| C8 <sup>i</sup> —C1—C2—C3   | 104.2(4)  | C24—C25—C26—C27                | -174.8(3) |
| C8 <sup>i</sup> —C1—C2—C7   | -73.6(4)  | C24—C25—C30—C17                | -0.9(4)   |
| C8 <sup>i</sup> —C1—C14—C9  | 76.9(4)   | C24—C25—C30—C29                | 174.0(3)  |
| C8 <sup>i</sup> —C1—C14—C13 | -99.6(4)  | C25—C26—C27—C28                | -0.1(5)   |
| C8 <sup>i</sup> —C1—C15—N1  | -178.0(3) | C26—C25—C30—C17                | -177.7(3) |
| C8—C9—C10—C11               | -174.9(3) | C26—C25—C30—C29                | -2.9(5)   |
| C8—C9—C14—C1                | -1.7(4)   | C26—C27—C28—C29                | -0.8(5)   |
| C8—C9—C14—C13               | 175.1(3)  | C27—C28—C29—C30                | -0.2(5)   |
| C9—C10—C11—C12              | -1.6(5)   | C28—C29—C30—C17                | 176.4(3)  |
| C10—C9—C14—C1               | 179.6(3)  | C28—C29—C30—C25                | 2.0(5)    |
| C10—C9—C14—C13              | -3.6(5)   | C30—C17—C18—C19                | -139.8(3) |
| C10—C11—C12—C13             | -0.6(6)   | C30—C17—C18—C23                | 44.4(4)   |
| C11—C12—C13—C14             | 0.7(6)    | C30—C17—C31—N5                 | 57.0(4)   |
| C12—C13—C14—C1              | 177.9(3)  | C30—C25—C26—C27                | 1.9(5)    |
| C12—C13—C14—C9              | 1.4(5)    | C31—N5—N6—N7                   | 176.1(3)  |
| C14—C1—C2—C3                | -136.1(3) | C31—N5—C32—N8                  | -175.2(3) |
| C14—C1—C2—C7                | 46.0(4)   | C31—C17—C18—C19                | -13.8(5)  |
| C14—C1—C15—N1               | 64.3(4)   | C31—C17—C18—C23                | 170.5(3)  |
| C14—C9—C10—C11              | 3.8(5)    | C31—C17—C30—C25                | -169.0(3) |
| C15—N1—N2—N3                | 178.0(3)  | C31—C17—C30—C29                | 16.4(5)   |
| C15—N1—C16—N4               | -177.7(3) | C32—N5—N6—N7                   | 0.2(4)    |
| C15—C1—C2—C3                | -10.1(5)  | C32—N5—C31—C17                 | 5.8(6)    |

**Table 15:** Geometric parameters of **L2-s1** (Å, °), symmetry code: (i) -x+2, -y+1, -z+1)

|                        |            |             |            |
|------------------------|------------|-------------|------------|
| N1—N2                  | 1.3452(15) | C8—H8       | 1.0000     |
| N1—C15                 | 1.4731(15) | C8—C9       | 1.5151(16) |
| N1—C16                 | 1.3335(16) | C9—C10      | 1.3899(17) |
| N2—N3                  | 1.2977(16) | C9—C14      | 1.3988(16) |
| N3—N4                  | 1.3598(16) | C10—H10     | 0.9500     |
| N4—C16                 | 1.3122(16) | C10—C11     | 1.3945(18) |
| N5—C17                 | 1.1420(19) | C11—H11     | 0.9500     |
| C1—C2                  | 1.5366(16) | C11—C12     | 1.3820(18) |
| C1—C8 <sup>i</sup>     | 1.6230(16) | C12—H12     | 0.9500     |
| C1—C14                 | 1.5355(16) | C12—C13     | 1.3938(17) |
| C1—C15                 | 1.5319(16) | C13—H13     | 0.9500     |
| C2—C3                  | 1.3893(17) | C13—C14     | 1.3952(17) |
| C2—C7                  | 1.3970(17) | C15—H15A    | 0.9900     |
| C3—H3                  | 0.9500     | C15—H15B    | 0.9900     |
| C3—C4                  | 1.3947(18) | C16—H16     | 0.9500     |
| C4—H4                  | 0.9500     | C17—C18     | 1.451(2)   |
| C4—C5                  | 1.3817(18) | C18—H18A    | 0.9800     |
| C5—H5                  | 0.9500     | C18—H18B    | 0.9800     |
| C5—C6                  | 1.3835(18) | C18—H18C    | 0.9800     |
| C6—H6                  | 0.9500     | C18—H18D    | 0.9800     |
| C6—C7                  | 1.3914(17) | C18—H18E    | 0.9800     |
| C7—C8                  | 1.5062(16) | C18—H18F    | 0.9800     |
| C8—C1 <sup>i</sup>     | 1.6230(16) |             |            |
| N2—N1—C15              | 118.87(10) | C14—C9—C8   | 118.13(10) |
| C16—N1—N2              | 107.83(10) | C9—C10—H10  | 119.8      |
| C16—N1—C15             | 133.11(10) | C9—C10—C11  | 120.39(11) |
| N3—N2—N1               | 106.32(10) | C11—C10—H10 | 119.8      |
| N2—N3—N4               | 111.11(10) | C10—C11—H11 | 120.2      |
| C16—N4—N3              | 104.88(10) | C12—C11—C10 | 119.57(11) |
| C2—C1—C8 <sup>i</sup>  | 109.78(9)  | C12—C11—H11 | 120.2      |
| C14—C1—C2              | 107.45(9)  | C11—C12—H12 | 119.8      |
| C14—C1—C8 <sup>i</sup> | 110.58(9)  | C11—C12—C13 | 120.31(12) |
| C15—C1—C2              | 113.15(10) | C13—C12—H12 | 119.8      |

|                            |             |                             |             |
|----------------------------|-------------|-----------------------------|-------------|
| C15—C1—C8 <sup>i</sup>     | 103.18(9)   | C12—C13—H13                 | 119.8       |
| C15—C1—C14                 | 112.69(10)  | C12—C13—C14                 | 120.49(11)  |
| C3—C2—C1                   | 124.40(11)  | C14—C13—H13                 | 119.8       |
| C3—C2—C7                   | 118.71(11)  | C9—C14—C1                   | 116.64(10)  |
| C7—C2—C1                   | 116.88(10)  | C13—C14—C1                  | 124.40(10)  |
| C2—C3—H3                   | 119.8       | C13—C14—C9                  | 118.95(11)  |
| C2—C3—C4                   | 120.37(11)  | N1—C15—C1                   | 114.64(9)   |
| C4—C3—H3                   | 119.8       | N1—C15—H15A                 | 108.6       |
| C3—C4—H4                   | 119.8       | N1—C15—H15B                 | 108.6       |
| C5—C4—C3                   | 120.46(11)  | C1—C15—H15A                 | 108.6       |
| C5—C4—H4                   | 119.8       | C1—C15—H15B                 | 108.6       |
| C4—C5—H5                   | 120.2       | H15A—C15—H15B               | 107.6       |
| C4—C5—C6                   | 119.67(12)  | N1—C16—H16                  | 125.1       |
| C6—C5—H5                   | 120.2       | N4—C16—N1                   | 109.86(11)  |
| C5—C6—H6                   | 119.9       | N4—C16—H16                  | 125.1       |
| C5—C6—C7                   | 120.13(11)  | N5—C17—C18                  | 179.14(16)  |
| C7—C6—H6                   | 119.9       | C17—C18—H18A                | 109.5       |
| C2—C7—C8                   | 118.11(10)  | C17—C18—H18B                | 109.5       |
| C6—C7—C2                   | 120.62(11)  | C17—C18—H18C                | 109.5       |
| C6—C7—C8                   | 121.27(11)  | C17—C18—H18D                | 109.5       |
| C1 <sup>i</sup> —C8—H8     | 107.5       | C17—C18—H18E                | 109.5       |
| C7—C8—C1 <sup>i</sup>      | 112.97(9)   | C17—C18—H18F                | 109.5       |
| C7—C8—H8                   | 107.5       | H18A—C18—H18B               | 109.5       |
| C7—C8—C9                   | 107.72(9)   | H18A—C18—H18C               | 109.5       |
| C9—C8—C1 <sup>i</sup>      | 113.32(9)   | H18B—C18—H18C               | 109.5       |
| C9—C8—H8                   | 107.5       | H18D—C18—H18E               | 109.5       |
| C10—C9—C8                  | 121.63(10)  | H18D—C18—H18F               | 109.5       |
| C10—C9—C14                 | 120.21(11)  | H18E—C18—H18F               | 109.5       |
| N1—N2—N3—N4                | 0.10(14)    | C8 <sup>i</sup> —C1—C2—C3   | 103.01(13)  |
| N2—N1—C15—C1               | 158.92(10)  | C8 <sup>i</sup> —C1—C2—C7   | -75.82(12)  |
| N2—N1—C16—N4               | 0.14(14)    | C8 <sup>i</sup> —C1—C14—C9  | 75.05(12)   |
| N2—N3—N4—C16               | -0.01(14)   | C8 <sup>i</sup> —C1—C14—C13 | -106.31(12) |
| N3—N4—C16—N1               | -0.08(14)   | C8 <sup>i</sup> —C1—C15—N1  | -174.36(9)  |
| C1—C2—C3—C4                | 178.99(11)  | C8—C9—C10—C11               | 175.95(11)  |
| C1—C2—C7—C6                | -179.10(10) | C8—C9—C14—C1                | 0.30(15)    |
| C1—C2—C7—C8                | 0.52(15)    | C8—C9—C14—C13               | -178.41(10) |
| C1 <sup>i</sup> —C8—C9—C10 | 101.22(12)  | C9—C10—C11—C12              | 2.20(18)    |
| C1 <sup>i</sup> —C8—C9—C14 | -80.88(12)  | C10—C9—C14—C1               | 178.24(10)  |
| C2—C1—C14—C9               | -44.74(13)  | C10—C9—C14—C13              | -0.48(17)   |
| C2—C1—C14—C13              | 133.89(11)  | C10—C11—C12—C13             | -0.11(18)   |
| C2—C1—C15—N1               | -55.81(13)  | C11—C12—C13—C14             | -2.29(18)   |
| C2—C3—C4—C5                | 0.87(19)    | C12—C13—C14—C1              | -176.04(11) |
| C2—C7—C8—C1 <sup>i</sup>   | 80.70(13)   | C12—C13—C14—C9              | 2.57(17)    |
| C2—C7—C8—C9                | -45.23(13)  | C14—C1—C2—C3                | -136.68(11) |
| C3—C2—C7—C6                | 2.00(17)    | C14—C1—C2—C7                | 44.49(13)   |
| C3—C2—C7—C8                | -178.38(10) | C14—C1—C15—N1               | 66.35(13)   |
| C3—C4—C5—C6                | 0.71(19)    | C14—C9—C10—C11              | -1.91(18)   |
| C4—C5—C6—C7                | -0.91(19)   | C15—N1—N2—N3                | -175.79(10) |
| C5—C6—C7—C2                | -0.45(18)   | C15—N1—C16—N4               | 174.92(12)  |
| C5—C6—C7—C8                | 179.94(11)  | C15—C1—C2—C3                | -11.65(16)  |
| C6—C7—C8—C1 <sup>i</sup>   | -99.68(12)  | C15—C1—C2—C7                | 169.52(10)  |
| C6—C7—C8—C9                | 134.39(11)  | C15—C1—C14—C9               | -170.05(10) |
| C7—C2—C3—C4                | -2.20(18)   | C15—C1—C14—C13              | 8.58(16)    |
| C7—C8—C9—C10               | -133.06(11) | C16—N1—N2—N3                | -0.14(13)   |
| C7—C8—C9—C14               | 44.85(13)   | C16—N1—C15—C1               | -15.40(18)  |

**Table 16:** Geometric parameters of **L2-s2** (Å, °), symmetry code: (i) -x+2, -y+2, -z+1

|          |          |       |          |
|----------|----------|-------|----------|
| O1—H1    | 0.8400   | C5—H5 | 0.9500   |
| O1—C17   | 1.411(4) | C5—C6 | 1.387(5) |
| C17—H17A | 0.9800   | C6—H6 | 0.9500   |
| C17—H17B | 0.9800   | C6—C7 | 1.388(5) |
| C17—H17C | 0.9800   | C7—C8 | 1.515(4) |

|                            |           |                             |           |
|----------------------------|-----------|-----------------------------|-----------|
| N1—N2                      | 1.350(4)  | C8—C1 <sup>i</sup>          | 1.623(4)  |
| N1—C15                     | 1.472(4)  | C8—H8                       | 1.0000    |
| N1—C16                     | 1.323(4)  | C8—C9                       | 1.506(4)  |
| N2—N3                      | 1.298(4)  | C9—C10                      | 1.383(5)  |
| N3—N4                      | 1.355(4)  | C9—C14                      | 1.412(4)  |
| N4—C16                     | 1.322(4)  | C10—H10                     | 0.9500    |
| C1—C2                      | 1.534(4)  | C10—C11                     | 1.383(5)  |
| C1—C8 <sup>i</sup>         | 1.623(4)  | C11—H11                     | 0.9500    |
| C1—C14                     | 1.531(4)  | C11—C12                     | 1.386(5)  |
| C1—C15                     | 1.532(4)  | C12—H12                     | 0.9500    |
| C2—C3                      | 1.395(4)  | C12—C13                     | 1.389(5)  |
| C2—C7                      | 1.402(5)  | C13—H13                     | 0.9500    |
| C3—H3                      | 0.9500    | C13—C14                     | 1.388(5)  |
| C3—C4                      | 1.388(5)  | C15—H15A                    | 0.9900    |
| C4—H4                      | 0.9500    | C15—H15B                    | 0.9900    |
| C4—C5                      | 1.388(5)  | C16—H16                     | 0.9500    |
| C17—O1—H1                  | 109.5     | C6—C7—C2                    | 120.6(3)  |
| O1—C17—H17A                | 109.5     | C6—C7—C8                    | 121.9(3)  |
| O1—C17—H17B                | 109.5     | C1i—C8—H8                   | 107.4     |
| O1—C17—H17C                | 109.5     | C7—C8—C1 <sup>i</sup>       | 112.8(2)  |
| H17A—C17—H17B              | 109.5     | C7—C8—H8                    | 107.4     |
| H17A—C17—H17C              | 109.5     | C9—C8—C1 <sup>i</sup>       | 113.2(2)  |
| H17B—C17—H17C              | 109.5     | C9—C8—C7                    | 108.5(2)  |
| N2—N1—C15                  | 119.2(3)  | C9—C8—H8                    | 107.4     |
| C16—N1—N2                  | 108.0(3)  | C10—C9—C8                   | 122.3(3)  |
| C16—N1—C15                 | 132.7(3)  | C10—C9—C14                  | 119.9(3)  |
| N3—N2—N1                   | 106.5(3)  | C14—C9—C8                   | 117.8(3)  |
| N2—N3—N4                   | 110.6(2)  | C9—C10—H10                  | 119.7     |
| C16—N4—N3                  | 105.4(3)  | C11—C10—C9                  | 120.7(3)  |
| C2—C1—C8 <sup>i</sup>      | 109.8(2)  | C11—C10—H10                 | 119.7     |
| C14—C1—C2                  | 107.8(3)  | C10—C11—H11                 | 120.0     |
| C14—C1—C8 <sup>i</sup>     | 110.2(2)  | C10—C11—C12                 | 119.9(3)  |
| C14—C1—C15                 | 113.0(3)  | C12—C11—H11                 | 120.0     |
| C15—C1—C2                  | 112.6(2)  | C11—C12—H12                 | 120.1     |
| C15—C1—C8 <sup>i</sup>     | 103.2(2)  | C11—C12—C13                 | 119.8(3)  |
| C3—C2—C1                   | 124.5(3)  | C13—C12—H12                 | 120.1     |
| C3—C2—C7                   | 118.5(3)  | C12—C13—H13                 | 119.5     |
| C7—C2—C1                   | 117.0(3)  | C14—C13—C12                 | 121.1(3)  |
| C2—C3—H3                   | 119.7     | C14—C13—H13                 | 119.5     |
| C4—C3—C2                   | 120.6(3)  | C9—C14—C1                   | 116.6(3)  |
| C4—C3—H3                   | 119.7     | C13—C14—C1                  | 124.9(3)  |
| C3—C4—H4                   | 119.7     | C13—C14—C9                  | 118.5(3)  |
| C3—C4—C5                   | 120.6(3)  | N1—C15—C1                   | 115.4(3)  |
| C5—C4—H4                   | 119.7     | N1—C15—H15A                 | 108.4     |
| C4—C5—H5                   | 120.3     | N1—C15—H15B                 | 108.4     |
| C6—C5—C4                   | 119.3(3)  | C1—C15—H15A                 | 108.4     |
| C6—C5—H5                   | 120.3     | C1—C15—H15B                 | 108.4     |
| C5—C6—H6                   | 119.8     | H15A—C15—H15B               | 107.5     |
| C5—C6—C7                   | 120.4(3)  | N1—C16—H16                  | 125.3     |
| C7—C6—H6                   | 119.8     | N4—C16—N1                   | 109.5(3)  |
| C2—C7—C8                   | 117.5(3)  | N4—C16—H16                  | 125.3     |
| N1—N2—N3—N4                | -0.1(3)   | C8 <sup>i</sup> —C1—C2—C3   | 102.6(3)  |
| N2—N1—C15—C1               | 160.8(3)  | C8 <sup>i</sup> —C1—C2—C7   | -75.3(3)  |
| N2—N1—C16—N4               | 0.5(4)    | C8 <sup>i</sup> —C1—C14—C9  | 75.2(3)   |
| N2—N3—N4—C16               | 0.4(4)    | C8 <sup>i</sup> —C1—C14—C13 | -104.5(3) |
| N3—N4—C16—N1               | -0.5(4)   | C8 <sup>i</sup> —C1—C15—N1  | -175.5(2) |
| C1—C2—C3—C4                | 179.5(3)  | C8—C9—C10—C11               | 178.0(3)  |
| C1—C2—C7—C6                | -179.4(3) | C8—C9—C14—C1                | 0.2(4)    |
| C1—C2—C7—C8                | -0.3(4)   | C8—C9—C14—C13               | 179.9(3)  |
| C1 <sup>i</sup> —C8—C9—C10 | 98.5(3)   | C9—C10—C11—C12              | 1.9(5)    |
| C1 <sup>i</sup> —C8—C9—C14 | -81.3(3)  | C10—C9—C14—C1               | -179.5(3) |
| C2—C1—C14—C9               | -44.8(3)  | C10—C9—C14—C13              | 0.2(4)    |
| C2—C1—C14—C13              | 135.6(3)  | C10—C11—C12—C13             | 0.4(5)    |
| C2—C1—C15—N1               | -57.1(4)  | C11—C12—C13—C14             | -2.5(5)   |

|                          |           |                |           |
|--------------------------|-----------|----------------|-----------|
| C2—C3—C4—C5              | 1.1(5)    | C12—C13—C14—C1 | -178.1(3) |
| C2—C7—C8—C1 <sup>i</sup> | 81.5(3)   | C12—C13—C14—C9 | 2.2(4)    |
| C2—C7—C8—C9              | -44.7(4)  | C14—C1—C2—C3   | -137.2(3) |
| C3—C2—C7—C6              | 2.6(4)    | C14—C1—C2—C7   | 44.9(3)   |
| C3—C2—C7—C8              | -178.3(3) | C14—C1—C15—N1  | 65.5(3)   |
| C3—C4—C5—C6              | 0.5(5)    | C14—C9—C10—C11 | -2.2(4)   |
| C4—C5—C6—C7              | -0.5(5)   | C15—N1—N2—N3   | -178.3(3) |
| C5—C6—C7—C2              | -1.1(5)   | C15—N1—C16—N4  | 178.1(3)  |
| C5—C6—C7—C8              | 179.9(3)  | C15—C1—C2—C3   | -11.8(4)  |
| C6—C7—C8—C1 <sup>i</sup> | -99.4(3)  | C15—C1—C2—C7   | 170.3(3)  |
| C6—C7—C8—C9              | 134.4(3)  | C15—C1—C14—C9  | -170.0(3) |
| C7—C2—C3—C4              | -2.6(5)   | C15—C1—C14—C13 | 10.4(4)   |
| C7—C8—C9—C10             | -135.6(3) | C16—N1—N2—N3   | -0.2(3)   |
| C7—C8—C9—C14             | 44.7(4)   | C16—N1—C15—C1  | -16.7(5)  |

**Table 17:** Crystal data of compound **3**

|                                    |                                                                                              |
|------------------------------------|----------------------------------------------------------------------------------------------|
| Chemical formula                   | C <sub>73.30</sub> H <sub>63.90</sub> Cl <sub>2</sub> FeN <sub>18.70</sub> O <sub>9.30</sub> |
| <i>M</i> <sub>r</sub>              | 1482.30                                                                                      |
| Crystal system, space group        | Triclinic, <i>P</i> 1                                                                        |
| Temperature (K)                    | 100                                                                                          |
| <i>a</i> , <i>b</i> , <i>c</i> (Å) | 9.7159 (10), 12.2753 (12), 15.1700 (15)                                                      |
| $\alpha$ , $\beta$ , $\gamma$ (°)  | 104.378 (8), 95.644 (8), 95.602 (8)                                                          |
| <i>V</i> (Å <sup>3</sup> )         | 1730.1 (3)                                                                                   |
| <i>Z</i>                           | 1                                                                                            |
| Radiation type                     | Cu <i>K</i> $\alpha$                                                                         |
| $\mu$ (mm <sup>-1</sup> )          | 3.07                                                                                         |
| Crystal size (mm)                  | 0.07 × 0.05 × 0.02                                                                           |

**Table 18:** Data collection of compound **3**

|                                                                                                                                    |                                                                                                                                                                                                                                                                                                                        |
|------------------------------------------------------------------------------------------------------------------------------------|------------------------------------------------------------------------------------------------------------------------------------------------------------------------------------------------------------------------------------------------------------------------------------------------------------------------|
| Diffractometer                                                                                                                     | STOE STADIVARI                                                                                                                                                                                                                                                                                                         |
| Absorption correction                                                                                                              | Multi-scan STOE LANA, absorption correction by scaling of reflection intensities. J. Koziskova, F. Hahn, J. Richter, J. Kozisek, "Comparison of different absorption corrections on the model structure of tetrakis( $\mu$ 2-acetato)-diaqua-di-copper(II)", Acta Chimica Slovaca, vol. 9, no. 2, 2016, pp. 136 - 140. |
| <i>T</i> <sub>min</sub> , <i>T</i> <sub>max</sub>                                                                                  | 1.000, 1.000                                                                                                                                                                                                                                                                                                           |
| No. of measured, independent and observed [ <i>I</i> > 2 $\sigma$ ( <i>I</i> )] reflections                                        | 17074, 6305, 4650                                                                                                                                                                                                                                                                                                      |
| <i>R</i> <sub>int</sub>                                                                                                            | 0.071                                                                                                                                                                                                                                                                                                                  |
| (sin $\theta$ / $\lambda$ ) <sub>max</sub> (Å <sup>-1</sup> )                                                                      | 0.615                                                                                                                                                                                                                                                                                                                  |
| Refinement <i>R</i> [ <i>F</i> <sub>2</sub> > 2 $\sigma$ ( <i>F</i> <sub>2</sub> )], <i>wR</i> ( <i>F</i> <sub>2</sub> ), <i>S</i> | 0.127, 0.401, 1.61                                                                                                                                                                                                                                                                                                     |
| No. of reflections                                                                                                                 | 6305                                                                                                                                                                                                                                                                                                                   |
| No. of parameters                                                                                                                  | 486                                                                                                                                                                                                                                                                                                                    |
| H-atom treatment                                                                                                                   | H-atom parameters constrained                                                                                                                                                                                                                                                                                          |
| $\Delta\rho$ <sub>max</sub> , $\Delta\rho$ <sub>min</sub> (e Å <sup>-3</sup> )                                                     | 0.88, -0.69                                                                                                                                                                                                                                                                                                            |

**Table 19:** Geometric parameters of compound **3** (Å, °), symmetry codes: (i) -x+1, -y+1, -z+1; (ii) -x+2, -y+2, -z+1; (iii) -x+1, -y+1, -z+2

|                     |          |                        |           |
|---------------------|----------|------------------------|-----------|
| Fe1—O1              | 2.094(7) | C15—H15A               | 0.9900    |
| Fe1—N9              | 2.094(7) | C15—H15B               | 0.9900    |
| Fe1—O1 <sup>i</sup> | 2.094(7) | C16—H16                | 0.9500    |
| Fe1—N9 <sup>i</sup> | 2.094(7) | C17—C31                | 1.493(11) |
| Fe1—N4 <sup>i</sup> | 2.127(6) | C17—C30                | 1.523(10) |
| Fe1—N4              | 2.127(6) | C17—C18                | 1.563(10) |
| Fe1—N8 <sup>i</sup> | 2.139(5) | C17—C24 <sup>iii</sup> | 1.653(9)  |
| Fe1—N8              | 2.139(5) | C18—C23                | 1.366(11) |
| Cl1—O5              | 1.413(6) | C18—C19                | 1.408(11) |

|                                      |           |                            |           |
|--------------------------------------|-----------|----------------------------|-----------|
| C11—O3                               | 1.415(5)  | C19—C20                    | 1.362(12) |
| C11—O4                               | 1.420(6)  | C19—H19                    | 0.9500    |
| C11—O2                               | 1.456(5)  | C20—C21                    | 1.400(14) |
| N1—C16                               | 1.333(8)  | C20—H20                    | 0.9500    |
| N1—N2                                | 1.359(7)  | C21—C22                    | 1.362(13) |
| N1—C15                               | 1.480(9)  | C21—H21                    | 0.9500    |
| N2—N3                                | 1.273(8)  | C22—C23                    | 1.382(11) |
| N3—N4                                | 1.364(8)  | C22—H22                    | 0.9500    |
| N4—C16                               | 1.307(9)  | C23—C24                    | 1.527(10) |
| N5—C32                               | 1.320(9)  | C24—C25                    | 1.481(11) |
| N5—N6                                | 1.339(9)  | C24—C17 <sup>iii</sup>     | 1.653(9)  |
| N5—C31                               | 1.481(9)  | C24—H24                    | 1.0000    |
| N6—N7                                | 1.291(9)  | C25—C26                    | 1.366(10) |
| N7—N8                                | 1.339(9)  | C25—C30                    | 1.404(12) |
| N8—C32                               | 1.292(9)  | C26—C27                    | 1.417(12) |
| N10—C38                              | 1.34(5)   | C26—H26                    | 0.9500    |
| C1—C2                                | 1.517(10) | C27—C28                    | 1.360(14) |
| C1—C15                               | 1.521(9)  | C27—H27                    | 0.9500    |
| C1—C14                               | 1.525(9)  | C28—C29                    | 1.360(12) |
| C1—C8 <sup>ii</sup>                  | 1.689(10) | C28—H28                    | 0.9500    |
| C2—C3                                | 1.395(10) | C29—C30                    | 1.404(10) |
| C2—C7                                | 1.403(10) | C29—H29                    | 0.9500    |
| C3—C4                                | 1.366(12) | C31—H31A                   | 0.9900    |
| C3—H3                                | 0.9500    | C31—H31B                   | 0.9900    |
| C4—C5                                | 1.414(14) | C32—H32                    | 0.9500    |
| C4—H4                                | 0.9500    | C33—O1                     | 1.165(10) |
| C5—C6                                | 1.361(13) | C33—N9                     | 1.165(10) |
| C5—H5                                | 0.9500    | C33—C36                    | 1.361(17) |
| C6—C7                                | 1.391(11) | C33—C35                    | 1.39(2)   |
| C6—H6                                | 0.9500    | C33—C34                    | 1.41(3)   |
| C7—C8                                | 1.511(10) | C37—C38                    | 1.59(4)   |
| C8—C9                                | 1.464(11) | C37—H37A                   | 0.9800    |
| C8—C1 <sup>ii</sup>                  | 1.689(10) | C37—H37B                   | 0.9800    |
| C8—H8                                | 1.0000    | C37—H37C                   | 0.9800    |
| C9—C10                               | 1.392(10) | C34—H34A                   | 0.9800    |
| C9—C14                               | 1.405(10) | C34—H34B                   | 0.9800    |
| C10—C11                              | 1.377(14) | C34—H34C                   | 0.9800    |
| C10—H10                              | 0.9500    | C35—H35A                   | 0.9800    |
| C11—C12                              | 1.374(15) | C35—H35B                   | 0.9800    |
| C11—H11                              | 0.9500    | C35—H35C                   | 0.9800    |
| C12—C13                              | 1.377(13) | C36—H36A                   | 0.9800    |
| C12—H12                              | 0.9500    | C36—H36B                   | 0.9800    |
| C13—C14                              | 1.404(11) | C36—H36C                   | 0.9800    |
| C13—H13                              | 0.9500    |                            |           |
| O1—Fe1—O1 <sup>i</sup>               | 180.0     | C1—C15—H15A                | 108.4     |
| N9—Fe1—N9 <sup>i</sup>               | 180.0     | N1—C15—H15B                | 108.4     |
| O1—Fe1—N4 <sup>i</sup>               | 87.7(2)   | C1—C15—H15B                | 108.4     |
| N9—Fe1—N4 <sup>i</sup>               | 87.7(2)   | H15A—C15—H15B              | 107.5     |
| O1 <sup>i</sup> —Fe1—N4 <sup>i</sup> | 92.3(2)   | N4—C16—N1                  | 107.9(6)  |
| N9 <sup>i</sup> —Fe1—N4 <sup>i</sup> | 92.3(2)   | N4—C16—H16                 | 126.0     |
| O1—Fe1—N4                            | 92.3(2)   | N1—C16—H16                 | 126.0     |
| N9—Fe1—N4                            | 92.3(2)   | C31—C17—C30                | 114.4(6)  |
| O1 <sup>i</sup> —Fe1—N4              | 87.7(2)   | C31—C17—C18                | 113.6(6)  |
| N9 <sup>i</sup> —Fe1—N4              | 87.7(2)   | C30—C17—C18                | 106.6(6)  |
| N4 <sup>i</sup> —Fe1—N4              | 180.0     | C31—C17—C24 <sup>iii</sup> | 104.2(6)  |
| O1—Fe1—N8 <sup>i</sup>               | 92.0(2)   | C30—C17—C24 <sup>iii</sup> | 109.2(6)  |
| N9—Fe1—N8 <sup>i</sup>               | 92.0(2)   | C18—C17—C24 <sup>iii</sup> | 108.8(5)  |
| O1 <sup>i</sup> —Fe1—N8 <sup>i</sup> | 88.0(2)   | C23—C18—C19                | 118.2(7)  |
| N9 <sup>i</sup> —Fe1—N8 <sup>i</sup> | 88.0(2)   | C23—C18—C17                | 118.4(6)  |
| N4 <sup>i</sup> —Fe1—N8 <sup>i</sup> | 89.7(2)   | C19—C18—C17                | 123.2(7)  |
| N4—Fe1—N8 <sup>i</sup>               | 90.3(2)   | C20—C19—C18                | 120.2(8)  |
| O1—Fe1—N8                            | 88.0(2)   | C20—C19—H19                | 119.9     |
| N9—Fe1—N8                            | 88.0(2)   | C18—C19—H19                | 119.9     |
| O1 <sup>i</sup> —Fe1—N8              | 92.0(2)   | C19—C20—C21                | 121.2(8)  |

|                         |          |                             |           |
|-------------------------|----------|-----------------------------|-----------|
| N9 <sup>i</sup> —Fe1—N8 | 92.0(2)  | C19—C20—H20                 | 119.4     |
| N4 <sup>i</sup> —Fe1—N8 | 90.3(2)  | C21—C20—H20                 | 119.4     |
| N4—Fe1—N8               | 89.7(2)  | C22—C21—C20                 | 117.8(7)  |
| N8 <sup>i</sup> —Fe1—N8 | 180.0(3) | C22—C21—H21                 | 121.1     |
| O5—C11—O3               | 109.4(4) | C20—C21—H21                 | 121.1     |
| O5—C11—O4               | 110.3(4) | C21—C22—C23                 | 121.7(8)  |
| O3—C11—O4               | 109.5(4) | C21—C22—H22                 | 119.2     |
| O5—C11—O2               | 108.4(4) | C23—C22—H22                 | 119.2     |
| O3—C11—O2               | 110.2(4) | C18—C23—C22                 | 120.7(7)  |
| O4—C11—O2               | 109.1(3) | C18—C23—C24                 | 117.3(6)  |
| C16—N1—N2               | 108.7(5) | C22—C23—C24                 | 121.9(7)  |
| C16—N1—C15              | 133.5(5) | C25—C24—C23                 | 109.5(6)  |
| N2—N1—C15               | 117.8(5) | C25—C24—C17 <sup>iii</sup>  | 112.2(6)  |
| N3—N2—N1                | 106.1(5) | C23—C24—C17 <sup>iii</sup>  | 112.8(6)  |
| N2—N3—N4                | 110.8(5) | C25—C24—H24                 | 107.4     |
| C16—N4—N3               | 106.4(5) | C23—C24—H24                 | 107.4     |
| C16—N4—Fe1              | 130.7(5) | C17 <sup>iii</sup> —C24—H24 | 107.4     |
| N3—N4—Fe1               | 122.3(4) | C26—C25—C30                 | 120.4(7)  |
| C32—N5—N6               | 105.7(6) | C26—C25—C24                 | 122.3(8)  |
| C32—N5—C31              | 135.0(6) | C30—C25—C24                 | 117.4(7)  |
| N6—N5—C31               | 119.2(6) | C25—C26—C27                 | 119.7(9)  |
| N7—N6—N5                | 109.0(6) | C25—C26—H26                 | 120.1     |
| N6—N7—N8                | 107.9(6) | C27—C26—H26                 | 120.1     |
| C32—N8—N7               | 107.3(6) | C28—C27—C26                 | 119.8(8)  |
| C32—N8—Fe1              | 130.0(5) | C28—C27—H27                 | 120.1     |
| N7—N8—Fe1               | 122.7(4) | C26—C27—H27                 | 120.1     |
| C2—C1—C15               | 113.3(5) | C27—C28—C29                 | 120.7(8)  |
| C2—C1—C14               | 108.4(6) | C27—C28—H28                 | 119.6     |
| C15—C1—C14              | 113.5(6) | C29—C28—H28                 | 119.6     |
| C2—C1—C8 <sup>ii</sup>  | 109.5(6) | C28—C29—C30                 | 121.1(8)  |
| C15—C1—C8 <sup>ii</sup> | 103.0(5) | C28—C29—H29                 | 119.5     |
| C14—C1—C8 <sup>ii</sup> | 108.8(5) | C30—C29—H29                 | 119.5     |
| C3—C2—C7                | 118.0(7) | C25—C30—C29                 | 118.2(7)  |
| C3—C2—C1                | 124.1(6) | C25—C30—C17                 | 118.5(6)  |
| C7—C2—C1                | 117.9(6) | C29—C30—C17                 | 123.2(7)  |
| C4—C3—C2                | 122.0(8) | N5—C31—C17                  | 116.9(6)  |
| C4—C3—H3                | 119.0    | N5—C31—H31A                 | 108.1     |
| C2—C3—H3                | 119.0    | C17—C31—H31A                | 108.1     |
| C3—C4—C5                | 119.2(8) | N5—C31—H31B                 | 108.1     |
| C3—C4—H4                | 120.4    | C17—C31—H31B                | 108.1     |
| C5—C4—H4                | 120.4    | H31A—C31—H31B               | 107.3     |
| C6—C5—C4                | 119.5(9) | N8—C32—N5                   | 110.0(7)  |
| C6—C5—H5                | 120.2    | N8—C32—H32                  | 125.0     |
| C4—C5—H5                | 120.2    | N5—C32—H32                  | 125.0     |
| C5—C6—C7                | 121.2(9) | O1—C33—C36                  | 109.1(10) |
| C5—C6—H6                | 119.4    | O1—C33—C35                  | 130(2)    |
| C7—C6—H6                | 119.4    | C36—C33—C35                 | 121(2)    |
| C6—C7—C2                | 119.9(7) | N9—C33—C34                  | 172.3(15) |
| C6—C7—C8                | 122.9(7) | C38—C37—H37A                | 109.5     |
| C2—C7—C8                | 117.2(6) | C38—C37—H37B                | 109.5     |
| C9—C8—C7                | 108.5(6) | H37A—C37—H37B               | 109.5     |
| C9—C8—C1 <sup>ii</sup>  | 112.6(6) | C38—C37—H37C                | 109.5     |
| C7—C8—C1 <sup>ii</sup>  | 112.0(6) | H37A—C37—H37C               | 109.5     |
| C9—C8—H8                | 107.9    | H37B—C37—H37C               | 109.5     |
| C7—C8—H8                | 107.9    | N10—C38—C37                 | 169(2)    |
| C1 <sup>ii</sup> —C8—H8 | 107.9    | C33—N9—Fe1                  | 160.7(6)  |
| C10—C9—C14              | 118.4(7) | C33—C34—H34A                | 109.5     |
| C10—C9—C8               | 122.3(7) | C33—C34—H34B                | 109.5     |
| C14—C9—C8               | 119.0(6) | H34A—C34—H34B               | 109.5     |
| C11—C10—C9              | 121.1(8) | C33—C34—H34C                | 109.5     |
| C11—C10—H10             | 119.4    | H34A—C34—H34C               | 109.5     |
| C9—C10—H10              | 119.4    | H34B—C34—H34C               | 109.5     |
| C12—C11—C10             | 119.5(8) | C33—O1—Fe1                  | 160.7(6)  |
| C12—C11—H11             | 120.3    | C33—C35—H35A                | 109.5     |

|                              |           |                                 |           |
|------------------------------|-----------|---------------------------------|-----------|
| C10—C11—H11                  | 120.3     | C33—C35—H35B                    | 109.5     |
| C11—C12—C13                  | 121.7(9)  | H35A—C35—H35B                   | 109.5     |
| C11—C12—H12                  | 119.1     | C33—C35—H35C                    | 109.5     |
| C13—C12—H12                  | 119.1     | H35A—C35—H35C                   | 109.5     |
| C12—C13—C14                  | 118.7(9)  | H35B—C35—H35C                   | 109.5     |
| C12—C13—H13                  | 120.6     | C33—C36—H36A                    | 109.5     |
| C14—C13—H13                  | 120.6     | C33—C36—H36B                    | 109.5     |
| C13—C14—C9                   | 120.3(7)  | H36A—C36—H36B                   | 109.5     |
| C13—C14—C1                   | 123.0(6)  | C33—C36—H36C                    | 109.5     |
| C9—C14—C1                    | 116.7(6)  | H36A—C36—H36C                   | 109.5     |
| N1—C15—C1                    | 115.4(6)  | H36B—C36—H36C                   | 109.5     |
| N1—C15—H15A                  | 108.4     |                                 |           |
| C16—N1—N2—N3                 | 0.2(7)    | N3—N4—C16—N1                    | 0.7(7)    |
| C15—N1—N2—N3                 | 177.5(5)  | Fe1—N4—C16—N1                   | 171.8(4)  |
| N1—N2—N3—N4                  | 0.2(7)    | N2—N1—C16—N4                    | -0.6(7)   |
| N2—N3—N4—C16                 | -0.6(7)   | C15—N1—C16—N4                   | -177.3(6) |
| N2—N3—N4—Fe1                 | -172.6(4) | C31—C17—C18—C23                 | -168.5(6) |
| C32—N5—N6—N7                 | 0.6(8)    | C30—C17—C18—C23                 | -41.7(8)  |
| C31—N5—N6—N7                 | -177.0(6) | C24 <sup>iii</sup> —C17—C18—C23 | 75.9(8)   |
| N5—N6—N7—N8                  | -1.2(8)   | C31—C17—C18—C19                 | 15.9(9)   |
| N6—N7—N8—C32                 | 1.3(8)    | C30—C17—C18—C19                 | 142.8(7)  |
| N6—N7—N8—Fe1                 | -177.4(5) | C24 <sup>iii</sup> —C17—C18—C19 | -99.6(7)  |
| C15—C1—C2—C3                 | 13.4(11)  | C23—C18—C19—C20                 | 4.3(10)   |
| C14—C1—C2—C3                 | 140.5(8)  | C17—C18—C19—C20                 | 179.9(6)  |
| C8 <sup>ii</sup> —C1—C2—C3   | -101.0(9) | C18—C19—C20—C21                 | -1.3(11)  |
| C15—C1—C2—C7                 | -168.7(7) | C19—C20—C21—C22                 | -1.8(12)  |
| C14—C1—C2—C7                 | -41.7(9)  | C20—C21—C22—C23                 | 2.0(12)   |
| C8 <sup>ii</sup> —C1—C2—C7   | 76.9(8)   | C19—C18—C23—C22                 | -4.2(10)  |
| C7—C2—C3—C4                  | 3.6(14)   | C17—C18—C23—C22                 | -180.0(6) |
| C1—C2—C3—C4                  | -178.6(9) | C19—C18—C23—C24                 | 174.6(6)  |
| C2—C3—C4—C5                  | 0.1(18)   | C17—C18—C23—C24                 | -1.2(9)   |
| C3—C4—C5—C6                  | -4(2)     | C21—C22—C23—C18                 | 1.0(11)   |
| C4—C5—C6—C7                  | 4(2)      | C21—C22—C23—C24                 | -177.7(7) |
| C5—C6—C7—C2                  | 0.0(17)   | C18—C23—C24—C25                 | 44.7(9)   |
| C5—C6—C7—C8                  | 178.9(12) | C22—C23—C24—C25                 | -136.5(7) |
| C3—C2—C7—C6                  | -3.6(12)  | C18—C23—C24—C17 <sup>iii</sup>  | -81.0(8)  |
| C1—C2—C7—C6                  | 178.4(8)  | C22—C23—C24—C17 <sup>iii</sup>  | 97.8(8)   |
| C3—C2—C7—C8                  | 177.4(8)  | C23—C24—C25—C26                 | 135.1(7)  |
| C1—C2—C7—C8                  | -0.6(10)  | C17 <sup>iii</sup> —C24—C25—C26 | -98.8(8)  |
| C6—C7—C8—C9                  | -134.4(9) | C23—C24—C25—C30                 | -43.2(9)  |
| C2—C7—C8—C9                  | 44.6(9)   | C17 <sup>iii</sup> —C24—C25—C30 | 82.8(8)   |
| C6—C7—C8—C1 <sup>ii</sup>    | 100.7(9)  | C30—C25—C26—C27                 | -4.0(11)  |
| C2—C7—C8—C1 <sup>ii</sup>    | -80.3(8)  | C24—C25—C26—C27                 | 177.7(7)  |
| C7—C8—C9—C10                 | 141.0(8)  | C25—C26—C27—C28                 | 3.2(12)   |
| C1 <sup>ii</sup> —C8—C9—C10  | -94.5(9)  | C26—C27—C28—C29                 | -2.4(13)  |
| C7—C8—C9—C14                 | -46.1(9)  | C27—C28—C29—C30                 | 2.5(13)   |
| C1 <sup>ii</sup> —C8—C9—C14  | 78.5(8)   | C26—C25—C30—C29                 | 4.0(10)   |
| C14—C9—C10—C11               | 6.4(14)   | C24—C25—C30—C29                 | -177.6(6) |
| C8—C9—C10—C11                | 179.4(10) | C26—C25—C30—C17                 | -179.9(6) |
| C9—C10—C11—C12               | -5.7(18)  | C24—C25—C30—C17                 | -1.5(9)   |
| C10—C11—C12—C13              | 1.5(19)   | C28—C29—C30—C25                 | -3.2(11)  |
| C11—C12—C13—C14              | 1.8(17)   | C28—C29—C30—C17                 | -179.1(7) |
| C12—C13—C14—C9               | -0.9(13)  | C31—C17—C30—C25                 | 169.5(6)  |
| C12—C13—C14—C1               | 179.5(9)  | C18—C17—C30—C25                 | 43.2(8)   |
| C10—C9—C14—C13               | -3.1(11)  | C24 <sup>iii</sup> —C17—C30—C25 | -74.1(8)  |
| C8—C9—C14—C13                | -176.3(7) | C31—C17—C30—C29                 | -14.5(9)  |
| C10—C9—C14—C1                | 176.5(7)  | C18—C17—C30—C29                 | -140.9(7) |
| C8—C9—C14—C1                 | 3.3(9)    | C24 <sup>iii</sup> —C17—C30—C29 | 101.8(8)  |
| C2—C1—C14—C13                | -139.8(7) | C32—N5—C31—C17                  | 36.9(11)  |
| C15—C1—C14—C13               | -12.9(10) | N6—N5—C31—C17                   | -146.4(7) |
| C8 <sup>ii</sup> —C1—C14—C13 | 101.2(8)  | C30—C17—C31—N5                  | -71.4(8)  |
| C2—C1—C14—C9                 | 40.6(8)   | C18—C17—C31—N5                  | 51.2(8)   |
| C15—C1—C14—C9                | 167.5(6)  | C24 <sup>iii</sup> —C17—C31—N5  | 169.4(6)  |
| C8 <sup>ii</sup> —C1—C14—C9  | -78.4(7)  | N7—N8—C32—N5                    | -0.9(8)   |

|                             |           |                |          |
|-----------------------------|-----------|----------------|----------|
| C16—N1—C15—C1               | 23.5(10)  | Fe1—N8—C32—N5  | 177.7(4) |
| N2—N1—C15—C1                | -152.9(6) | N6—N5—C32—N8   | 0.2(8)   |
| C2—C1—C15—N1                | 54.3(8)   | C31—N5—C32—N8  | 177.2(7) |
| C14—C1—C15—N1               | -70.0(7)  | C36—C33—O1—Fe1 | 22(2)    |
| C8 <sup>ii</sup> —C1—C15—N1 | 172.6(5)  | C35—C33—O1—Fe1 | -163(2)  |

## References

1. J. Singh, N. Steck, D. De, A. Hofer, A. Ripp, I. Captain, M. Keller, P. A. Wender, R. Bhandari and H. J. Jessen, A Phosphoramidite Analogue of Cyclotriphosphate Enables Iterative Polyphosphorylations, *Angew. Chem. Int. Ed.*, 2019, **58**, 3928-3933.
2. *Germany Pat.*, DE P 21 47 023.5, 1971.
3. T. Degen, M. Sadki, E. Bron, U. König and G. Nénert, The HighScore suite, *Powder Diffr.*, 2014, **29**, 13-18.
4. G. M. Sheldrick, SHELXT - integrated space-group and crystal-structure determination, *Acta Crystallogr. Sect. A: Found. Crystallogr.*, 2015, **71**, 3-8.
5. G. M. Sheldrick, Crystal structure refinement with SHELXL, *Acta Crystallogr. Sect. C: Cryst. Struct. Commun.*, 2015, **71**, 3-8.

## NMR Spectra

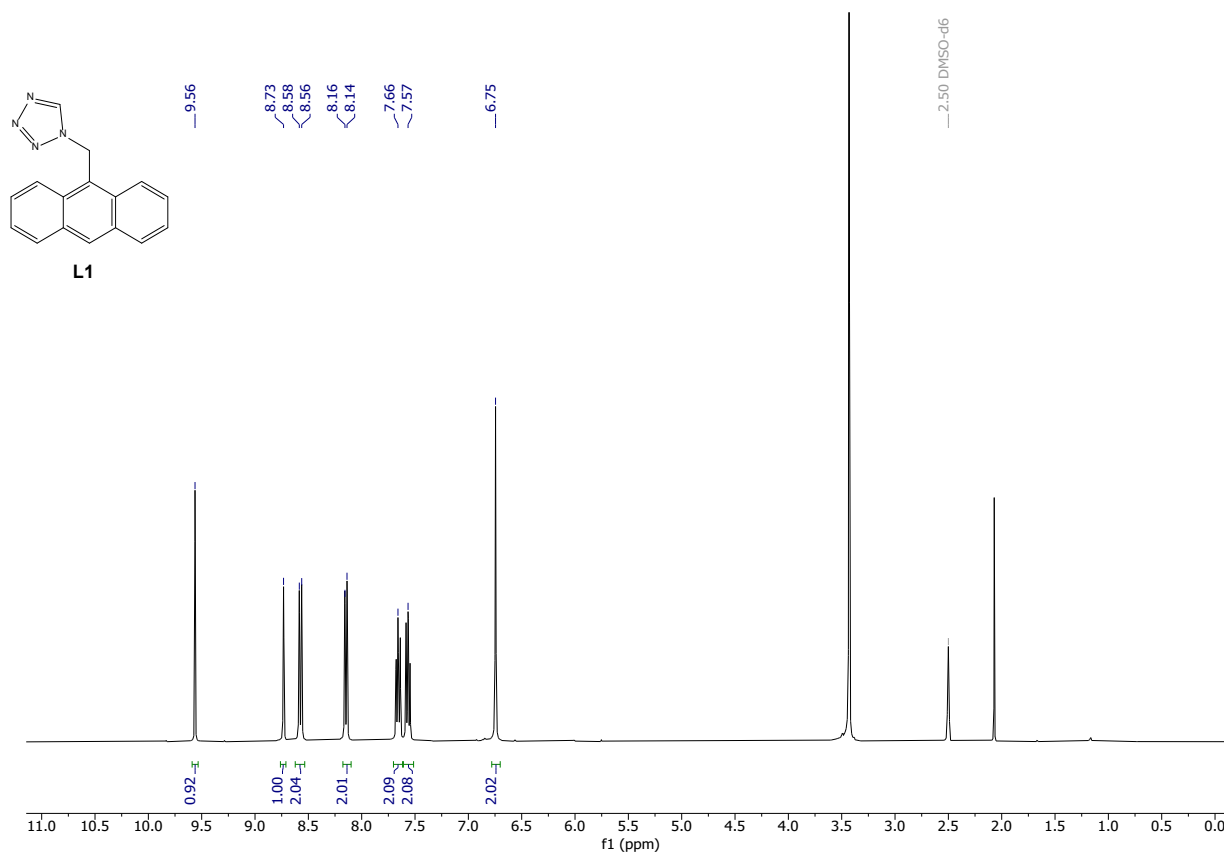

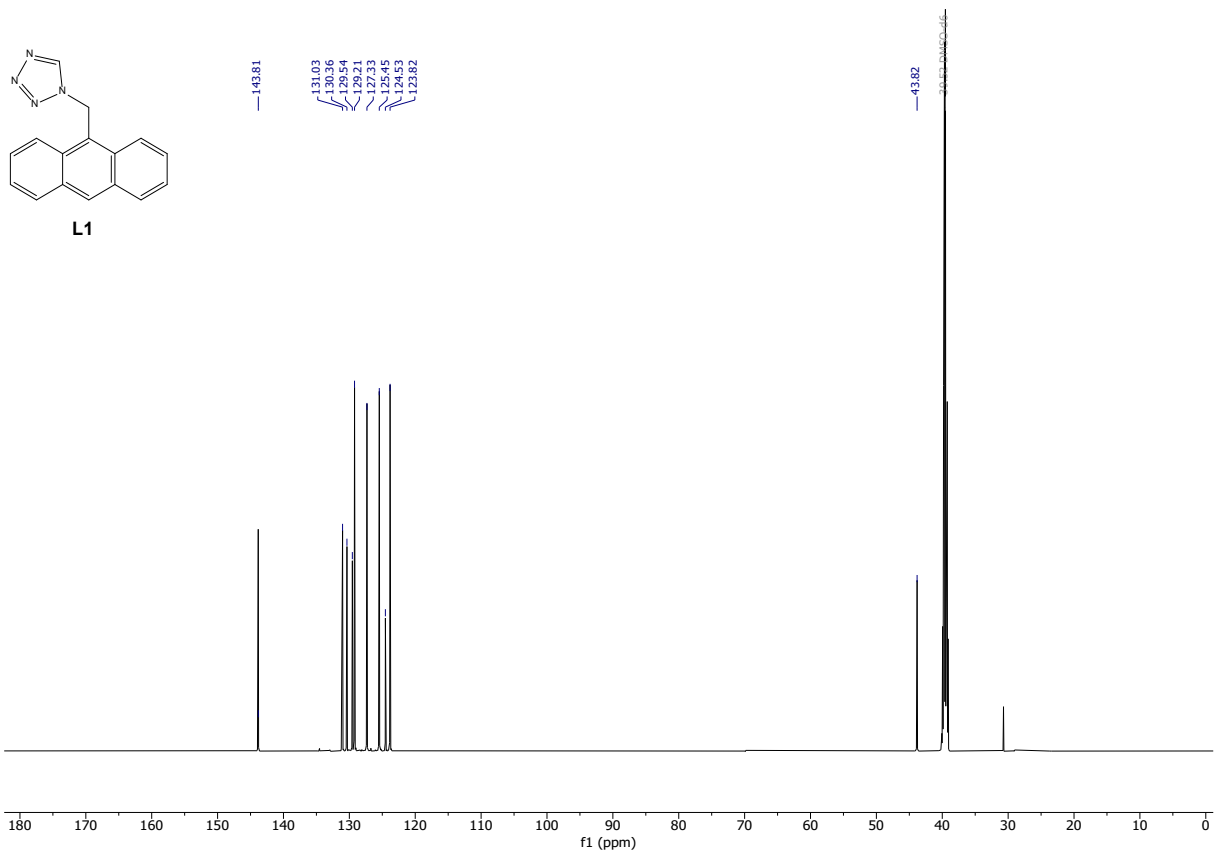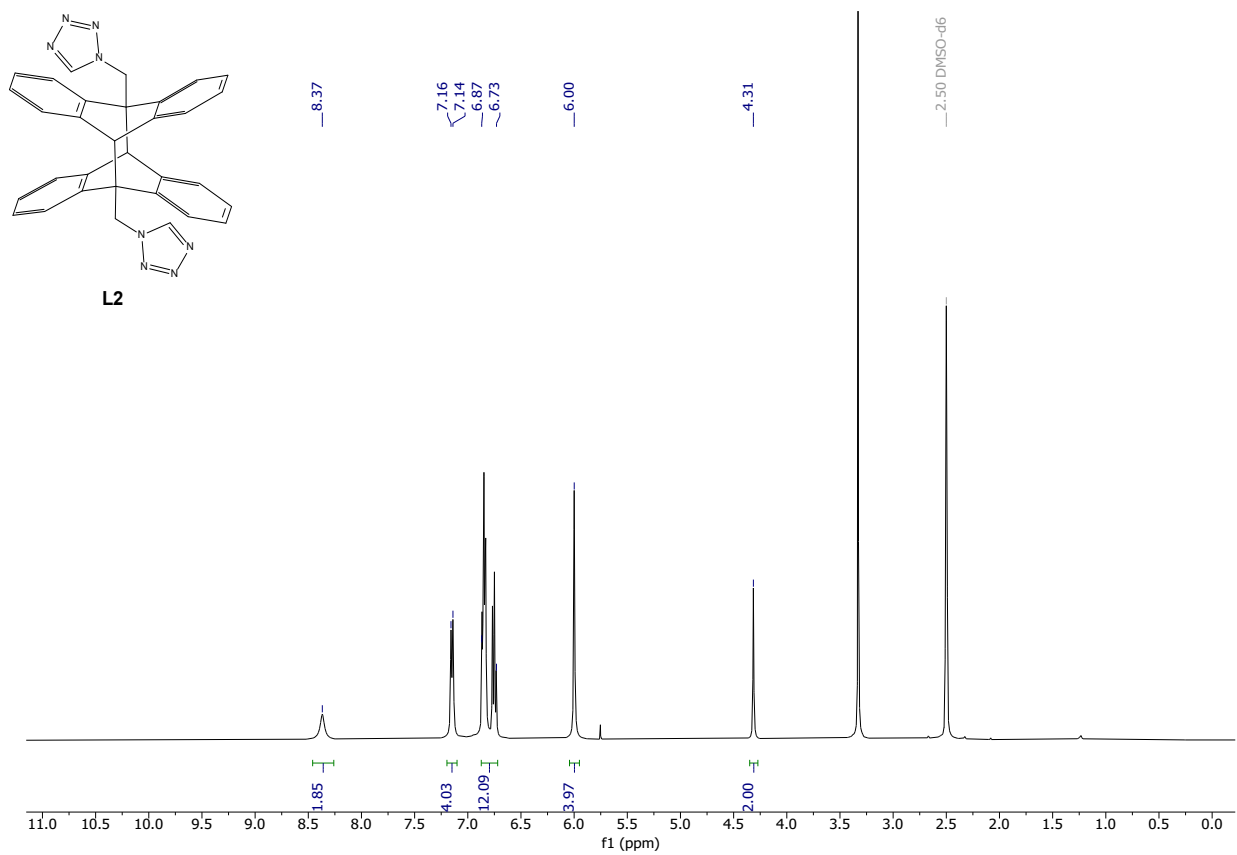

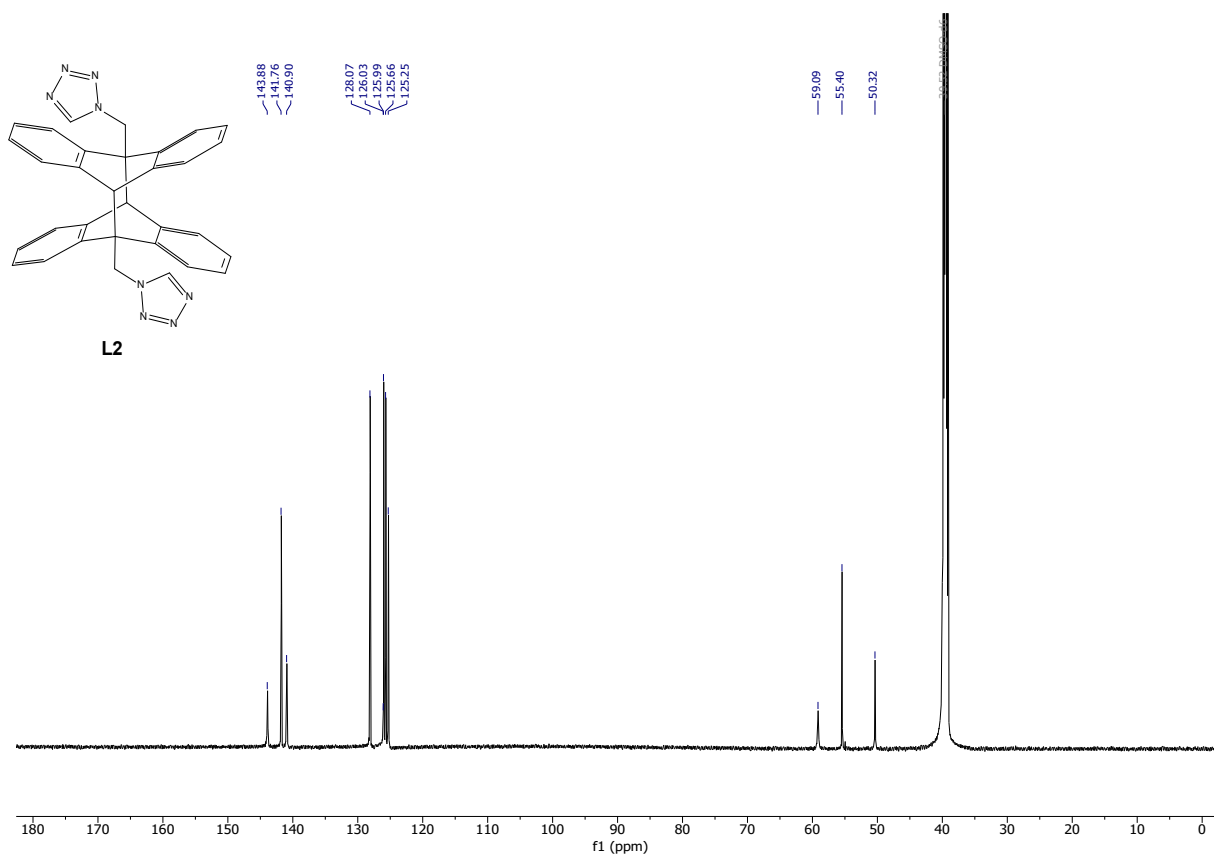

## Photocycloreversion experiments in the solid state

The thermal stability of the dimerized ligand **L2** was followed in the solid state via  $^1\text{H-NMR}$  spectroscopy in DMSO from 50 – 250 °C in 25 °C steps under inert atmosphere. For this, a spatula tip of the ligand was put into a screwcap vial which was lowered into an oil bath at the respective temperature for 10 min. For a better mixing, the vial was softly shaken periodically. The ligand is stable up to 175 °C, where first signals of monomer (10 %) appeared in the spectrum. A color change of the powder from white to yellow was visible at this point. At 200 °C it turned brown, the amount of monomer increased to 94 %, unwanted side products were formed as well. At 225 °C, the amount for monomer increased to 97 %. At 250 °C side products started to take over, the amount of monomer decreased, traces of dimer were also still visible. With this study, it could be shown that the results of the temperature dependent solid-state measurements, VSM and TGA/DSC are not affected by photocycloreversion of the ligand.

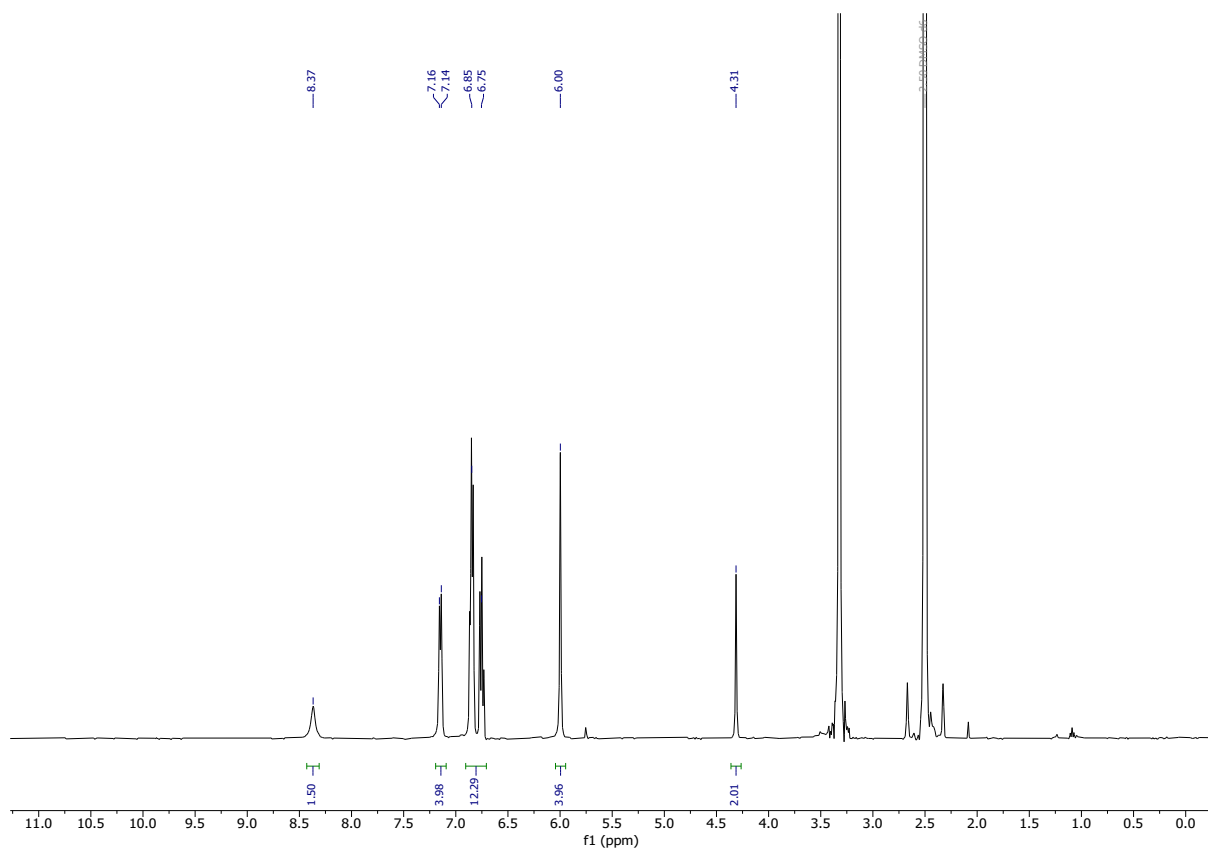

Figure S 52:  $^1\text{H}$ -NMR spectrum in  $\text{DMSO-d}_6$  of the solid sample being heated to  $150\text{ }^\circ\text{C}$  for 10 min.

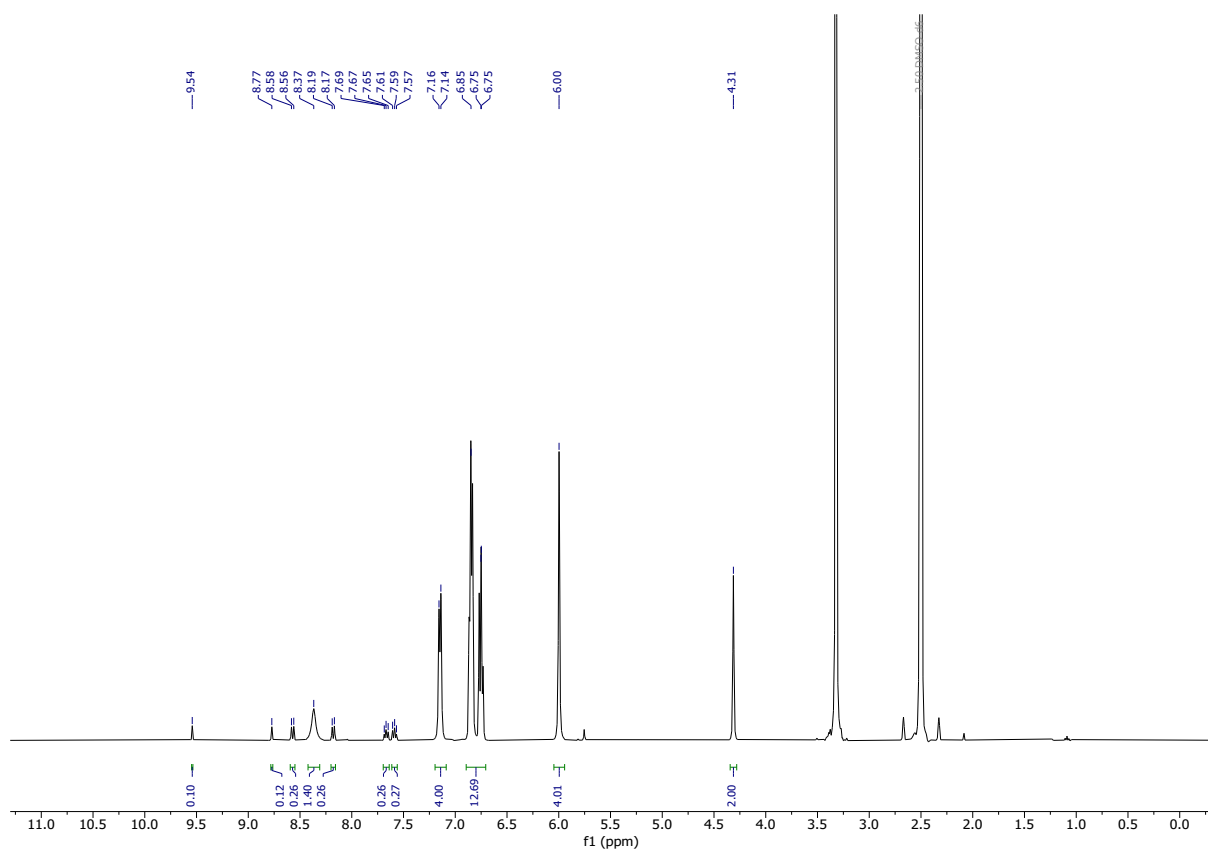

Figure S 53:  $^1\text{H}$ -NMR spectrum in  $\text{DMSO-d}_6$  of the solid sample being heated to  $175\text{ }^\circ\text{C}$  for 10 min.

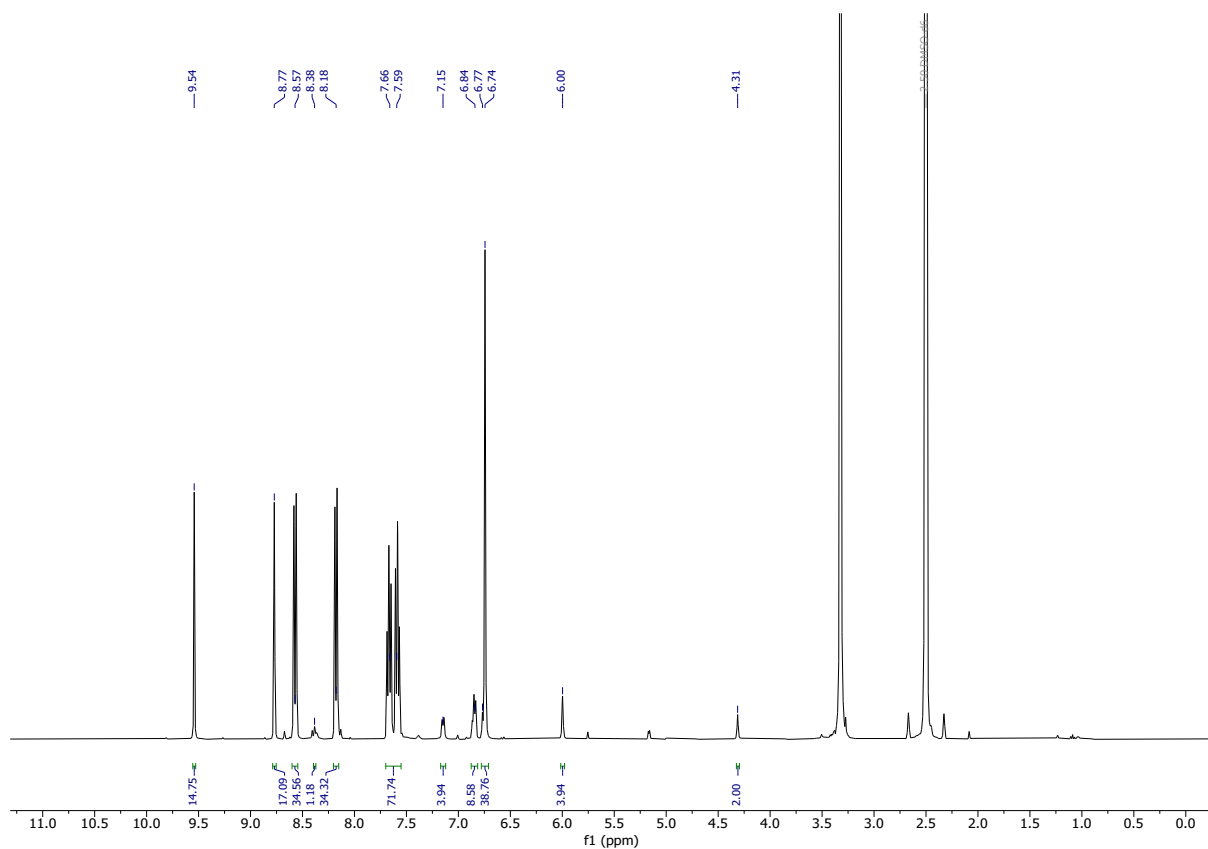

Figure S 54:  $^1\text{H-NMR}$  spectrum in  $\text{DMSO-d}_6$  of the solid sample being heated to  $200\text{ }^\circ\text{C}$  for 10 min.

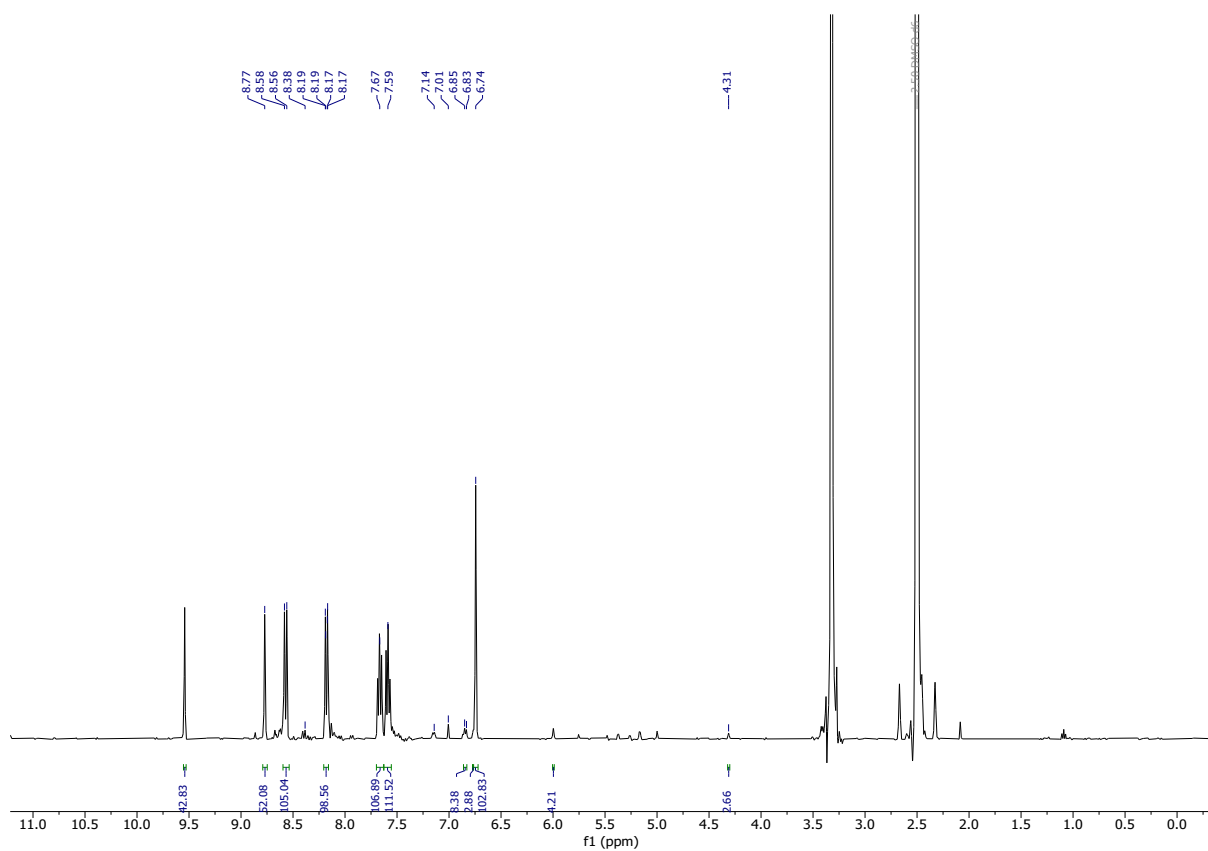

Figure S 55:  $^1\text{H-NMR}$  spectrum in  $\text{DMSO-d}_6$  of the solid sample being heated to  $225\text{ }^\circ\text{C}$  for 10 min.

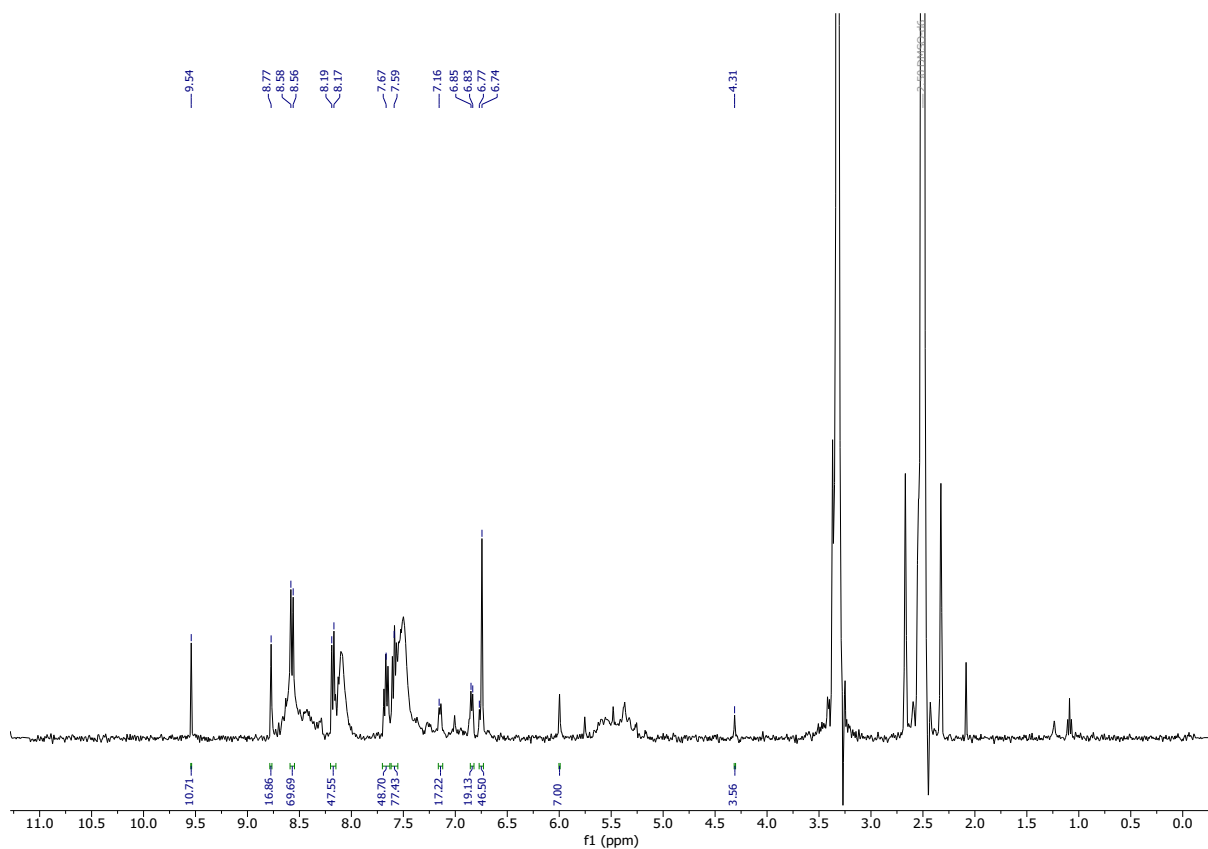

**Figure S 56:**  $^1\text{H}$ -NMR spectrum in  $\text{DMSO-d}_6$  of the solid sample being heated to  $250\text{ }^\circ\text{C}$  for 10 min.

# IR Spectra

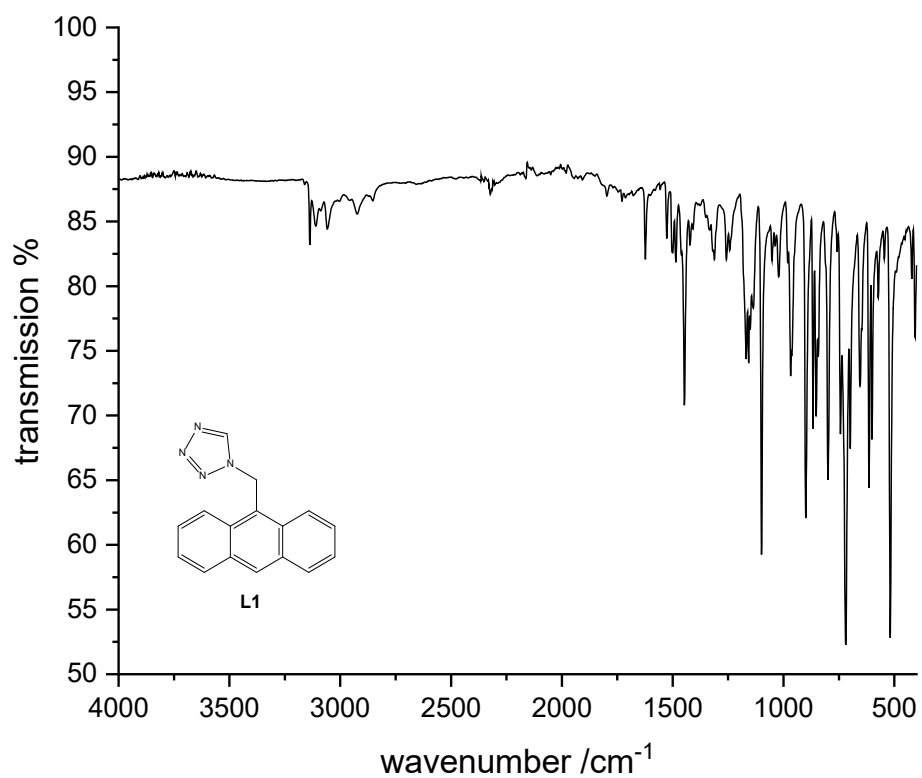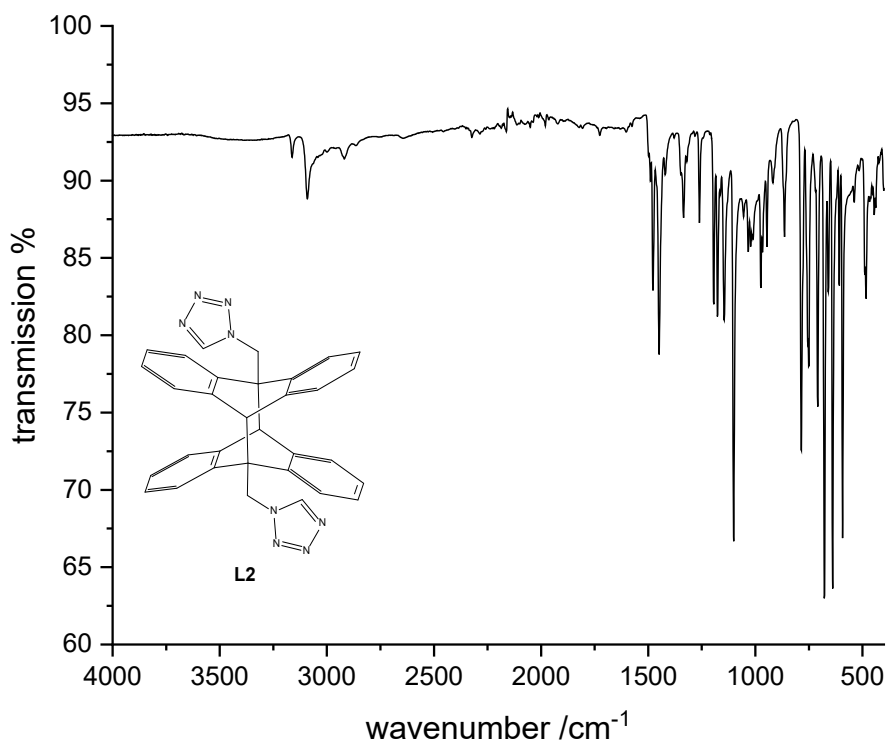

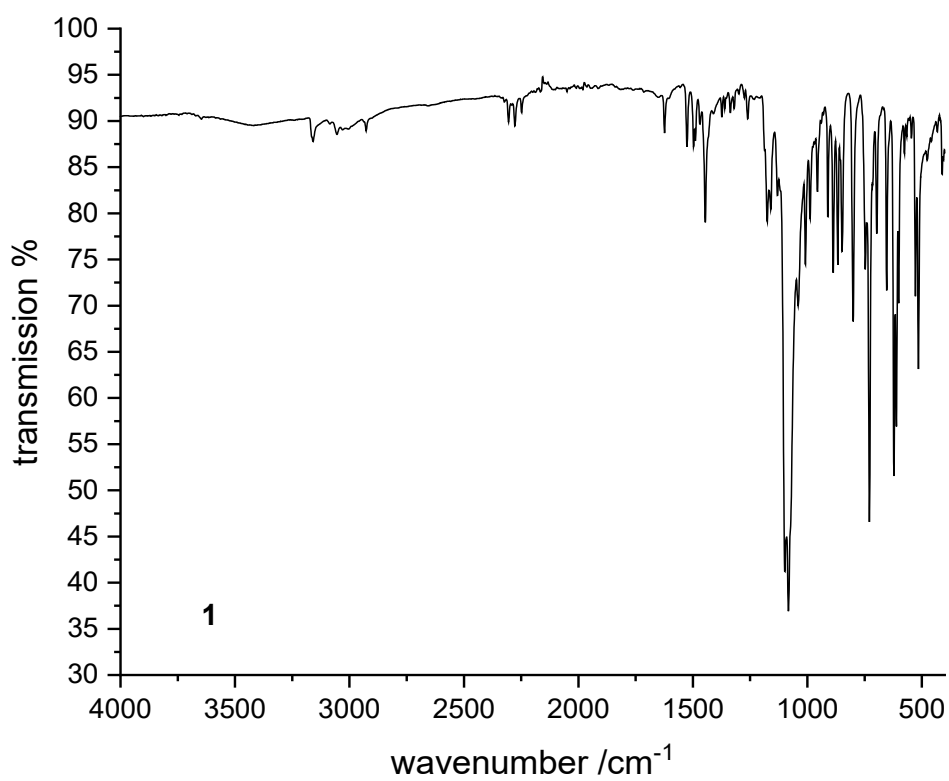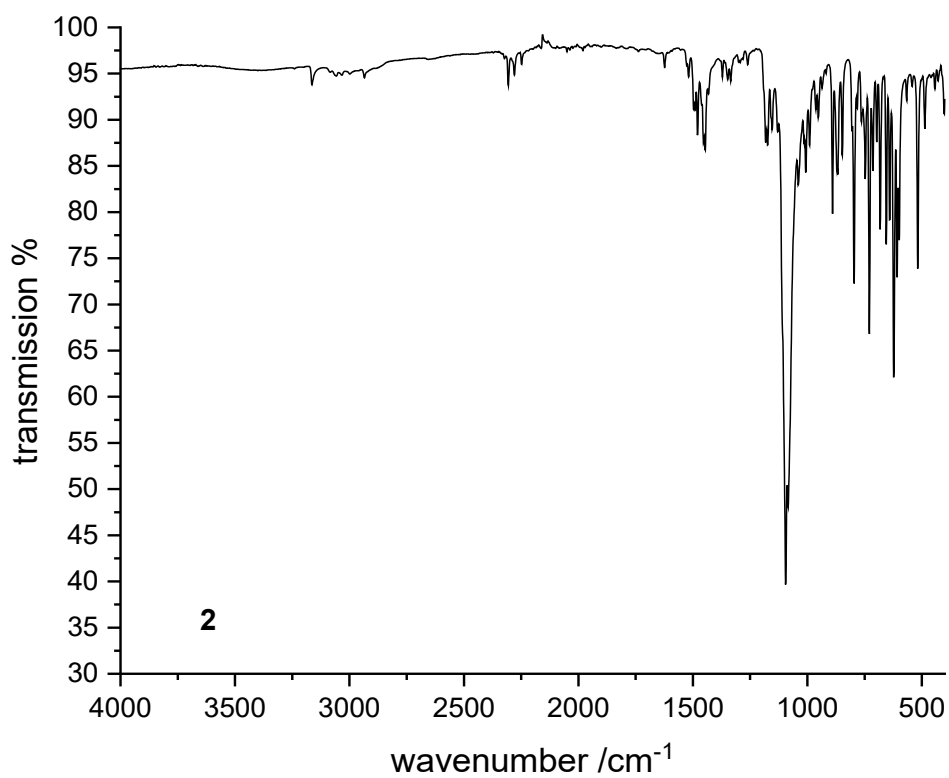

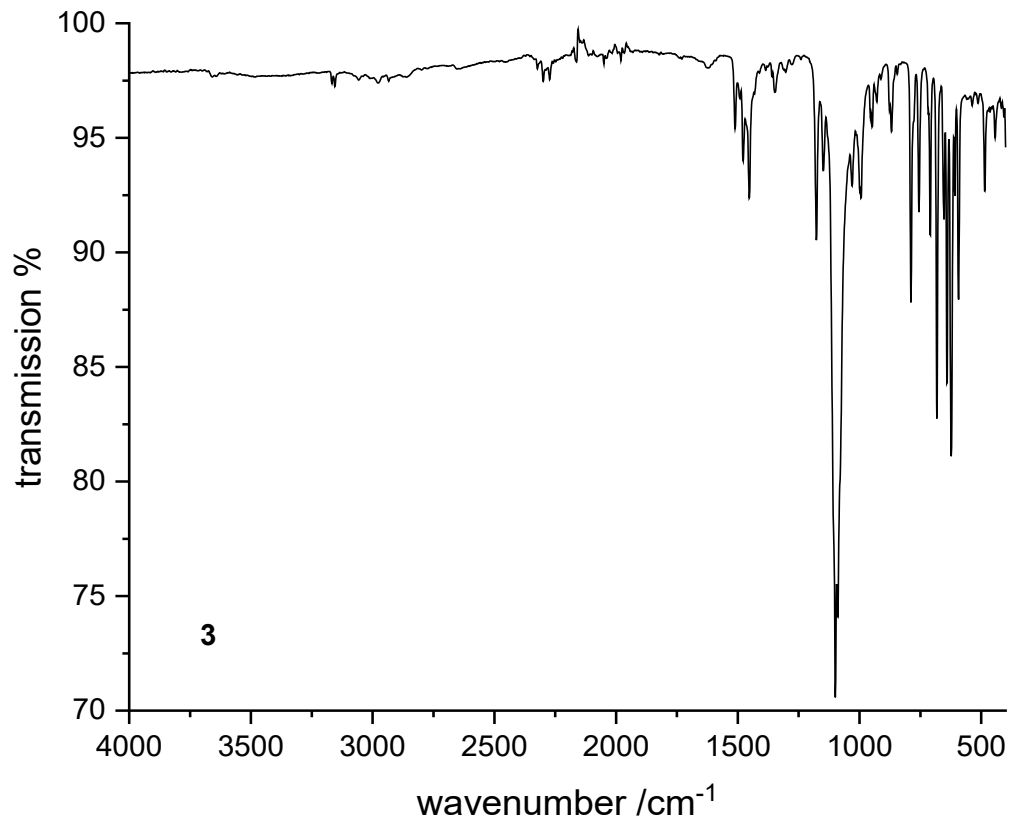

Supplement: d5qi01281c1.pdf [file d5qi01281c1.pdf]
